# Supplementary material for: Spatiotemporal properties of glutamate input support direction selectivity in the dendrites of retinal starburst amacrine cells
Source: eLife. 2022 Nov 8;11:e81533. doi: 10.7554/eLife.81533 (PMC9674338; doi:10.7554/eLife.81533)
Supplement: Figure 1—source data 1. [file elife-81533-fig1-data1.xlsx]

## Sheet: F1BAvg Waveforms
Exemplary ROIs
ROI1	ROI2	ROI3	ROI4	ROI5	ROI6
-0.277228	-0.135638	-0.317732	-0.228593	-0.126669	0.0432421
-0.2762	-0.147627	-0.333314	-0.34221	-0.075659	-0.1717
-0.253921	-0.189297	-0.432298	-0.332358	0.0263561	-0.111922
0.0319456	0.243331	-0.257688	-0.164892	0.381561	0.360629
0.411367	0.641917	0.186984	0.315691	0.809829	1.06493
0.740236	1.2096	0.75361	1.09636	1.37289	1.71965
1.06179	1.64181	1.1843	1.65787	1.8457	2.37506
1.27484	2.09542	1.43889	2.19149	2.1086	2.70346
1.22016	2.02166	1.3485	2.25854	2.08627	2.695
1.15532	1.69996	1.1943	1.99689	1.94896	2.25568
0.78434	1.11451	1.0164	1.76859	1.71498	1.94604
0.677612	0.97114	0.948478	1.48114	1.33879	1.97336
0.590563	0.726897	1.00257	1.47335	1.13311	1.96703
0.614352	0.689342	1.36512	1.59364	1.17781	1.92365
0.475219	0.796825	1.42784	1.5268	1.29491	1.79703
0.766678	0.993993	1.24093	1.42039	1.223	1.54397
0.874581	0.957631	0.862953	1.22123	1.22198	1.32655
1.04474	0.904581	0.596428	1.1103	1.23666	1.07684
0.987419	0.665632	0.353077	1.07361	1.08297	0.758796
0.892621	0.855332	0.119621	1.01311	0.834089	0.815852
0.77271	0.696653	0.115307	0.752602	0.706804	0.871316
0.562033	0.475929	0.455044	0.574958	0.654244	0.658079
0.314268	0.454605	0.487485	0.406279	0.530475	0.636366
0.412425	0.372218	0.600371	0.282667	0.23026	0.553391
0.386986	0.451343	0.450713	0.300053	0.0448402	0.448857
0.302556	0.496876	0.332733	0.35407	-0.0473766	0.280163
0.197614	0.544168	0.159661	0.395148	-0.00959784	0.286896
0.0185363	0.7362	0.103215	0.339577	0.117601	0.318276
-0.0159832	0.490236	0.128022	0.112975	0.216831	0.328729
0.0098773	0.200618	0.0648431	0.0299857	0.245688	0.181136
-0.0315676	0.0431202	-0.06928	0.0185492	0.238752	0.0614959
0.140132	-0.0731111	-0.123897	0.0646883	0.0752364	-0.0435934
0.319155	-0.00155485	-0.149761	0.139582	-0.0067252	-0.193247
0.551918	0.0732667	-0.133429	0.122422	-0.106032	-0.231598
0.620194	0.160104	-0.115043	0.0418366	-0.163871	-0.0828773
0.583182	0.249184	-0.0228342	-0.104897	-0.0906164	-0.206617
0.495468	0.255114	0.0638268	-0.0930565	0.0392572	-0.264661
0.212878	0.48741	0.014214	-0.0205503	0.062067	-0.256777
-0.0168095	0.553134	-0.0267229	0.0439415	0.0653234	-0.346543
0.176718	0.684666	-0.156427	0.069105	0.0241802	-0.233341
0.276623	0.449717	-0.0693977	0.117203	0.0529241	-0.155314
0.579207	0.384658	-0.0615534	0.0367155	-0.0402857	0.12064
0.797974	0.212937	-0.0374491	-0.0069579	-0.115718	0.127756
0.702748	0.122598	0.0808604	-0.0474446	0.0273544	0.173779
0.516153	-0.0652109	0.186619	0.0273266	0.0829741	0.0953087
0.218013	0.165281	0.0776681	0.332431	0.0330414	0.0242203
0.0179387	0.219379	-0.0647516	0.421682	0.144316	0.1713
-0.0856016	0.27912	-0.0709755	0.471295	0.285452	0.302453
-0.0582591	0.111346	0.014625	0.398108	0.26518	0.34593
0.179315	0.166289	0.159468	0.380585	0.12787	0.423102
0.320226	-0.00597107	0.174548	0.257447	0.0102357	0.175569
0.277643	-0.0774666	0.339885	0.101784	-0.199734	0.0758465
0.451007	-0.256998	0.210824	-0.00670679	-0.330763	-0.147867
0.431725	-0.284527	0.0956023	0.0473374	-0.370596	-0.239633
0.426217	-0.436144	-0.163097	-0.0804277	-0.053049	0.137776
0.241071	-0.385763	-0.171845	-0.191412	0.231943	0.224973
0.450562	-0.398165	-0.127642	-0.234929	0.431591	0.209643
0.505692	-0.327929	-0.0743106	-0.0600412	0.490635	0.280784
0.524044	-0.187376	-0.135637	0.0142053	0.456245	0.110127
0.434038	-0.195337	-0.0728087	0.0689733	0.165332	0.00251316
0.457784	0.0388566	-0.143121	0.26011	0.0634322	0.0511825
0.282312	0.210514	-0.0491641	0.194342	-0.128034	0.0884684
0.11779	0.369986	-0.17568	-0.0352767	-0.177137	0.144149
-0.247294	0.551549	-0.0250302	-0.11251	-0.185834	0.180288
-0.150392	0.596559	0.105355	-0.0561567	0.0186926	0.390349
0.00666062	0.654061	0.0944771	0.0521244	0.0651157	0.807801
0.22018	0.669817	0.0838929	0.0879216	0.209989	0.751906
0.64645	0.457189	0.00776681	0.121764	0.324454	0.865641
0.825871	0.404773	0.0859181	0.354602	0.48722	0.776951
0.894791	0.467856	0.10574	0.327879	0.436446	0.472864
0.518336	0.425836	-0.00403702	0.127118	0.27058	0.375604
0.255311	0.433387	0.0629328	0.189379	0.190854	0.318161
0.109104	0.215686	0.0159799	0.223516	0.188785	0.3531
0.111077	0.251644	0.011192	0.256717	0.113778	0.349425
-0.0537507	0.225367	-0.0574514	0.0366216	0.080486	0.275263
0.061623	0.189603	-0.173974	-0.0207637	0.0980567	0.268012
-0.123577	0.0233561	-0.116624	0.0476626	0.0809666	0.159949
-0.0964955	-0.0185545	-0.180269	-0.0606486	0.0875988	0.120789
-0.345155	0.108152	-0.266529	-0.0950777	0.0327631	0.369974
-0.226649	0.0929144	-0.224624	-0.0944539	0.0662626	0.305794
-0.174951	0.122252	-0.0569069	-0.112214	0.04668	0.203474
0.0823041	0.299646	0.155461	-0.0504716	0.0803026	0.0167119
0.0709394	0.420249	0.118329	-0.189306	-0.0279243	0.044302
0.144351	0.316169	0.0635035	-0.204029	0.0102197	-0.0411598
0.184895	0.258313	-0.0631246	-0.174755	0.041155	-0.0967699
0.389287	0.0599385	-0.11983	-0.181634	-0.0232275	-0.16805
0.325386	0.183003	-0.0403969	-0.0696352	0.100373	-0.0591387
0.345912	-0.0039866	0.136116	-0.061559	0.0952219	-0.0710178
0.202812	0.122706	0.253265	-0.050074	0.0966723	-0.0234655
0.222501	0.119055	0.480866	0.0784144	0.0942918	-0.0595314
0.0397525	0.259215	0.445934	0.145855	0.10263	-0.0469306
0.0428425	0.124341	0.421021	0.158221	0.19743	-0.0463098
-0.0827754	0.199281	0.192937	0.262588	0.17815	-0.0740911
-0.0352103	0.136375	0.100607	0.309749	0.105058	-0.10613
-0.212857	0.13272	0.137264	0.353408	0.228891	-0.00389522
0.122986	0.143798	-0.00369235	0.310207	0.0890817	-0.0193111
0.284828	0.138759	-0.10144	0.268568	0.0919569	-0.0632391
0.440725	0.205382	0.06564	0.254497	0.0999552	-0.165078
0.437444	0.298068	0.021582	0.165652	0.13686	-0.355624
0.50077	0.353954	0.0614931	-0.0513132	0.037006	-0.324198
0.301585	0.297	-0.0135413	-0.130043	-0.00757745	-0.400885
0.176213	0.333118	-0.0684775	-0.212321	-0.0502014	-0.243058
-0.0844178	0.244321	-0.156841	-0.111848	-0.113342	-0.00540203
0.0155467	0.200705	-0.403688	-0.0398977	-0.241146	-0.00624998
-0.074136	0.109939	-0.444007	0.0591093	-0.219339	0.0581169
-0.236098	-0.0395639	-0.420528	-0.0114314	-0.141115	0.191963
-0.352346	-0.0530586	-0.432483	0.0119918	-0.0595456	0.165533
-0.330508	0.0640189	-0.280738	-0.0546644	-0.0355029	0.277437
-0.261842	-0.0744489	-0.148512	-0.0646157	0.0731148	0.197911
-0.090742	0.0284622	-0.0865565	-0.0615509	0.104224	0.446963
-0.0698065	-0.0314826	0.0530651	-0.012841	0.0135236	0.307496
0.0849958	-0.0134272	0.0518992	0.0607946	-0.0499373	0.193471
0.0566511	0.104162	0.0657888	0.138733	-0.0438444	0.169002
-0.00538663	0.0641146	-0.00841062	0.0871082	-0.0763955	0.116355
-0.2878	0.210651	-0.154642	0.162685	-0.155599	0.0133155
-0.369576	0.229297	-0.139643	0.121122	-0.0864102	0.0214439
-0.205472	0.0247101	-0.188717	0.110777	-0.013955	-0.0298838
-0.0441336	-0.014725	-0.0855263	-0.0490482	0.119866	0.0888773
0.0714329	-0.142671	0.109912	-0.141469	0.0711284	-0.0765092
0.427486	-0.206627	0.105863	-0.247723	0.202623	-0.0237491
0.547412	-0.274072	0.210101	-0.312722	0.286927	-0.0880369
0.406955	-0.261371	0.0799962	-0.257026	0.204056	-0.125301
0.167968	-0.0622827	0.191964	-0.208631	0.19738	0.0270979
-0.00947043	-0.132064	0.207001	-0.157447	0.173164	0.0713135
-0.0672503	-0.0846149	0.0866486	0.0382462	0.0964773	0.154323
-0.06332	0.168567	0.180812	0.108603	-0.000716832	0.147076
-0.0612614	0.424288	0.140402	0.193808	-0.0840002	-0.0112065
0.0730444	0.55556	0.0944902	0.0620777	-0.0321538	-0.105277
0.178782	0.550627	0.0760973	0.0279748	-0.036644	-0.0624073
0.0826182	0.536834	0.0222349	0.0650104	-0.0995117	-0.0239557
-0.0314589	0.384184	0.24746	0.0548717	-0.0538123	0.267205
-0.143996	0.10214	0.213021	0.0857081	-0.0255841	0.338013
-0.164371	0.00430123	0.107594	0.248628	-0.0808286	0.357344
0.0436462	-0.0614645	0.0663738	0.180793	-0.162986	0.28174
0.0978251	0.0777274	-0.149058	0.0932576	-0.113033	0.114093
0.10171	0.0574167	-0.211112	0.0628948	-0.0516837	0.0462532
0.124286	-0.0179717	-0.236854	0.0173033	0.0928291	-0.0413008
-0.0280849	0.024921	-0.142925	-0.0757787	0.0545484	-0.0361794
-0.251843	-0.16223	0.0672543	-0.101322	0.101286	0.00982606
-0.367785	-0.222418	0.151537	-0.086071	0.202403	0.0164378
-0.417004	-0.141936	0.385799	0.100413	0.161165	-0.12004
-0.360757	-0.236797	0.332479	0.0559148	0.106616	-0.0509564
-0.409564	-0.200199	0.139339	0.0432636	0.0622743	-0.100978
-0.307135	-0.107005	0.069507	0.0807483	0.0129164	0.0327013
-0.321827	-0.148948	0.167905	-0.0350138	0.0610063	-0.138206
-0.281448	-0.00969267	0.127384	-0.0313356	0.0831888	-0.0536134
-0.358793	0.0156581	0.215998	-0.0601392	0.0943412	-0.0308787
-0.25546	0.184458	0.090226	-0.0200399	0.198422	0.0501162
-0.0587243	0.206703	0.34989	0.144056	0.210743	0.111977
-0.0142846	0.227046	0.379148	0.0936777	0.133566	0.136115
0.0157694	0.216835	0.195244	0.033317	0.129486	0.19507
0.128624	0.424226	0.279477	0.0817017	0.0692947	0.268527
-0.0508468	0.341763	0.322237	0.0911155	0.00483519	-0.0142171
-0.0329316	0.277849	0.207984	0.10761	0.0556893	-0.1563
-0.20087	0.219948	0.180723	0.155082	0.00389363	-0.182244
0.0374306	0.215117	-0.0591467	0.138803	0.0534423	-0.23342
0.0735708	0.0802286	0.0560147	-0.0697057	-0.0722757	-0.23558
0.0945537	0.239561	-0.0944064	-0.159441	-0.0682222	-0.256318
0.188795	0.0750718	-0.12986	-0.120503	-0.00358462	-0.111802
0.132198	0.206092	-0.000631087	0.00517519	0.059878	0.0223838
0.063442	0.201007	-0.0843084	-0.0338257	0.0254451	-0.0807237
0.229358	0.115019	-0.0545213	0.0518171	-0.0298266	-0.197033
0.126697	0.0767505	-0.0737198	0.20206	-0.116539	-0.0808227
0.131795	-0.0987687	-0.211524	0.0586551	-0.243941	-0.117762
-0.0663126	-0.0940635	-0.127144	-0.0453904	-0.372063	-0.161149
-0.137402	-0.165618	-0.145944	-0.054174	-0.354839	-0.0858684
-0.145778	-0.230201	0.121094	0.00699686	-0.281547	0.000346322
-0.268819	-0.12539	0.0109863	0.0442344	-0.230578	0.173778
-0.411427	-0.18454	-0.0974891	-0.057449	-0.14924	0.115767
-0.170205	-0.147738	-0.182169	0.0213665	-0.0763541	-0.0310897
-0.137051	-0.176328	-0.222945	0.0220019	0.00328162	-0.0665316
0.112963	-0.2983	-0.313457	-0.107035	-0.0977109	-0.0696675
0.177576	-0.0556836	-0.288112	0.0284943	-0.0834554	-0.0313587
0.322267	-0.0561902	-0.257064	-0.106917	-0.172409	0.0225488
0.2499	0.10955	-0.361794	-0.119428	-0.155108	0.0861402
0.0313012	0.0484058	-0.392645	-0.208846	-0.171434	0.120308
-0.102167	0.0566316	-0.327765	-0.271543	0.0371501	0.147176
0.0469005	0.131043	-0.304332	-0.157329	0.158246	0.0330771
0.0542917	-0.0877496	-0.0660508	-0.092245	0.25068	-0.0112577
0.0858103	-0.114965	0.077837	-0.0723383	0.178439	0.0441669
-0.0463401	0.0761932	0.123096	0.04424	0.0591234	0.0522557
-0.243321	0.0386933	0.102985	-0.00512518	-0.0778936	-0.00963168
-0.385417	0.0513392	-0.106269	-0.0319348	-0.145238	-0.0015187
-0.30469	-0.0385738	-0.0517187	-0.0708031	-0.205437	-0.00948586
-0.0769334	0.0425955	-0.0454173	-0.0193305	-0.129518	0.0287647
0.174333	-0.110147	-0.0476219	0.0713089	-0.0642559	-0.0241477
0.301686	-0.151438	-0.0278119	0.08932	0.100791	0.0332269
0.432131	-0.115297	0.0441138	0.00124742	0.206665	-0.025804
0.499512	-0.0146724	-0.129744	-0.0892312	0.149247	-0.0461297
0.409435	0.00866996	-0.070997	-0.13447	0.128909	-0.212788
0.483071	0.158002	-0.0728263	-0.133139	0.0188925	-0.0718668
0.303885	0.163646	0.0976404	-0.230509	-0.0863815	0.0483422
0.236224	0.143645	0.253643	-0.18286	-0.0872636	0.18858
-0.0265215	-0.0828856	0.22177	-0.134523	-0.0180362	0.301854
-0.155155	-0.140799	0.193014	-0.0325008	0.0489959	0.295757
-0.212145	-0.393355	0.148427	-0.0581824	0.14236	0.164448
-0.0312254	-0.331706	-0.0272509	-0.0760461	0.15602	0.14471
0.190805	-0.20222	-0.0467139	-0.0957314	0.0568943	-0.122808
0.232063	-0.0907818	-0.127777	-0.227693	0.0304072	-0.135404
0.170029	-0.0981958	-0.0517813	-0.378239	-0.0143302	-0.00213096
0.160094	-0.045986	-0.145973	-0.269955	-0.0591514	0.144405
0.0417756	-0.0581879	-0.244249	-0.207892	-0.117351	0.164865
-0.0669495	-0.165754	-0.143578	-0.102464	-0.166754	0.0639636
-0.192259	-0.293068	-0.0835563	0.0301745	-0.10646	0.0369203
0.109423	-0.106374	0.0175087	0.00793993	-0.0429518	0.129962
0.236268	0.0786155	0.102514	0.0500135	-0.0993678	0.0274351
0.264788	0.131106	0.0526059	-0.106924	-0.0454706	-0.107017
0.195469	0.141424	0.0885045	-0.0824396	-0.037447	-0.000400834
-0.108382	0.15371	-0.0120518	-0.0813316	0.102892	-0.0136739
-0.196173	0.264635	-0.0795394	-0.126667	0.137994	-0.0801013
-0.320897	0.189893	-0.190845	-0.112309	0.248532	-0.0518462
-0.270573	0.135647	-0.0208041	-0.0536151	0.239264	-0.156627
0.00245932	0.148566	0.0233552	-0.134834	0.23874	-0.104894
0.151965	0.0605346	0.0914511	-0.132603	-0.0241219	-0.0362416
0.331663	0.0108247	0.121971	-0.235921	-0.214513	-0.147614
0.174728	-0.151455	0.107956	-0.171218	-0.301989	-0.0278513
-0.0186666	-0.301569	0.18011	-0.191894	-0.157714	0.0195495
-0.141627	-0.274418	0.0808976	-0.179681	-0.0415958	0.244478
-0.269841	-0.306081	-0.0608577	-0.14636	0.0524771	0.46286
-0.390621	-0.305743	0.059808	-0.0302766	0.0826898	0.397349
-0.268946	-0.121993	-0.105455	0.00309235	0.0449749	0.479014
-0.326609	-0.105304	-0.331952	-0.0359357	-0.17861	0.373849
-0.0286485	-0.00681862	-0.468383	0.0813837	-0.311173	0.22145
0.0752101	0.0187616	-0.589425	0.149644	-0.318824	0.0989539
0.0535895	0.0463575	-0.29484	0.211526	-0.172506	-0.0223239
-0.0539362	0.0685909	-0.20822	0.116371	-0.0409916	-0.0360242
-0.220617	0.102817	-0.0779244	0.128413	-0.00042136	-0.0638811
-0.373611	-0.0443711	0.00459388	0.165233	0.134251	-0.160893
-0.34445	0.0387146	-0.0630362	0.103405	0.104382	-0.0432801
-0.301784	-0.0845955	-0.172163	0.0267183	0.0523297	0.0233064
0.106071	-0.137652	-0.279268	0.121535	0.0595401	0.098899
0.0388401	-0.153467	-0.203087	0.111304	-0.0843048	0.136358
0.141817	-0.288381	-0.0583078	0.0668119	-0.0553359	0.204648
0.211528	-0.349621	0.0240888	-0.0482464	0.00781777	0.0769183
0.282247	-0.172797	0.116955	-0.123799	-0.0405237	-0.0436278
0.17369	-0.197315	0.0778645	-0.197674	-0.0401889	-0.117007
0.0831581	-0.14137	-0.106135	-0.310077	-0.225185	-0.173422
0.35582	0.00536443	0.0603145	-0.240006	-0.208947	-0.177636
0.629884	0.362978	0.0798812	0.167588	0.135787	0.00866112
0.773395	0.683517	0.454207	0.502411	0.599674	0.477966
1.29896	1.11771	0.650824	1.01363	1.15693	1.03742
1.70931	1.31396	1.09315	1.28262	1.65424	1.40944
1.82747	1.32145	1.26668	1.36478	1.70536	1.58566
1.56541	1.12769	1.23551	1.41079	1.64238	1.47392
1.15885	0.902124	1.06556	1.13357	1.21547	1.12338
0.924767	0.658173	0.897595	0.901833	0.875099	0.83807
0.854471	0.379087	0.525642	0.73654	0.65225	0.702527
0.662902	0.281665	0.420044	0.465875	0.519694	0.679672
0.805687	0.568244	0.182803	0.468821	0.438109	0.731399
0.915134	0.577649	0.169998	0.320538	0.440793	0.72191
1.00012	0.585511	0.146959	0.36695	0.465733	0.679793
0.898892	0.646797	0.247436	0.443876	0.614561	0.485865
0.843143	0.842821	0.438825	0.319828	0.575731	0.289111
0.960919	0.967958	0.468981	0.246922	0.40015	0.17506
1.06901	0.859995	0.464007	0.108354	0.0993218	0.147731
0.940764	0.919857	0.521406	0.0951256	-0.0637931	0.422505
1.09994	1.07328	0.389744	0.0337931	0.0377621	0.556475
1.06288	1.10595	0.287164	0.257695	0.152653	0.670653
0.937425	1.00081	0.164375	0.438076	0.29892	0.88284
0.731348	0.732816	0.12802	0.518247	0.430433	0.720657
0.97039	0.832152	0.094515	0.435822	0.536449	0.494391
0.896242	1.00721	0.0470526	0.502942	0.471003	0.297168
0.937241	0.870143	0.122998	0.465431	0.389382	0.211455
0.996029	0.719384	0.340846	0.491708	0.407476	0.373013
1.37907	0.501076	0.303881	0.3927	0.385911	0.175538
1.45266	0.201133	0.342383	0.39661	0.252709	0.0647346
1.29706	0.0204047	0.273914	0.306026	0.140943	0.198221
1.23315	-0.18325	0.264312	0.201443	0.180069	0.104071
1.19819	0.0148337	0.267973	0.0962652	0.24949	0.249795
0.587233	0.122709	0.166814	0.0664367	0.282353	0.0925478
0.443761	0.346717	0.104753	-0.0505936	0.363259	0.274715
0.471129	0.539388	0.129631	0.0335175	0.397976	0.240871
0.896465	0.622666	0.0105279	0.0489263	0.304747	0.264011
0.953394	0.663048	0.102534	0.0751004	0.272658	0.234661
1.0566	0.701233	0.0501384	0.225645	0.268336	0.4829
0.901325	0.61412	-0.043607	0.25348	0.29296	0.513957
0.774901	0.684878	0.0937735	0.3409	0.216596	0.611781
0.429116	0.588295	0.0541634	0.386164	0.217801	0.413288
0.380104	0.533633	-0.0817184	0.479821	0.348355	0.551115
0.525502	0.474484	0.0390171	0.583344	0.405373	0.426095
0.713661	0.449135	0.139427	0.541839	0.408633	0.588724
0.648597	0.506197	0.363908	0.577358	0.438587	0.482035
0.52624	0.329253	0.297367	0.503441	0.29263	0.652832
0.445999	0.496903	0.278869	0.384092	0.273898	0.451007
0.66891	0.810727	0.416114	0.451257	0.116432	0.572263
0.589514	0.781497	0.331344	0.505838	0.0984465	0.460179
0.922874	0.541223	0.179661	0.608588	0.0950607	0.260812
1.19433	0.270783	0.0762328	0.469855	0.208468	0.31302
1.41493	0.191603	0.0635434	0.274825	0.288206	0.328438
1.34339	0.114835	0.158439	0.170751	0.377273	0.32742
1.19624	0.0717032	0.132118	0.0872688	0.355182	0.405719
1.05347	0.403979	0.262742	0.123005	0.218476	0.356364
1.0099	0.569413	0.40435	0.185609	0.184219	0.499076
0.767822	0.437548	0.354841	0.289991	0.332522	0.391104
0.962235	0.417014	0.340002	0.391599	0.254541	0.28733
1.0549	0.293484	0.242912	0.248208	0.333979	0.313189
1.29608	0.362243	0.155722	-0.0458146	0.303734	0.245021
1.21663	0.334413	0.204081	-0.0809171	0.348067	0.253811
1.10312	0.438521	0.132531	-0.00136469	0.242385	0.144592
0.819732	0.621195	0.189408	0.0666792	0.107356	0.13104
0.689176	0.554742	0.254119	0.069962	0.197756	0.185733
0.470068	0.378017	0.283934	0.0793825	0.394272	0.291324
0.577808	0.477161	0.322746	0.151895	0.384806	0.451455
0.633751	0.477374	0.199978	0.119094	0.364635	0.382452
0.883916	0.236854	-0.00844157	-0.0766852	0.39659	0.384734
0.900625	0.319221	0.107144	-0.0190228	0.479498	0.344656
1.18409	0.474975	-0.00830054	0.139961	0.389116	0.216521
1.18636	0.683253	0.0136862	0.175717	0.336079	0.114319
1.0991	0.819912	0.0983667	0.158719	0.265638	0.0686579
0.815536	0.690307	0.201596	0.0642356	0.271409	0.201026
0.667847	0.672246	0.298709	0.294029	0.301161	0.170617
0.60939	0.264509	0.363516	0.448676	0.269613	-0.0310353
0.504597	-0.123353	0.551248	0.389817	0.389609	-0.0635947
0.386016	-0.151562	0.635454	0.338287	0.366191	-0.0470584
0.666941	-0.000716768	0.464752	0.316291	0.147127	-0.086823
0.48744	0.201889	0.292157	0.041584	-0.021286	0.0729885
0.428703	0.384287	0.17372	0.0187937	-0.0822718	0.128126
0.888364	0.470037	0.113452	-0.0720285	-0.13786	0.136203
1.08879	0.442977	0.10734	0.0902341	-0.0161847	0.125051
1.43447	0.293364	0.123718	0.212698	0.00576421	-0.0092309
1.35968	0.341533	0.22984	0.32436	0.155615	0.0829172
1.27759	0.249303	0.416858	0.427658	0.20953	0.143379
1.18302	0.448301	0.578137	0.40637	0.222923	0.148019
0.727801	0.475728	0.532544	0.269746	0.319217	0.358842
0.585822	0.554596	0.481073	0.275494	0.448238	0.277179
0.998899	0.577083	0.370569	0.202416	0.429749	0.116874
0.800787	0.377786	0.224471	0.168349	0.335761	0.0756697
0.809657	0.266975	-0.0614778	0.333366	0.170032	0.0506359
0.930814	0.0873456	-0.178692	0.360446	0.12976	0.203383
0.968675	0.186576	-0.0812437	0.398899	0.0420675	0.312186
0.900786	0.364807	-0.00746122	0.26622	0.0362329	0.338375
0.626662	0.423379	-0.0767343	0.0951425	-0.0093529	0.32857
0.248543	0.438228	0.195829	-0.0913396	-0.0548002	0.130106
0.404077	0.442189	0.409618	0.0419729	-0.0761558	-0.0277666
0.482282	0.422495	0.598199	0.0652874	-0.0763065	-0.248825
0.768103	0.419723	0.490187	0.243688	0.0020441	-0.122355
1.2698	0.344156	0.413844	0.209411	0.141546	0.0292461
1.31846	0.568966	0.0586366	0.232541	0.209407	0.0846813
1.74139	0.668812	-0.147341	0.155502	0.308487	0.0727707
1.61519	0.410124	-0.400776	0.0339922	0.212034	0.0483172
1.42645	0.399805	-0.240589	0.0243643	0.28401	-0.0111467
1.54004	0.506914	0.00814524	0.293758	0.178615	-0.185397
1.50767	0.510399	0.0786453	0.391112	0.138393	-0.154208
1.39214	0.532757	0.153047	0.397291	0.0642496	-0.0224571
1.15609	0.619681	0.119206	0.372634	0.146385	0.193117
0.85817	0.609547	0.0718632	0.272135	0.0808541	0.14764
1.08441	0.570141	0.0531969	0.0690387	0.0660326	0.114234
0.86371	0.155969	0.0263936	-0.0576767	0.160703	0.181825
1.0014	0.498423	0.0467445	-0.179018	0.336991	0.19465
0.819883	0.527675	0.00244848	0.00642768	0.269877	0.0796436
0.681363	0.600076	-0.064619	0.0348813	0.427633	0.0868816
0.482239	0.634502	0.0598339	0.111986	0.398498	0.189357
0.154208	0.684404	0.0807566	0.168037	0.392791	0.329956
-0.156529	0.509908	0.315053	0.148516	0.17461	0.284575
-0.0973099	0.327754	0.479041	0.129009	0.075832	0.329242
-0.159166	0.0375167	0.483619	0.0563823	-0.048668	0.316102
0.0455348	-0.0665107	0.318254	0.0786508	-0.135232	0.228568
-0.199445	-0.189983	-0.0580294	0.20748	-0.109111	0.0206266
0.00799026	-0.150368	-0.236474	0.153551	0.0336873	0.0747417
0.212819	-0.192231	-0.318511	0.196742	0.0564431	0.263719
0.175126	-0.0402144	-0.21096	0.138044	0.139744	0.339703
0.0416788	0.0861554	0.0147722	0.0846058	0.101008	0.150432
0.161685	0.154857	0.20212	-0.0278446	0.126734	0.122191
0.178818	0.275549	0.162222	-0.239711	0.111847	0.00619674
0.274006	0.0951331	0.0621083	-0.179938	0.197721	-0.10202
-0.0869962	0.105867	0.00747116	-0.28229	0.256127	-0.249778
0.0464127	-0.163623	-0.0771856	-0.188731	0.12427	-0.0414699
0.217883	-0.252986	-0.140914	-0.135717	0.0923918	0.0122215
0.0523623	-0.0986155	-0.0938064	-0.128097	-0.064388	0.0657252
0.100617	0.0405733	-0.0690582	-0.205398	-0.203834	-0.150397
-0.0111081	-0.0265496	-0.162784	-0.217341	-0.256993	-0.102255
0.154083	0.130264	-0.25657	-0.245243	-0.239242	-0.192455
0.215857	0.151635	-0.330058	-0.149198	-0.182223	-0.248626
0.150018	0.222533	-0.261297	-0.0911385	-0.0868106	-0.306284
0.276462	0.111173	-0.309484	0.0400188	-0.107182	-0.274743
0.16013	0.117087	-0.241344	0.0941875	-0.0759749	-0.28053
0.105455	0.106014	-0.163809	-0.0513454	-0.0700376	-0.159778
-0.0506669	-0.0591523	-0.10762	-0.0808243	0.0670971	-0.123005
-0.297613	-0.322863	-0.0966559	-0.0641691	0.0879493	-0.0596033
-0.110524	-0.363672	0.0277024	-0.104906	0.0836483	-0.0832971
-0.0224444	-0.401967	-0.0531354	-0.109416	0.0757612	-0.155552
0.151226	-0.291361	0.034583	-0.165175	0.0791886	-0.159533
0.200061	-0.3201	0.0511625	-0.187666	0.0482168	-0.194887
0.061487	-0.0886772	0.106527	-0.142046	-0.00934355	-0.144762
0.145091	0.0902608	0.158337	-0.135812	0.0250845	0.00816924
-0.223758	0.0171009	0.0520485	-0.0257112	-0.0079236	0.0129952
-0.258502	0.0774166	-0.0356151	-0.0535472	-0.125645	0.0313823
0.0186749	-0.0246433	-0.130583	0.0336252	-0.234655	0.0655166
0.121338	-0.0641609	-0.221085	0.0364011	-0.305184	0.211711
0.1521	-0.13696	-0.152168	-0.040305	-0.325617	0.260915
0.141128	-0.0887028	-0.0420615	-0.0440158	-0.386935	0.206672
0.0523143	0.198953	-0.0110161	-0.12513	-0.288495	0.221065
0.175532	0.203257	-0.0005164	-0.166076	-0.100981	0.0812758
0.181449	0.0263513	-0.17743	-0.270405	0.0299615	0.0661855
0.0906827	-0.0887604	-0.174343	-0.316147	0.0475626	0.153401
0.34679	-0.17041	-0.26349	-0.285406	0.0475083	0.134659
0.280864	-0.105302	-0.336971	-0.195913	0.118021	0.239928
0.413408	-0.196381	-0.510262	-0.0224953	0.140847	0.101264
0.36651	-0.0571234	-0.466261	0.0885096	0.0866746	0.0663276
0.212801	0.00299653	-0.336232	0.143149	0.0951173	-0.0259863
0.30646	0.0700219	-0.259033	0.188694	0.124991	-0.234541
0.309155	-0.0202883	-0.0996203	0.121547	0.104447	-0.276447
-0.00457425	-0.0672988	0.00928234	0.031428	-0.0343722	-0.180512
0.0411795	0.0924073	-0.0724016	-0.171798	-0.0129313	-0.189935
0.131067	0.34461	-0.227338	-0.196674	-0.0354552	-0.0497111
0.248731	0.340344	-0.256783	-0.225834	-0.119917	0.0432115
0.0872312	0.176815	-0.148299	-0.10335	-0.111572	0.149956
0.111422	0.322301	0.0983092	-0.0910375	-0.0727571	0.190687
0.0770643	0.38591	0.0896773	-0.061232	-0.0120075	-0.0519058
0.092086	0.146115	0.197765	-0.0847618	0.0112675	-0.179753
-0.154479	-0.137583	-0.0640828	-0.12568	0.0154889	-0.130091
-0.167617	-0.12881	-0.210247	-0.177675	0.110605	-0.0892897
-0.192802	-0.107459	-0.367276	-0.124433	-0.0129614	0.00602276
-0.343254	-0.276483	-0.326103	-0.194848	-0.0570566	0.0155919
-0.248742	-0.357902	-0.290909	-0.125536	0.0160371	0.119425
0.155254	-0.0425729	-0.184427	-0.217553	0.00248174	0.173337
0.334617	0.0123288	-0.163804	-0.185889	-0.0219795	0.0304682
0.737087	0.071214	-0.178777	-0.204133	-0.103489	0.0851359
0.840064	-0.0638432	-0.203478	-0.186406	-0.00324874	0.0434623
0.658087	0.0380221	-0.13923	-0.1056	-0.0222818	0.109917
0.344167	-0.0563334	-0.279349	-0.0759343	-0.125708	0.0446125
0.107826	-0.138021	-0.259289	-0.176418	-0.0652916	0.000637826
-0.0368995	-0.131042	-0.126073	-0.229542	-0.103029	-0.0371299
-0.0116568	-0.115177	-0.0126069	-0.203364	-0.178425	-0.137931
-0.0509993	-0.203879	-0.0248234	-0.188332	-0.276278	-0.108965
0.0990058	-0.0344534	-0.0493698	-0.186403	-0.250716	-0.0462804
0.154173	-0.122917	-0.0520644	-0.205128	-0.094036	0.011189
0.269271	-0.0361127	-0.141362	-0.229766	-0.0963138	0.0893725
0.421194	-0.0358488	-0.208668	-0.133396	-0.0219925	0.213502
0.507636	0.120974	-0.125966	-0.143106	-0.0250101	0.217379
0.498443	0.122436	-0.0860245	-0.102052	-0.0814177	0.0384123
0.414141	0.111089	-0.0963797	-0.0988554	-0.115573	-0.127154
0.293697	-0.0246169	-0.166368	-0.137941	-0.133328	-0.228941
0.160799	0.0557429	-0.224641	-0.233421	-0.141339	-0.449497
-0.122833	-0.0508489	-0.398327	-0.366553	-0.11651	-0.434953
0.10939	0.000760503	-0.383549	-0.451407	-0.123197	-0.573529
0.105468	-0.105013	-0.283635	-0.282707	-0.0183358	-0.364383
0.117878	0.155548	-0.168117	-0.210913	-0.087459	-0.27466
0.0733942	0.280253	-0.185514	-0.187553	-0.045503	-0.159333
0.0297891	0.345412	0.0521554	0.0263554	-0.1467	-0.120818
0.0452664	0.154035	0.177039	0.08098	-0.140467	-0.0375196
0.141381	0.105882	0.0755968	0.0732779	-0.310059	-0.14474
0.0129153	-0.134954	-0.0176774	0.0803609	-0.190843	-0.100378
0.111784	-0.107651	-0.0306596	-0.0198342	-0.146796	-0.173278
0.152406	-0.180363	-0.129178	-0.126103	-0.0517075	-0.0407024
0.0710837	-0.0420745	-0.197443	-0.29502	-0.0114452	0.00378725
-0.014111	-0.0159095	-0.293594	-0.390763	0.0550793	0.0111073
-0.166332	-0.0956978	-0.223432	-0.284083	-0.00199479	-0.089552
-0.169212	-0.370804	-0.261679	-0.379738	-0.0202399	-0.0341061
-0.113999	-0.338537	-0.301255	-0.410014	-0.196102	-0.0844057

## Sheet: F1CD STATS
Sustained-transient index (STi)			Plateau phase
Proximal ROIs	Distal ROIs		Proximal ROIs	Distal ROIs
0.241552	0.243772		0.530605	0.595768
0.343188	0.248571		0.878013	0.384627
0.352561	0.146363		1.00375	0.274517
0.407868	0.147399		1.20508	0.222002
0.400245	0.306207		0.938251	0.646014
0.384789	0.132617		1.09957	0.186267
0.369133	0.169227		1.30676	0.169227
0.327463	0.177839		0.920635	0.177839
0.370881	0.14773		0.370881	0.268334
0.41	0.232285		0.764665	0.359247
0.293092	0.171902		0.831637	0.241474
0.283937	0.111966		0.661027	0.169385
0.425649	0.143583		1.17578	0.143583
0.421921	0.236393		0.937271	0.418154
0.305385	0.123482		1.08312	0.312818
0.312366	0.227485		0.312366	0.481743
0.288905	0.207529		0.593814	0.723964
0.246328	0.120211		0.498016	0.205612
0.243816	0.112697		0.453439	0.148106
0.234709	0.125536		0.451356	0.125536
0.369828	0.130995		0.799996	0.130995
	0.127203			0.216145
	0.171629			0.228509
	0.106486			0.319676
	0.0888337			0.144744
	0.145892			0.145892
	0.137772			0.157372
	0.299999			0.759041
	0.189373			0.538601
	0.164383			0.223542
	0.14589			0.170583
	0.219369			0.219369
	0.127959			0.271359
	0.172709			0.172709
	0.187143			0.187143
	0.143907			0.295951
	0.143542			0.143542
	0.234848			0.234848
	0.115377			0.31934
	0.119449			0.238899
	0.0912164			0.200019
	0.165343			0.466411
	0.113696			0.272558
	0.124094			0.459475
	0.0928494			0.179242
