# Supplementary material for: Spatiotemporal properties of glutamate input support direction selectivity in the dendrites of retinal starburst amacrine cells
Source: eLife. 2022 Nov 8;11:e81533. doi: 10.7554/eLife.81533 (PMC9674338; doi:10.7554/eLife.81533)
Supplement: Figure 2—source data 1. [file elife-81533-fig2-data1.xlsx]

## Sheet: STis
Sustained-transient index (STi)
Proximal ROIs	Distal ROIs
0.263562	0.158753
0.327764	0.112886
0.280888	0.132559
0.235016	0.14292
0.317164	0.199441
0.342673	0.178144
0.43796	0.170007
0.321685	0.158576
0.299046	0.144937
0.359853	0.241905
0.371104	0.175886
0.312689	0.202072
0.399946	0.175104
0.30182	0.190679
0.228532	0.247737
0.398522	0.187521
0.382263	0.204486
0.344226	0.244258
0.309633	0.184856
0.302699	0.242624
0.340161	0.159054
0.364361	0.129131
0.283091	0.128455
0.266623	0.145139
0.282439	0.195006
0.273832	0.182847
0.209027	0.2125
0.21295	0.199967
0.163839	0.262421
0.18788	0.208172
0.216519	0.246867
0.293038	0.179832
0.370035	0.341455
0.333379	0.252922
0.308136	0.241706
0.326508	0.197967
0.223094	0.261888
0.256839	0.246233
0.298841	0.271727
0.214599	0.186333
0.274065	0.135788
0.399858	0.308218
0.300442	0.143186
0.284954	0.155307
0.310953	0.199339
0.244149	0.16337
0.365315	0.150771
0.256251	0.160543
0.312752	0.153512
0.36367	0.172551
0.375054	0.106553
0.238447	0.105369
0.451876	0.0709836
0.289848	0.136781
0.423023	0.142407
0.336296	0.216523
0.412373	0.166595
0.386345	0.100311
0.337362	0.157525
0.433603	0.103057
0.28992	0.157426
0.276435	0.217157
0.315842	0.164599
0.393038	0.155168
0.334056	0.169332
0.27157	0.0971777
0.253683	0.153977
0.28681	0.138388
0.25478	0.139683
0.365534	0.240405
0.326974	0.263612
0.336105	0.207353
0.336365	0.130574
0.283012	0.213472
0.413154	0.198382
0.430697	0.159547
0.347552	0.158327
0.352028	0.22591
0.404588	0.159025
0.343141	0.190759
0.295851	0.183777
0.424738	0.166363
0.386091	0.211623
0.431191	0.168228
0.40351	0.186815
0.507224	0.207478
0.317268	0.216597
0.512782	0.18541
0.344177	0.172333
0.434995	0.210084
0.331366	0.12287
0.390659	0.213504
0.391025	0.21522
0.208007	0.220117
0.344412	0.260465
0.42635	0.169423
0.30925	0.303754
0.302067	0.259535
0.360338	0.287587
0.268662	0.279344
0.295343	0.298203
0.353964	0.318508
0.286447	0.25729
0.307123	0.353533
0.25206	0.208516
0.314975	0.233197
0.359531	0.283466
0.362686	0.185211
0.210213	0.224464
0.277614	0.183096
0.516621	0.211178
0.475279	0.192393
0.317047	0.166291
0.438596	0.328369
0.419769	0.20423
0.355457	0.198071
0.393652	0.153961
0.359473	0.208624
0.275229	0.181034
0.305529	0.196102
0.340175	0.205447
0.358532	0.167791
0.26728	0.182123
0.481311	0.177088
0.318373	0.239198
0.431934	0.238667
0.407327	0.183649
0.491778	0.187076
0.339478	0.248416
0.288608	0.199805
0.389904	0.276751
0.421004	0.22928
0.30274	0.203159
0.354671	0.206789
0.331657	0.187875
0.436363	0.143115
0.450807	0.168728
0.444248	0.172904
0.296457	0.295108
0.32431	0.1529
0.32979	0.207494
0.299727	0.193308
0.320951	0.168944
0.424769	0.125413
0.388385	0.167847
0.310966	0.20127
0.258247	0.158563
0.316597	0.141948
0.329057	0.141239
0.397055	0.115123
0.323375	0.168122
0.416615	0.191721
0.411609	0.21534
0.254327	0.159394
0.318638	0.120776
0.291308	0.215513
0.324467	0.237914
0.315085	0.146506
0.422996	0.234194
0.269766	0.161488
0.33443	0.164522
0.305004	0.15557
0.318235	0.227906
0.353717	0.261121
0.312573	0.175656
0.219066	0.193904
0.224629	0.244791
0.329463	0.211064
0.389484	0.272355
0.428294	0.203967
0.322898	0.234074
0.321076	0.234985
0.318097	0.2411
0.179302	0.152752
0.310273	0.194916
0.362688	0.268002
0.318592	0.183234
0.300559	0.178489
0.353801	0.128356
0.364545	0.0963406
0.384504	0.20063
0.253975	0.164042
0.258321	0.183763
0.277712	0.163456
0.471939	0.154633
0.530438	0.160689
0.23797	0.174116
0.285772	0.245263
0.325273	0.190545
0.406963	0.188561
0.400629	0.246284
0.38613	0.184886
0.330336	0.172618
0.412911	0.146763
0.382919	0.257052
0.316552	0.177511
0.281111	0.180905
0.357973	0.209871
0.376901	0.239696
0.403253	0.251709
0.335468	0.223302
0.328606	0.204166
0.273012	0.20599
0.35702	0.18899
0.357777	0.196398
0.37722	0.190206
0.295874	0.133059
0.314859	0.218606
0.423563	0.210239
0.397547	0.249863
0.341677	0.149774
0.478419	0.131493
0.507782	0.149564
0.460307	0.239352
0.428068	0.187742
0.329229	0.171979
0.402178	0.091554
0.457398	0.171263
0.348941	0.238407
0.378414	0.189566
0.337171	0.194919
0.304429	0.136573
0.331904	0.169713
0.309148	0.169853
0.295857	0.144832
0.29875	0.11835
0.316033	0.0933365
0.353975	0.101139
0.369787	0.129606
0.365225	0.167991
0.334976	0.157935
0.339663	0.200271
0.385712	0.164008
0.347794	0.185281
0.476858	0.244493
0.403886	0.142077
0.356769	0.199389
0.438295	0.215647
0.370202	0.167433
0.373152	0.264748
0.406736	0.203661
0.250356	0.241919
	0.248522
	0.161106
	0.289327
	0.233273
	0.243149
	0.194
	0.197298
	0.208274
	0.202529
	0.169062
	0.144236
	0.286608
	0.167094
	0.18417
	0.145904
	0.127123
	0.171282
	0.251246
	0.194991
	0.162499
	0.0948865
	0.148902
	0.239655
	0.154677
	0.134667
	0.0968793
	0.181337
	0.239709
	0.250471
	0.229987
	0.243075
	0.205631
	0.243719
	0.280161
	0.186248
	0.275068
	0.258792
	0.317519
	0.219838
	0.222621
	0.236605
	0.293436
	0.109887
	0.157283
	0.162079
	0.203695
	0.086451
	0.106595
	0.0899643
	0.212891
	0.131447
	0.101186
	0.156894
	0.1263
	0.12625
	0.122307
	0.0942603
	0.100333
	0.153963
	0.133374
	0.168695
	0.140548
	0.113422
	0.11179
	0.12852
	0.124619
	0.0888036
	0.0301601
	0.170024
	0.14023
	0.0880572
	0.0445193
	0.0752408
	0.0319536
	0.140971
	0.155427
	0.0360925
	0.0732521
	0.114025
	0.117827
	0.124921
	0.106103
	0.0903618
	0.114538
	0.114964
	0.0765637
	0.181782
	0.179264
	0.246866
	0.289995
	0.175178
	0.210472
	0.167757
	0.182932
	0.152497
	0.247262
	0.234229
	0.227162
	0.186731
	0.164235
	0.204031
	0.208771
	0.212042
	0.213531
	0.173668
	0.137896
	0.191064
	0.188976
	0.114417
	0.208281
	0.212873
	0.145375
	0.0773611
	0.151868
	0.149187
	0.194296
	0.257977
	0.255099
	0.241228
	0.242123
	0.23592
	0.255772
	0.258357
	0.23986
	0.252141
	0.288019
	0.2398
	0.24993
	0.171281
	0.185536
	0.247227
	0.163276
	0.210129
	0.188511
	0.169145
	0.251671
	0.270715
	0.167364
	0.202161
	0.191341
	0.243755
	0.24783
	0.227302
	0.220346
	0.176133
	0.20704
	0.161789
	0.213522
	0.185034
	0.185922
	0.182253
	0.194404
	0.193081
	0.204323
	0.205365
	0.211351
	0.161988
	0.149571
	0.217253
	0.155601
	0.160017
	0.172
	0.239728
	0.191314
	0.249676
	0.228691
	0.220861
	0.256353
	0.229165
	0.185379
	0.18081
	0.213024
	0.197781
	0.275836
	0.216136
	0.224964
	0.233673
	0.177867
	0.289906
	0.23733
	0.274821
	0.253722
	0.219227
	0.433596
	0.320796
	0.372177
	0.406279
	0.328223
	0.374694
	0.328283
	0.266956
	0.400018
	0.412373
	0.358576
	0.345112
	0.29487
	0.2323
	0.448947
	0.345115
	0.318873
	0.319857
	0.27334
	0.350036
	0.370875
	0.430421
	0.428102
	0.354993
	0.30051
	0.380241
	0.315874
	0.365863
	0.25664
	0.377932
	0.287577
	0.259029
	0.306724
	0.32881
	0.267174
	0.272399
	0.323725
	0.302543
	0.256949
	0.309803
	0.247218
	0.209587
	0.2389
	0.336395
	0.326185
	0.268482
	0.271752
	0.212345
	0.261995
	0.297158
	0.249822
	0.241144
	0.17351
	0.199979
	0.247217
	0.168743
	0.135517
	0.190567
	0.272965
	0.307862
	0.172528
	0.110798
	0.108324
	0.159137
	0.304623
	0.217331
	0.196399
	0.151964
	0.157076
	0.198941
	0.155297
	0.203149
	0.228833
	0.271112
	0.194227
	0.188284
	0.264806
	0.27658
	0.260458
	0.187184
	0.207167
	0.229978
	0.283892
	0.31945
	0.273985
	0.288136
	0.309296
	0.244942
	0.290375
	0.211333
	0.201483
	0.185634
	0.138962
	0.314992
	0.296857
	0.360665
	0.237266
	0.188398
	0.272742
	0.282023
	0.259003
	0.235613
	0.249392
	0.271848
	0.267169
	0.296074
	0.235823
	0.228546
	0.260517
	0.258805
	0.172209
	0.242138
	0.242728
	0.338611
	0.3203
	0.190305
	0.299244
	0.259802
	0.189201
	0.210147
	0.277567
	0.229172
	0.149859
	0.26636
	0.255699
	0.259323
	0.274002
	0.261002
	0.289899
	0.244734
	0.304025
	0.283738
	0.22566
	0.216941
	0.271488
	0.28608
	0.239307
	0.197623

## Sheet: Avg Waveforms
Exemplary proximal ROIs					Exemplary distal ROIs
ROI1	ROI2	ROI3	ROI4		ROI1	ROI2	ROI3	ROI4
-0.207354	0.0277056	-0.0800552	-0.0941435		0.105245	-0.0066354	-0.0543844	0.164615
-0.116767	0.0609731	-0.0199396	-0.112927		0.154343	-0.0222252	-0.0327479	0.10718
-0.0270069	0.181055	-0.0185673	-0.0418782		0.121527	0.0158008	0.00714779	0.0286859
0.0107976	0.20909	0.0368401	0.116497		0.134784	-0.00870974	0.0069272	-0.000773505
0.0274619	0.191286	0.0407217	0.244326		0.0368174	-0.0417296	-0.0606413	0.0166818
0.164631	0.26722	0.101638	0.40424		0.0392076	-0.0128418	-0.11958	0.0960105
0.307911	0.431206	0.126556	0.530665		-0.00231306	0.1616	-0.0405608	0.144389
0.54278	0.640551	0.390394	0.724679		0.110406	0.319526	0.064026	0.180393
0.766222	0.75468	0.706048	1.01983		0.178777	0.470619	0.12417	0.200211
0.794768	0.756498	0.920421	1.28261		0.242124	0.529478	0.164524	0.171992
0.743914	0.60328	1.03979	1.27311		0.261873	0.522943	0.128362	0.139898
0.762737	0.495931	0.892998	1.25989		0.244114	0.484141	0.119959	0.111402
0.655921	0.394867	0.772266	1.12044		0.146362	0.471762	0.196432	0.128348
0.559151	0.589603	0.741978	0.958029		0.13947	0.438349	0.253087	0.191062
0.531387	0.579705	0.708514	0.969812		0.0996991	0.438716	0.192332	0.215445
0.506086	0.681809	0.749666	0.996896		0.150561	0.40001	0.130237	0.200857
0.579062	0.635677	0.713422	0.917338		0.239918	0.33497	0.0731906	0.126614
0.624947	0.502425	0.57256	0.948604		0.273904	0.199738	0.0474255	0.0955788
0.540233	0.336795	0.56959	0.869548		0.223999	0.147765	0.0650384	0.0946425
0.365155	0.406885	0.523759	0.691733		0.159623	0.163814	0.0201216	0.140455
0.184925	0.358405	0.444681	0.609081		0.0641071	0.18482	0.0116786	0.159602
0.0956243	0.295536	0.470486	0.637528		0.0318659	0.199915	-0.0285925	0.148646
0.103545	0.221985	0.295725	0.578732		0.00551504	0.183886	-0.0370813	0.0760835
0.0856709	0.10774	0.218575	0.576432		0.0116288	0.167795	-0.0404827	0.0319932
0.0782053	0.0355844	0.277523	0.514274		0.0456924	0.141386	-0.0143021	-0.011849
-0.0494761	0.0187128	0.300257	0.402661		0.0728731	0.157833	-0.0129706	0.00894781
-0.113581	0.139011	0.298593	0.270378		0.0973248	0.152422	0.0754572	0.0763363
-0.0523211	0.145115	0.273193	0.293129		0.076328	0.177513	0.106726	0.0514617
0.150865	0.179578	0.156068	0.348555		0.04841	0.22331	0.135783	0.0688048
0.278655	0.188083	0.18263	0.470911		0.0450204	0.259964	0.0695288	0.048528
0.405284	0.178487	0.266522	0.467048		0.0530432	0.271379	0.0284078	0.0377214
0.381815	0.169096	0.221208	0.416167		0.0587977	0.152227	0.0266156	0.0244773
0.258792	0.25943	0.157541	0.318073		0.0913734	0.114667	-0.0374068	0.00444559
0.145288	0.182405	0.0863811	0.228768		0.087568	0.131088	-0.0469369	-0.0525339
0.117471	0.118666	0.133224	0.176833		0.141876	0.123346	-0.0488053	-0.10271
-0.0457209	0.0860099	0.24233	0.176594		0.149613	0.115622	-0.0288696	-0.181935
-0.0749498	0.0903303	0.348511	0.126537		0.114171	0.105018	-0.0037762	-0.13949
-0.0368901	0.094933	0.320523	0.108372		0.0644782	-0.0370974	0.0370879	-0.0864308
0.0010313	0.179125	0.232974	0.13347		0.0920882	-0.0392844	-0.0229377	-0.0592865
0.0727958	0.109438	0.103572	0.1631		0.077816	-0.00773727	0.00948364	0.00870753
0.120932	0.0182834	0.093023	0.0925665		0.0846016	0.0210312	-0.00871946	-0.0102974
0.0501565	-0.0547071	0.0721313	0.0400844		0.0667075	0.0379051	0.0231417	-0.0262643
0.0102788	-0.0756247	0.0950162	0.00837183		-0.0194139	0.0146613	0.0406526	0.0338221
-0.0156373	-0.0245688	0.0733482	-0.0295211		-0.0577105	-0.0132688	0.0524195	0.0667751
0.0331181	-0.00368229	0.0573256	0.00431972		-0.064614	-0.0329415	0.0125376	0.0667911
0.0441837	-0.0696565	-0.0320708	0.0123902		-0.0321829	-0.0056948	0.0274352	-0.00591809
-0.0396884	-0.119103	-0.0453793	0.0138115		0.00622199	0.0405002	-0.0334605	-0.0518325
-0.0804401	-0.130583	0.0646289	0.014681		0.0494072	0.00522218	-0.0643632	-0.0128149
-0.052672	-0.0915448	0.0599406	0.00140475		0.0126055	0.0146123	-0.0400142	0.0160869
0.0234452	0.131399	0.0492314	0.0441696		0.0266063	-0.0047936	-0.0336145	0.0619371
0.0859005	0.151555	0.0564538	0.0526873		0.00267911	0.0325966	-0.0159848	0.109876
0.123597	0.136927	-0.0386531	0.0441901		0.00599392	0.0859063	-0.033894	0.133572
0.0683156	0.0860989	-0.103237	0.109041		0.00279448	0.103433	-0.0867264	0.105254
0.0323887	0.0753153	-0.0473733	0.162427		-0.0430152	0.0508171	-0.0843048	0.0534671
0.0472775	0.0182603	-0.0102782	0.182653		-0.0529165	0.0295798	-0.0331734	0.00998768
0.092724	0.0757717	-0.0208462	0.184811		0.0167956	-0.0316849	0.0357095	0.00596059
-0.0108083	0.0728127	0.00717786	0.157994		0.0728304	0.0138012	-0.00808103	0.0185886
0.0313063	0.094175	-0.0169143	0.0766969		0.0835887	0.00969615	-0.0334374	0.0576675
0.0371198	0.0526456	-0.0795193	0.0620702		0.0820423	0.074469	-0.0544899	0.0591691
0.0215676	0.0590199	-0.0567392	0.0310016		0.0107271	0.0796979	-0.0869148	0.0259176
0.029754	0.0333642	-0.00862512	-0.00108726		-0.0321729	0.108165	-0.0610668	0.0305047
0.0517576	0.00874519	-0.00795891	-0.0348866		-0.0278068	0.0792729	-0.00234281	0.0520084
0.0073912	0.00398006	0.00148798	0.0204271		-0.014324	0.102561	-0.0153822	-0.0177326
0.0633548	0.11428	-0.00913051	0.0431745		-0.00486577	0.107348	0.0292517	-0.0851345
0.0706589	0.0448983	-0.0403055	0.0577179		0.0311786	0.0571614	0.00786908	-0.0169429
0.0366563	0.0289781	-0.0848988	0.0573076		0.0200358	0.0113846	-0.0541012	0.0362948
0.0521191	0.0491839	-0.0824696	-0.0146986		-0.0255322	-0.0051356	-0.0447393	0.0458318
0.0359269	0.0194129	-0.0222739	-0.0195704		-0.0156131	-0.00741567	-0.0303953	0.0440742
0.0344172	0.00514421	0.026547	-0.00136828		0.00339813	0.00938174	-0.0391703	-0.00583272
0.0228626	0.140775	0.0512651	0.0341582		-0.0235586	0.0660569	-0.0383693	-0.0530857
-0.0636823	0.0643459	0.0767394	0.0291785		-0.00643081	-0.0284232	-0.038076	0.0102811
-0.102397	0.0575307	0.0142699	0.0730051		0.0611198	-0.0160847	-0.0209936	0.0450342
-0.144545	0.00894249	0.0892314	0.0668333		0.0779245	-0.0334959	0.00408973	0.0180526
-0.125551	-0.1068	0.0972505	0.138521		0.0912194	-0.0271413	-0.0211122	0.0265151
0.00309169	-0.127048	0.000681283	0.150689		0.0856841	-0.0369972	-0.0309878	0.0107827
0.082156	-0.033229	-0.0110295	0.15191		0.0107581	0.00744304	-0.0417403	-0.0341396
0.123856	0.0033225	-0.0130781	0.0538499		-0.033286	-0.0389203	0.0209346	-0.0614576
0.0944166	0.0816585	-0.0559582	0.0315208		-0.0192262	0.025895	0.0366463	-0.0353054
0.0183037	0.0663418	-0.0387779	-0.0328289		0.000149526	0.0220961	0.0369694	0.0124251
-0.0237174	-0.0174983	-0.0303781	-0.073971		-0.00542423	0.0240583	0.0160515	0.037164
0.0137448	-0.0193007	-0.141553	-0.0415521		0.00496122	0.0470012	0.00689391	0.065647
0.0167536	0.0800224	-0.124724	-0.0319976		0.0574776	0.0252129	-0.0470525	0.068722
0.0319953	0.115046	-0.108775	-0.0639571		0.0976596	-0.00964841	-0.0304878	0.0876814
-0.0042527	0.168647	-0.0693361	-0.0032285		0.114846	0.0423895	-0.0368542	0.122128
0.0194966	0.114729	-0.0523961	0.00783625		0.0946794	0.0455964	-0.00642601	0.145709
-0.00251333	7.6443e-06	-0.0281339	-0.0950208		0.0390111	0.0153311	-0.0145519	0.128972
-0.0126476	-0.0778873	-0.0123317	-0.077233		-0.0654272	0.0363713	-0.0947241	0.0970905
-0.0729808	-0.152831	-0.075082	-0.0889916		-0.0972885	-0.00523412	-0.117547	0.0604357
-0.155609	-0.137851	-0.0657402	-0.0569531		-0.08563	0.033552	-0.114878	0.0557284
-0.102624	-0.141181	-0.0741044	-0.0289743		-0.0353772	0.0461221	-0.121643	-0.0206077
0.0523232	-0.0982556	-0.0587671	0.0183528		-0.0158072	0.076076	-0.0654462	-0.0416125
0.158945	-0.0840489	0.0195402	-0.0676275		-0.00556907	0.0291547	-0.0165516	-0.0157402
0.238065	-0.0547072	0.0160087	-0.103447		-0.0781103	0.0391213	-0.0234616	-0.0696183
0.209159	0.00463749	0.0276535	-0.144049		-0.070721	0.00701805	0.0170397	-0.0813209
0.128051	0.060362	0.0767295	-0.216265		-0.0704698	0.0656944	-0.02394	-0.074544
0.0578879	0.0802119	0.0567593	-0.154236		-0.0269389	0.0518117	-0.037042	-0.0525951
0.0463801	0.0892279	0.0112594	-0.0842745		0.0110796	0.110504	-0.0866577	0.0411218
0.00243046	0.00106365	0.126191	-0.0662856		-0.043282	0.0504038	-0.0761885	0.131281
0.096307	0.0147792	0.129572	-0.0298854		-0.0970917	0.0560904	-0.0710581	0.158009
0.128613	0.023068	0.123141	0.00464119		-0.0332178	0.0167397	-0.0159126	0.124755
0.164153	-0.0452038	0.0705995	-0.0824558		-0.0146745	-0.0201521	-0.073401	0.0760697
0.105769	-0.0405972	0.0260714	-0.02049		0.0821619	-0.0102197	-0.021785	0.0194181
0.0932429	-0.0248782	-0.0677284	-0.0223131		0.0907881	0.00775091	-0.0431414	-0.0385243
0.134498	-0.0626827	0.0421296	0.00173077		0.054556	-0.0446324	-0.019867	-0.0184422
0.186226	-0.013584	-0.0038262	-0.000497796		0.0204563	0.0113523	-0.0149572	-0.011644
0.133289	-0.0311557	-0.0154867	0.00981017		0.0302266	0.0118745	0.0155865	-0.00712349
0.0528272	-0.0526418	-0.078607	-0.0339826		0.0273618	-0.00717391	0.0153595	0.0688634
-0.0610669	-0.0663727	-0.136274	-0.00565682		0.0691218	0.043126	0.00254077	0.0688929
-0.122197	0.0391584	-0.0802056	-0.0192845		0.0239086	0.0706907	0.0189409	0.063839
-0.149753	0.0770402	0.0493668	-0.0152163		-0.0193328	0.0704542	-0.0181595	0.0738694
-0.108912	0.0978185	0.00713238	-0.0303915		-0.0506513	0.0696702	-0.0915147	0.0178019
-0.0319357	0.0657963	0.0782422	-0.0760079		0.00388681	0.0289591	-0.0793587	0.00529657
0.0390229	0.0626093	0.00756843	-0.0745107		0.0385065	0.0259748	-0.0504597	0.00650759
0.105595	0.0253114	-0.0560135	-0.0564754		0.0724388	0.0249325	-0.0417772	-0.0346622
0.101699	-0.00752686	-0.0755676	-0.0865111		0.0156671	0.028864	-0.0126345	-0.0505761
0.0428588	-0.000344235	-0.0769497	-0.0742132		-0.075331	0.00389071	-0.00672876	-0.0557659
0.0655641	-0.031616	-0.0630351	0.0247339		-0.0586123	-0.0478567	0.0147694	-0.0363478
0.0518044	-0.0383693	-0.0165336	0.017303		0.0175484	-0.0659803	0.019156	0.0101586
0.0619748	-0.048391	-0.0053141	0.00905284		0.0771557	-0.0614246	-0.0107544	0.0172982
0.0437455	-0.0132397	0.029176	-0.0382358		0.0966894	-0.0217339	-0.0439277	0.00315532
0.0596251	-0.0119711	0.0172051	-0.0617063		0.0549223	-0.0271803	-0.0644277	-0.00051982
0.0673694	0.0329892	-0.0354223	-0.0279365		-0.0439333	-0.0526976	-0.0415752	-0.0387828
0.0565228	0.0373172	-0.0122111	0.0324653		-0.0456063	-0.115867	-0.0359769	-0.0230799
0.0189479	-0.00539958	0.0672836	0.0113149		-0.0359833	-0.131436	-0.0437667	-0.0129963
0.0428609	-0.117521	0.0721973	0.0138989		-0.0260681	-0.0580999	-0.0259559	0.00579496
0.047271	-0.171935	0.0538446	-0.0146736		-0.00113243	0.0289711	-0.00188159	0.00437627
0.0829533	-0.149598	0.0511247	-0.0387465		-0.0264841	0.0736172	0.102662	0.0480772
0.0309151	-0.0990717	-0.00141271	-0.0437102		-0.067417	0.117867	0.130069	0.0248213
-0.0117779	0.0418968	-0.072392	0.0193269		-0.0648913	0.101838	0.0682571	0.0657964
-0.0539371	0.110153	-0.0665468	0.0391518		-0.0373646	0.0506556	0.0371834	0.0914018
-0.0749371	0.154904	-0.0365741	0.0633881		0.0465792	0.151494	-0.0331925	0.0889242
-0.0894069	0.0851745	-0.0394145	-0.00407664		0.11423	0.141697	-0.0428775	0.046221
-0.0441645	0.0736559	0.0488754	-0.0365799		0.0840819	0.111735	0.0154776	0.025264
-0.0433692	0.0387599	-0.0102278	-0.0254823		0.137706	0.0865832	0.00833035	-0.0136361
0.0472966	0.0252262	-0.0340046	-0.00892312		0.101284	-0.0141988	0.0444396	-0.00233885
0.0898683	0.00908174	-0.032818	0.0568483		0.0634872	-0.129134	0.0525392	0.00650462
0.0832001	-0.00408446	-0.00182886	0.0636641		0.0381221	-0.133343	0.000764718	0.0413271
0.0128219	-0.0404541	-0.0779323	0.0240149		-0.0257403	-0.182269	-0.0138432	0.0338223
-0.0462292	-0.0626093	-0.101448	0.078454		-0.0623251	-0.141066	-0.0217188	0.0700291
-0.110128	-0.0276939	-0.199349	0.112922		-0.0247161	-0.0739145	-0.0742944	0.110807
-0.0513898	0.0320879	-0.0953966	0.128799		-0.0200559	-0.0477951	0.00858721	0.0895993
-0.00552429	0.0562775	0.00914129	0.204376		-0.0421131	0.0473549	0.0564472	0.0997363
-0.0120183	0.0396882	0.139595	0.169988		-0.0664674	0.0548131	0.0611199	0.0770833
0.010904	0.0283206	0.16303	0.094202		-0.0369486	-0.00860437	0.0466341	-0.0419751
0.0241086	-0.0877775	0.207544	0.020498		-0.0127052	0.0205232	-0.00987217	-0.0713996
0.0433585	-0.0787615	0.124894	-0.0652237		0.00895161	0.0189603	-0.132632	-0.095021
0.097872	-0.0220469	-0.0153215	-0.0615359		0.0700985	-0.0132025	-0.136273	-0.0795156
0.1044	0.0158583	-0.0704928	-0.0186165		0.107006	-0.0158094	-0.102922	-0.00570481
0.0305409	0.0285989	-0.0603855	0.0310266		0.135698	-0.0519869	-0.0443204	0.0241518
-0.0282976	0.0339134	-0.000264958	-0.012181		0.131015	-0.0768426	0.0225325	-0.0103452
-0.0580878	-0.0319796	0.147945	0.0185281		0.0684773	-0.0279336	0.060546	-0.0121373
-0.0821965	-0.00736451	0.076855	-0.0386626		-0.0295415	-0.0157174	0.031044	-0.0229332
-0.110154	0.0365863	-0.0107183	-0.0836185		0.0044228	0.0183023	0.0331268	0.0126814
-0.060261	0.0666047	-0.00209798	-0.0890625		0.00731266	-0.00508785	-0.00607916	0.00185369
-0.0532589	0.100893	-0.033789	-0.0548074		-0.0131931	-0.046207	0.00547064	-0.0179966
-0.0640671	0.117003	-0.00820404	-0.102343		-0.0185023	-0.0738906	0.0225299	-0.0268189
-0.0468734	0.125091	0.0443581	-0.0552168		-0.0944012	-0.0707124	0.0540023	-0.0181141
-0.0390654	0.0752224	-0.0369449	-0.0655367		-0.136987	-0.0472204	0.00908488	-0.0109295
-0.0678478	0.042651	-0.00361647	-0.0162072		-0.0383755	0.046469	-0.00182907	0.00597135
0.0463758	-0.0348998	0.0829454	0.0209538		-0.0160968	0.0789394	0.0100403	-0.048984
0.0563187	-0.076932	0.000275031	0.108849		0.0355423	0.0453381	0.0396609	-0.108649
0.0303644	-0.076522	-0.0663116	0.0826435		0.0928251	-0.0203937	0.044591	-0.140767
0.0454403	-0.0590933	-0.0739046	0.0867791		0.0656372	-0.0624007	0.0317364	-0.136447
0.0448768	-0.066245	-0.115102	0.0142798		0.0112034	-0.0384597	-0.027512	-0.11285
0.0202684	-0.0570202	-0.066532	-0.0157769		-0.0271268	-0.0129151	-0.0417671	-0.0334039
0.0715965	0.042268	-0.0281297	-0.0827983		-0.0532989	0.00710798	-0.0500908	-0.00449406
0.0860728	0.0798793	-0.0387135	-0.0818449		-0.0524779	-0.0301393	-0.0338122	0.0105398
0.0300008	0.128491	0.0355974	-0.055773		0.0270291	-0.00834421	-0.00864612	-0.0441808
-0.00313425	0.0572406	0.113279	0.0152961		0.0683031	-0.0121736	0.0226057	-0.0988696
-0.0193456	0.0207666	0.146357	-0.0124736		0.00694098	-0.00389411	-0.00138748	-0.0745336
-0.1037	-0.0742786	0.110088	0.00501368		-0.00594272	0.0256007	-0.0205727	-0.0592227
-0.14516	-0.069761	-0.00801418	-0.015455		0.00681488	0.0685428	-0.078536	0.00740887
-0.0322079	-0.0512609	-0.121549	-0.00502618		-0.00929534	0.0494635	-0.0788424	0.038207
0.0705865	0.0597703	-0.182285	0.0441735		0.0289987	0.0917543	-0.0784103	-0.0219143
0.137324	0.0516284	-0.186273	0.0774082		0.00143343	0.0424203	-0.00956937	-0.0231171
0.128243	0.115344	-0.0999463	0.0691791		-0.0499548	-2.37245e-05	-0.0428047	0.044005
-0.0139489	0.119629	0.0155215	0.0899156		-0.0503548	0.0177357	-0.0260684	0.0275283
-0.133903	0.144136	0.172959	0.0622258		-0.0287795	0.0259424	-0.0424722	0.0652152
-0.128396	0.112211	0.217767	0.0819336		-0.0021664	0.054031	-0.101134	0.0149511
-0.0937128	0.107898	0.153004	0.0595206		0.0113822	0.0704287	-0.113171	-0.0707278
-0.0755792	0.0633829	0.120767	0.056359		-0.00671125	0.0375278	-0.0908394	-0.0837851
-0.0556128	0.0947939	0.0833961	0.0224674		-0.0148217	0.0136243	-0.0756122	-0.0526751
-0.0822049	0.0756789	0.0422188	-0.0401967		0.0174419	-0.0260394	-0.0855545	-0.0412393
-0.0148399	0.132931	0.0687557	-0.0784162		-0.0174989	-0.0159096	-0.0588603	0.0191059
0.00784624	0.0638005	0.0264917	-0.027548		0.0158255	-0.01626	-0.0849287	0.0119505
-0.033135	0.0486656	-0.0435967	-0.0309393		-0.00984483	0.00683575	-0.0895948	-0.0095266
-0.0310427	-0.0279454	0.00684181	0.0603643		-0.0293558	0.0487439	-0.0485757	-0.0116175
-0.00783782	-0.00147372	0.0687004	0.0636511		-0.0131529	0.029452	-0.0230997	0.0226635
-0.0286356	0.0293029	0.0417985	0.0223841		0.0408489	-0.0243476	-0.0651732	0.032966
0.0557466	0.147072	-0.0245825	0.0109304		-0.00357085	-0.0801979	0.0665507	-0.0107534
0.0272301	0.187774	-0.10888	-0.00173176		0.0209079	-0.170451	0.089123	-0.0248322
-0.0304048	0.18905	-0.0883593	-0.0152467		-0.0154192	-0.176045	0.0280162	0.00723522
-0.00277068	0.0696991	-0.0027842	-0.0106179		-0.0217796	-0.121605	0.0243085	0.00126656
-0.0108763	-0.00647871	0.0177666	-0.0517762		0.018701	-0.112266	0.00970357	-0.0239521
-0.0679668	-0.0395683	-0.0325372	-0.0520348		0.000664268	-0.055502	-0.0780122	0.0272827
-0.0723493	-0.0141409	-0.0961233	-0.06128		-0.0833264	-0.042029	-0.0338921	-0.0346065
-0.0678244	0.00447123	-0.123231	-0.0545225		-0.0537648	-0.0828573	-0.0654372	0.0442502
-0.0475432	-0.0200666	0.0391694	-0.00597526		-0.0523401	-0.0760078	-0.0674964	0.0707438
-0.0238556	-0.0454282	0.122831	-0.0345017		-0.0257834	-0.0907238	-0.0619441	0.0342626
0.060414	-0.00166709	0.0744259	-0.0364292		0.0545379	-0.113355	-0.038706	-0.0354384
0.0323482	0.00101336	0.00801346	0.00173179		0.0489459	-0.0848504	-0.0721626	0.0348758
0.0347531	-0.00826178	-0.101949	0.0197875		0.00283516	-0.116831	-0.0673414	0.0203649
0.0825091	-0.0152666	-0.120652	0.117857		0.0395667	-0.181621	-0.0530368	0.053619
0.0626488	-0.0682216	-0.028796	0.142323		0.00364222	-0.117158	-0.0270178	-0.00115228
-0.00315974	-0.0989518	-0.0299628	0.135578		0.0467007	-0.0779313	-0.0815734	-0.0828998
0.0502777	0.0184381	-0.0165593	0.101561		0.0730223	0.00551784	-0.126059	-0.140725
-0.00194564	0.0584127	-0.0565089	0.0480665		0.0748378	0.0662282	-0.121673	-0.0902791
4.03412e-05	0.0300109	-0.0682189	0.000259059		0.114455	0.0178565	-0.0594027	-0.0738826
0.0412535	-0.027899	-0.0225736	0.0407115		0.125226	-0.0233153	0.0229121	-0.00783279
0.112756	-0.00296285	-0.0245677	0.0524406		0.0633377	-0.00600943	0.0450291	0.0397696
0.12197	-0.0382146	-0.086622	0.0456543		0.081076	-0.0550444	0.0160867	0.0127613
0.107119	0.0284985	0.0168344	0.0908188		0.0643098	-0.0552264	-0.0746012	0.0297179
0.0368476	0.0517096	0.0196145	0.0656875		0.0175953	-0.0895215	-0.11385	0.117207
-0.0105063	0.0156532	0.0525226	0.0409376		-0.00416312	-0.128286	-0.156803	0.0747468
-0.0879375	0.0276786	0.0905392	0.0474564		-0.0126556	-0.152864	-0.143053	0.0846437
-0.0515174	0.122426	0.0526275	0.099989		-0.0414619	-0.13572	-0.10839	0.0758241
0.00830549	0.128317	-0.0463364	0.0310605		-0.0341994	-0.0600387	-0.0165658	-0.00717716
0.0237641	0.0760037	-0.0254495	0.0439893		-0.00698722	-0.0194941	-0.00956333	-0.0496002
0.0216527	0.0651427	-0.0299273	-0.0308308		0.00170667	0.0390259	-0.0015459	-0.0125322
0.00626849	0.0520461	-0.0660457	-0.038144		0.00740714	0.137194	-0.0346562	-0.0519656
-0.019218	0.156227	-0.0485599	-0.0044161		0.0188662	0.190554	-0.0587906	-0.0424153
-0.0513898	0.149756	-0.0449087	0.0274766		-0.0154889	0.231563	-0.0510801	-0.00935057
-0.00467586	0.139329	-0.00350584	0.0277691		-0.0583504	0.237883	-0.00274569	-0.0784541
0.0342577	0.0654599	0.0080242	-0.0034372		-0.0457244	0.124876	-0.00230458	-0.0976936
0.0150418	0.0121258	0.0971308	-0.0317545		0.00836788	0.0426568	-0.0321922	-0.0745844
0.0230773	-0.0511836	0.151596	-0.0227265		0.0232752	-0.0633442	-0.00276174	-0.071264
0.0521553	0.0617197	0.151822	0.0457626		0.00521569	-0.119662	0.0136813	-0.0431703
0.075373	0.0682563	0.168571	0.054184		-0.0510654	-0.112131	0.0185977	-0.00627301
0.0784817	0.129249	0.149297	0.0401968		-0.0496994	-0.128146	0.0146927	-0.0185783
0.0210701	0.131071	0.120702	-0.020205		-0.0272669	-0.0917577	0.0520697	0.0110304
-0.0658639	0.12774	0.0553877	0.0580733		0.0184662	-0.0526024	0.0366316	0.0493866
-0.156423	0.0498955	0.0500785	0.0106339		0.00190808	-0.0100907	0.0451865	0.0609639
-0.159149	0.0149686	0.0588391	0.032039		-0.00567786	0.00749391	0.0168973	0.0580115
-0.132353	0.0142686	0.0443639	-0.023726		-0.0316105	0.00656534	-0.0523878	0.0592809
-0.112386	-0.013731	-0.029881	-0.0903255		-0.0232081	-0.0156904	-0.0613409	0.0102464
-0.0704781	0.0151234	0.0348123	-0.132107		-0.0279769	-0.0488495	-0.043738	-0.0179779
-0.0556319	0.0700046	-0.00674091	-0.074327		-0.00639461	-0.063324	-0.0294102	0.00719012
-0.107309	0.000858653	0.0205013	-0.147838		0.0119292	-0.127298	-0.0280656	0.0597668
-0.0547792	-0.163015	0.0836819	-0.100144		-0.0495997	-0.0402556	-0.131004	0.0130656
0.00502668	-0.0367758	0.0729331	0.198598		0.0195269	0.217356	-0.00811931	0.041298
0.360728	0.261901	0.146457	0.694858		0.375639	0.910216	0.456005	0.271128
0.840098	0.830108	0.37891	1.29438		0.816509	1.61317	1.00597	0.701479
1.19576	1.23755	0.715987	1.80236		1.21066	1.99353	1.42853	1.11692
1.30882	1.34196	1.01056	2.02655		1.43085	1.84126	1.6391	1.38955
1.22727	1.07054	1.09492	1.94348		1.22522	1.5303	1.43275	1.27462
0.926277	0.797776	1.03597	1.66671		0.919643	1.12232	1.23748	1.03504
0.78386	0.559604	1.11299	1.56221		0.792661	0.999057	1.15216	0.852437
0.759247	0.57547	1.27275	1.54783		0.674569	0.943658	1.06537	0.776138
0.82909	0.590009	1.42515	1.54556		0.600084	0.840682	0.925049	0.694419
0.868402	0.650901	1.39918	1.66858		0.606223	0.697186	0.894061	0.67194
0.920204	0.655883	1.25793	1.77741		0.519865	0.601709	0.83436	0.643526
0.894078	0.633372	1.09783	1.60202		0.454881	0.553523	0.797978	0.639075
0.73567	0.577617	1.13749	1.62042		0.453004	0.558437	0.731859	0.59287
0.672467	0.638861	1.25893	1.6577		0.414828	0.558177	0.670911	0.591921
0.648101	0.687545	1.3148	1.58947		0.422023	0.636044	0.564842	0.540192
0.645239	0.736161	1.10158	1.52105		0.476676	0.618738	0.506412	0.558224
0.782099	0.866063	1.02604	1.58148		0.472918	0.586247	0.485971	0.590077
0.888054	0.84011	0.964198	1.45042		0.520491	0.589922	0.468582	0.550598
0.836315	0.780313	0.932993	1.3381		0.550667	0.614864	0.482949	0.468437
0.75138	0.648642	0.990359	1.43305		0.49558	0.647495	0.592314	0.442954
0.624347	0.604355	1.15516	1.43621		0.53413	0.74885	0.602102	0.358868
0.533486	0.565367	1.10784	1.49345		0.556784	0.783819	0.560098	0.390645
0.572202	0.667928	0.996859	1.64891		0.576203	0.79698	0.484067	0.473238
0.643984	0.714678	0.845854	1.58046		0.671355	0.88642	0.356137	0.515162
0.747334	0.739406	0.678466	1.62337		0.735747	0.896301	0.314669	0.555055
0.600713	0.711905	0.595165	1.6686		0.651778	0.890746	0.293728	0.55279
0.504	0.780258	0.580169	1.67135		0.572483	0.847316	0.347353	0.393538
0.377764	0.803814	0.670703	1.6847		0.502068	0.776297	0.36524	0.326451
0.44776	0.911097	0.613528	1.59936		0.458417	0.65337	0.410971	0.289631
0.549295	0.941019	0.71996	1.42164		0.455184	0.698743	0.382221	0.245266
0.680166	0.840528	0.917046	1.4597		0.515259	0.661721	0.433863	0.231347
0.708681	0.733275	0.981073	1.3639		0.499859	0.670687	0.373106	0.241586
0.76003	0.697528	0.99372	1.33902		0.456543	0.627383	0.294136	0.239978
0.803506	0.606939	1.08631	1.28047		0.430613	0.516312	0.213625	0.316981
0.727801	0.725652	1.0207	1.20544		0.375146	0.510743	0.0959491	0.316968
0.567695	0.762888	0.960683	1.25819		0.293558	0.585465	0.0228084	0.280001
0.502056	0.866725	1.0153	1.21111		0.33728	0.518072	0.0228515	0.244555
0.593894	0.954966	0.867681	1.21493		0.360908	0.572973	0.0491082	0.207177
0.619278	1.05355	0.876025	1.26398		0.336339	0.528293	0.0885586	0.200972
0.650635	0.916195	0.916316	1.31987		0.304077	0.429188	0.123389	0.195664
0.507572	0.883349	0.786583	1.3365		0.264051	0.389342	0.0709986	0.0864947
0.50451	0.724062	0.632397	1.27699		0.170344	0.348526	0.0717102	0.0440179
0.551658	0.611727	0.513483	1.19805		0.143706	0.25728	0.0931162	0.0673138
0.668288	0.567193	0.36144	1.15127		0.161845	0.35015	0.159152	0.127126
0.700896	0.630606	0.44163	1.18228		0.148122	0.363879	0.177032	0.134199
0.744087	0.646755	0.502082	1.17086		0.156172	0.393071	0.0542158	0.151867
0.741499	0.770419	0.588278	1.1617		0.142176	0.339159	-0.00899295	0.0921008
0.734003	0.80994	0.824071	1.07459		0.164841	0.222854	0.0450159	0.129427
0.647892	0.854781	0.85515	1.16063		0.218538	0.124515	0.10171	0.130291
0.566402	0.976773	0.882583	1.13714		0.233857	0.0970834	0.140528	0.162138
0.483612	1.00476	0.902048	1.13473		0.206303	0.14619	0.126325	0.0609188
0.42067	0.856115	0.781012	1.06814		0.238802	0.33165	0.0212802	0.156807
0.380435	0.614972	0.76854	1.07773		0.27978	0.51794	0.102517	0.249302
0.433047	0.484633	0.782484	1.092		0.374445	0.62764	0.197874	0.361343
0.42717	0.489069	0.683419	1.07157		0.345128	0.688875	0.228941	0.351492
0.457026	0.596538	0.627881	1.03408		0.305529	0.600766	0.218423	0.321624
0.51808	0.713359	0.682407	0.956501		0.271312	0.541535	0.0774932	0.15219
0.491261	0.629744	0.655856	0.940703		0.256314	0.509216	-0.0318121	0.176568
0.508786	0.459995	0.789972	1.08887		0.340508	0.422845	0.0693709	0.157694
0.649817	0.472809	0.741678	1.13259		0.370868	0.329056	0.0538338	0.134097
0.774083	0.47694	0.724958	1.02819		0.307555	0.291877	0.0281903	0.0664929
0.784377	0.595881	0.632301	0.956955		0.291207	0.181633	-0.0219303	0.0576439
0.679337	0.699474	0.613853	0.920137		0.197952	0.12456	-0.109452	0.0707866
0.558317	0.616338	0.488433	0.834177		0.118698	0.106785	-0.0955913	0.123595
0.40566	0.474778	0.473111	0.805148		0.149646	0.0878108	0.00910151	0.136906
0.460341	0.459097	0.384671	0.726067		0.18044	0.166011	0.0345144	0.0939434
0.688138	0.497076	0.442798	0.749877		0.20891	0.297717	-0.00920996	0.050056
0.732702	0.600367	0.452299	0.966414		0.252805	0.42948	-0.078908	0.0108118
0.652955	0.713422	0.468367	1.20604		0.230716	0.431767	-0.0577797	0.0268829
0.585875	0.719583	0.3851	1.34679		0.200141	0.355741	0.00496478	0.0676073
0.433445	0.624209	0.390449	1.4279		0.215589	0.236225	0.0305261	0.090703
0.328618	0.606506	0.568898	1.43491		0.20741	0.216064	0.101281	0.0558138
0.286509	0.533125	0.741932	1.46924		0.164759	0.146676	0.139358	0.105286
0.243617	0.512261	0.881458	1.42924		0.190819	0.227603	0.126952	0.0975865
0.326698	0.602928	0.906081	1.34282		0.223503	0.258848	0.0946091	0.066063
0.455678	0.592964	0.863997	1.35937		0.230216	0.293082	0.0496063	0.0895937
0.531974	0.519146	0.809175	1.41805		0.241562	0.210782	-0.0274893	0.118213
0.58952	0.520121	0.714719	1.31025		0.16513	0.176123	-0.00414628	0.159367
0.534568	0.435252	0.598715	1.20153		0.0671249	0.138794	0.0566542	0.217551
0.547528	0.419684	0.504149	0.952696		0.0450454	0.179543	0.0688727	0.221325
0.606881	0.382776	0.443448	0.704642		0.0381175	0.237742	0.0175929	0.192973
0.511661	0.425578	0.577184	0.655341		0.107274	0.325773	0.00430673	0.17576
0.460065	0.461712	0.627472	0.828616		0.0923798	0.358237	-0.0121202	0.110494
0.478075	0.533206	0.549094	0.886309		0.0535136	0.396642	0.0538535	0.0717276
0.384505	0.615406	0.564682	0.895822		0.0333015	0.420854	0.0635218	0.00745402
0.343113	0.593258	0.682994	0.849457		0.115318	0.445449	0.0446662	-0.041402
0.37679	0.516334	0.762028	0.682614		0.133604	0.440885	0.0160641	-0.0626255
0.396508	0.482989	0.870945	0.488691		0.208487	0.401062	0.0267438	-0.0572196
0.518114	0.352216	0.807479	0.55961		0.219024	0.3189	0.0267146	-0.0836784
0.617124	0.271904	0.661928	0.64002		0.176119	0.209817	0.0384558	-0.0381186
0.621442	0.278731	0.64368	0.798973		0.129579	0.0506981	-0.0324015	-0.0144013
0.557327	0.334242	0.708393	0.988433		0.12278	0.0606951	-0.0476753	-0.0439488
0.504591	0.446948	0.735581	1.12402		0.061113	0.0919107	-0.0281514	-0.0163485
0.490852	0.533639	0.654624	1.0793		0.0835499	0.107101	-0.0186779	0.0448529
0.424038	0.464992	0.636047	1.01655		0.155225	0.180126	0.0453813	0.0785872
0.383652	0.46312	0.537405	0.799382		0.140674	0.186238	0.0233698	0.157129
0.297645	0.418628	0.502703	0.702467		0.141366	0.205356	0.00657744	0.159858
0.284855	0.363329	0.452481	0.548172		0.174257	0.315182	-0.0328593	0.0964559
0.231922	0.380316	0.352885	0.631757		0.160308	0.274477	-0.0067717	0.0795952
0.205931	0.36172	0.341144	0.84184		0.201916	0.220565	0.00825761	0.0703408
0.258929	0.371235	0.491402	1.14765		0.273822	0.209786	0.12019	0.0406469
0.299166	0.385735	0.572905	1.34025		0.251957	0.16184	0.208046	0.0712876
0.34081	0.388017	0.644185	1.54645		0.234886	0.27998	0.264092	0.129329
0.383541	0.400561	0.628092	1.45177		0.247873	0.391366	0.225845	0.191597
0.385978	0.40222	0.454573	1.32908		0.172778	0.304941	0.216433	0.202588
0.426517	0.304754	0.497158	1.27617		0.124645	0.187778	0.177293	0.13794
0.574554	0.317413	0.516357	1.20634		0.101146	0.142435	0.212568	0.100083
0.554898	0.325516	0.686015	1.14426		0.0596883	0.16101	0.217975	0.0475332
0.599116	0.408838	0.776309	1.10711		0.0477702	0.274727	0.185218	0.0975787
0.613099	0.529179	0.818462	1.01685		0.126407	0.317713	0.0744423	0.136876
0.490197	0.637383	0.815916	1.02029		0.189141	0.240571	-0.0166803	0.159191
0.527341	0.542833	0.871583	1.08689		0.227476	0.214483	-0.00524242	0.0987814
0.49172	0.340071	0.799637	1.00311		0.190826	0.173833	0.0667515	0.0919008
0.380988	0.218844	0.776808	1.01221		0.141115	0.161178	0.125548	0.0347373
0.313027	0.125528	0.724853	0.858141		0.122536	0.221842	0.203545	0.0323213
0.306444	0.174913	0.635697	0.74393		0.149687	0.229142	0.18064	-0.0116916
0.228077	0.292856	0.514764	0.695349		0.193828	0.219604	0.121274	0.0271366
0.285217	0.253895	0.444366	0.617782		0.199002	0.259173	0.0538207	0.0692158
0.231952	0.12675	0.332138	0.483187		0.145877	0.166366	0.092032	0.122616
0.14621	0.0634989	0.304594	0.423663		0.0736526	0.175356	0.125617	0.114151
0.0627934	0.0288117	0.373796	0.272443		0.0287765	0.167209	0.168073	0.0855188
0.00331498	0.0795311	0.390235	0.236775		0.00231755	0.108318	0.199328	0.0518217
-0.0350615	0.139564	0.272584	0.19327		-0.0148443	0.0532673	0.209619	0.0487788
-0.0511963	0.172221	0.190821	0.132266		-0.0067878	0.00576616	0.127703	0.10626
-0.0749179	0.189812	0.154662	0.0728878		-0.0240128	-0.0557773	0.104126	0.19108
-0.0767062	0.136617	0.0674487	0.0107502		-0.0431123	-0.0627884	0.109428	0.164197
-0.0822326	0.0220507	0.0372258	-0.0539463		-0.0235945	-0.115158	0.0466597	0.0951146
-0.0992945	-0.0249013	0.0420289	-0.0024632		0.071901	-0.0676415	0.0410877	0.0935864
-0.106552	-0.0353137	0.0113847	-0.0359988		0.0922915	-0.0294608	0.0154347	0.0486508
-0.121258	-0.0464183	0.119946	-0.0615065		0.116017	-0.00374463	0.0329291	0.145059
-0.0745756	-0.0614528	0.206768	0.00737555		0.0734565	0.013563	0.00408314	0.2507
0.0100258	-0.103361	0.0818992	0.0706673		-0.0155675	0.02264	0.0330352	0.24532
0.0626403	-0.176491	0.00421283	0.076973		0.00227486	0.00052198	-0.0176625	0.174577
0.00318955	-0.10562	-0.0510147	0.171141		0.0277732	0.0145051	-0.0258711	0.122979
-0.0590702	-0.0602306	-0.0578316	0.135903		0.0608396	0.000829764	-0.0086599	0.047424
-0.0956074	-0.123397	0.0105038	0.0402173		0.0800769	-0.0447974	0.0297726	0.0914768
-0.0300922	-0.0719888	0.00720353	0.0281786		0.0557904	-0.0711751	0.0842953	0.0716345
0.0403603	-0.0360447	-0.0189273	-0.0343434		0.0377924	-0.0555511	0.15304	0.0892575
0.0804295	-0.00381752	-0.121342	-0.133429		0.0717905	-0.00830162	0.160332	0.0401643
-0.0353188	0.0572639	-0.114185	-0.0145312		0.0632933	0.00924897	0.123848	0.00317378
-0.0565547	-0.0136034	-0.0465766	0.0565383		0.0515153	0.0318976	0.108994	0.0127988
-0.0117225	-0.031879	-0.10862	0.0595825		0.0133793	0.0289218	-0.00364346	0.0510696
0.0198176	0.00572442	-0.116424	0.11058		-0.0385267	0.0233611	-0.070728	0.0785314
0.021153	0.0255357	-0.0804004	0.0680164		-0.0405504	0.00204569	-0.0500605	0.107343
0.00905402	0.0868492	-0.0713095	0.00711246		-0.079715	0.010854	-0.060866	0.10981
-0.0382234	0.106703	-0.058507	-0.021477		-0.0921103	-0.00718801	-0.0159126	0.0978802
-0.0804316	0.0596116	-0.0287201	-0.0164673		-0.0910229	-0.0679987	-0.0227171	0.0464025
-0.0765828	0.116203	-0.0723218	-0.0153256		-0.0270698	-0.114787	-0.0114707	0.00465107
-0.0726172	0.00201896	-0.0972858	0.0286768		-0.0187308	-0.129129	0.00281071	-0.0116732
-0.111328	-0.0239499	-0.066186	0.0219528		-0.0162499	-0.0899363	0.037213	-0.0609852
-0.155462	-0.0274658	-0.0219684	0.0320555		-0.0325006	-0.0878924	0.00213902	-0.0272454
-0.125814	-0.0698113	-0.0572503	-0.0331933		-0.00366464	-0.0309215	0.0644455	0.0269925
-0.162424	-0.0940242	-0.0822994	-0.0437433		0.0641592	-0.00751276	0.046447	0.0139059
-0.172299	-0.0452464	-0.0780116	-0.0499151		0.102399	-0.0429541	0.058352	0.0196423
-0.0451171	-0.0708788	-0.126411	-0.00889009		0.0569125	-0.0359157	-0.00878863	0.0465918
-0.0361502	-0.0458033	-0.0488448	-0.0495177		-0.0143982	-0.0271735	-0.0332919	0.0499921
-0.13695	-0.0204495	0.00695815	-0.0708854		-0.0565882	0.0227423	-0.0320791	0.0903939
-0.0842973	-0.0652316	0.0436323	-0.0360198		-0.0270129	0.129556	-0.00551599	0.0806703
-0.0383935	0.033577	0.0414384	-0.0163415		0.0184081	0.124247	0.0316643	0.0577265
-0.0287334	0.128537	0.00570067	0.0197492		0.0429275	0.04116	0.0484894	0.041362
0.0376876	0.0920282	-0.031525	0.0956732		0.023186	0.0110037	0.00709121	0.0410872
0.0356632	0.0298716	0.0348816	0.0900365		-0.00590111	-0.0591356	-0.00588545	0.0125508
-0.0607713	0.0170845	0.0924276	0.0222373		0.0342767	-0.0176782	0.0153489	0.000722842
-0.0980102	-0.0283902	0.155022	-0.0272175		0.0605324	3.3902e-05	-0.0252019	-0.0394681
-0.156115	0.0992148	0.165355	-0.0659676		0.0690091	0.00158808	-0.0754633	-0.0352144
-0.168988	0.162489	0.0326167	-0.165459		0.0538299	0.00287886	-0.12185	-0.0118066
-0.158577	0.113743	-0.0468127	-0.117321		0.0696375	5.27129e-05	-0.10397	0.0449329
-0.062602	0.0881914	-0.106953	-0.0886901		0.120892	-0.00805159	-0.0410579	0.076387
0.0173978	0.124016	-0.115698	-0.0642283		0.132245	0.000173666	0.0698655	0.0861935
0.0978486	0.100348	0.00161764	-0.0151664		0.0716387	-0.0435659	0.106759	0.092325
0.0658107	0.0893749	0.0789234	0.0393945		0.0440059	-0.0239527	0.111023	0.068453
0.0351401	0.0696334	-0.00606548	0.0151289		-0.043397	-0.0292242	0.0363596	0.0471414
-0.0791877	0.029303	-0.0203104	-0.0100983		-0.0564296	-0.0879689	-0.0275776	0.0124923
-0.16556	-0.0165004	-0.0622185	-0.0860018		-0.0347774	-0.10071	-0.0484232	-0.0177618
-0.17282	-0.08261	-0.124723	-0.131619		-0.00274433	-0.113188	-0.00609292	-0.0615561
-0.177423	-0.173377	-0.0432151	-0.124196		0.0120589	-0.113056	-0.0216629	-0.0480746
-0.145968	-0.160706	-0.00253393	-0.0800845		0.043271	-0.019827	-0.0169962	-0.0326356
-0.086515	-0.0940048	-0.000455633	0.0263863		0.0215895	0.0329727	-0.0379862	0.0235947
-0.039646	0.0833643	0.0859856	0.104803		0.00527333	0.0789246	-0.017727	0.0683009
0.00713395	0.0998646	0.118327	0.182633		0.0219308	0.132313	0.0291836	0.0735654
0.0831066	0.103257	0.02866	0.169244		0.100857	0.11209	0.114543	0.0427381
0.0236982	0.0393671	-0.0237469	0.202453		0.0786731	0.0713588	0.164017	0.0568277
0.0100534	-0.011797	-0.0482396	0.18525		0.0191066	0.0840035	0.154316	0.0475361
0.00399752	0.0454553	-0.0417479	0.246576		0.0119097	0.0126533	0.0882963	0.0667141
-0.0248869	0.0683685	-0.0363182	0.295307		0.0359182	0.0145375	0.0425323	0.092621
-0.0353125	0.1042	-0.076058	0.301149		0.0547464	0.00683438	0.0332956	0.0900635
-0.0419829	0.131028	-0.0827099	0.214951		0.0557435	-0.0373576	0.0164865	0.0565344
-0.113207	0.197579	-0.0280041	0.148899		0.0104059	-0.0345791	0.00699287	0.0751843
-0.0695872	0.206931	0.135488	0.0963622		-0.0473679	-0.0679713	0.0733389	0.105137
-0.0553321	0.249431	0.14828	0.0626633		-0.013128	-0.0647693	0.0636511	0.142818
-0.00345322	0.0871471	0.118188	0.0304865		0.0232102	-0.0148196	0.110532	0.119896
0.0315637	0.0667208	0.0260962	0.0297552		0.0538729	-0.0759805	0.131252	0.100006
0.0205894	-0.0773807	0.0257957	0.0529669		0.045021	-0.047443	0.0942862	0.0636471
-0.0323121	-0.0198771	0.0333285	0.0157514		0.0521867	0.0660074	0.109665	0.100816
0.0222183	0.0106405	0.0758981	0.0283628		0.0782028	0.075559	0.134894	0.0892178
0.011561	-0.0156147	-0.0239673	-0.0235802		0.0999341	0.160957	0.122112	0.0647991
0.0771528	-0.0612207	0.00756843	-0.121712		0.0706438	0.221661	0.0915784	0.0377616
0.0867425	-0.0616888	-0.0179811	-0.140194		0.101773	0.161726	-0.0087976	0.00858245
0.0216187	-0.0823084	0.0131435	-0.0852325		-0.0262442	0.217477	-0.0873391	0.0295851
-0.0328756	0.0440358	0.0336744	-0.0439608		-0.0527082	0.264315	-0.024196	0.06193
-0.062247	0.0756014	-0.00410205	-0.0473856		0.0415955	0.265028	-0.021105	0.0379993
-0.0745458	0.0446546	-0.0749714	-0.00339567		0.140935	0.174823	0.0332199	0.014538
-0.0104447	0.0349965	-0.0542498	-0.0771161		0.192002	0.128623	0.030722	0.0136098
-0.030526	0.0182563	-0.116279	-0.125191		0.224454	0.128779	-0.00869568	-0.0199566
-0.0100789	-0.0407906	-0.0932433	-0.0604192		0.126532	0.11953	-0.0370904	0.00156316
-0.00860966	-0.0214552	-0.0918561	-0.0904843		0.055133	0.122195	-0.0215335	0.0270937
-0.00176276	-0.0389882	-0.100216	-0.146445		0.017725	0.113886	0.016589	0.0627695
0.00605584	-0.0540381	-0.0604813	-0.0588966		0.00164615	-0.0148943	0.0689595	0.0839318
0.068811	-0.0680436	0.0380365	0.0091827		-0.0295209	-0.0875863	0.141158	0.0744376
-0.0284294	-0.0332522	0.0117506	-0.0494968		-0.0750144	-0.0623359	0.169009	0.053982

## Sheet: Rise times + latencies
Rise times				Latencies
Proximal ROIs	Distal ROIs			Proximal ROIs	Distal ROIs
0.077972	0.091331			0.0379481	0.0295319
0.0976513	0.0854969			0.02124	0.0268161
0.0797067	0.0754898			0.0364189	0.0337797
0.0920897	0.0816543			0.0304555	0.0279121
0.0724387	0.0688948			0.0300414	0.0388742
0.0657897	0.0887065			0.0403714	0.0295129
0.0785282	0.0816273			0.0421872	0.027787
0.0266263	0.0825959			0.0853519	0.0275757
0.0722268	0.0823633			0.0551111	0.0268505
0.0404416	0.0734012			0.0587496	0.0289664
0.100579	0.0898707			0.0356054	0.0326583
0.0867142	0.0851532			0.0452902	0.0262093
0.0712793	0.0773895			0.0772881	0.0300696
0.0979903	0.0817537			0.0317958	0.0274639
0.112673	0.072176			0.014741	0.0277755
0.0846932	0.0899093			0.0575506	0.0320084
0.0935996	0.0820215			0.0553196	0.029496
0.11365	0.0780063			0.0205125	0.0292484
0.102242	0.0833962			0.0283749	0.0260307
0.104014	0.096312			0.0244522	0.0238023
0.0788684	0.0892837			0.0524805	0.0262554
0.113314	0.0861807			0.0306464	0.025224
0.0711835	0.0802271			0.0581155	0.0246735
0.109965	0.0743576			0.0332839	0.0246775
0.114547	0.0919936			0.024009	0.0257837
0.0818816	0.08288			0.0858397	0.0317166
0.0482307	0.0823033			0.0478437	0.0306287
0.0730061	0.0808654			0.0387598	0.0318655
0.0694595	0.0792806			0.0375531	0.0250066
0.0680916	0.0873082			0.0314491	0.028625
0.0610872	0.0914034			0.0409222	0.0249537
0.0771758	0.0855777			0.0313203	0.0282267
0.0414038	0.0852634			0.0312078	0.0280998
0.0696234	0.0818436			0.0221194	0.0279124
0.0796713	0.0922168			0.0370882	0.0344503
0.0773809	0.0808615			0.026447	0.0263227
0.0794299	0.086921			0.0307321	0.0279898
0.0709021	0.0692404			0.0259917	0.0396478
0.0925035	0.0719993			0.0196192	0.0220406
0.0805821	0.0753174			0.02614	0.026068
0.073637	0.0802729			0.0302	0.0366041
0.0748708	0.0848997			0.0373911	0.0426467
0.0746548	0.073709			0.0318492	0.0388917
0.0678048	0.071481			0.0317805	0.0353601
0.0793593	0.0614831			0.0294535	0.0321426
0.0714491	0.0807467			0.0378406	0.0357291
0.0773804	0.0552154			0.0190204	0.0876954
0.0869148	0.0623026			0.0207261	0.0629442
0.0855305	0.0784908			0.0243607	0.04112
0.0722456	0.0691648			0.0247125	0.0297067
0.068475	0.0871947			0.0389028	0.0292904
0.0535255	0.0844572			0.0667754	0.0284941
0.0468626	0.0789406			0.0476814	0.0247994
0.055098	0.0770688			0.0613293	0.0373428
0.0671294	0.0887279			0.0495179	0.0277346
0.0898573	0.0734754			0.0297864	0.0504725
0.0878074	0.0654328			0.0284705	0.0594082
0.0700958	0.0750835			0.0280953	0.0285993
0.076442	0.0711882			0.0303871	0.0402539
0.0848649	0.0690205			0.0235004	0.0458591
0.0841942	0.0649943			0.0288668	0.0306201
0.063359	0.0781341			0.0331852	0.0169752
0.0904226	0.0824349			0.0377959	0.0333805
0.0393274	0.0768802			0.0976538	0.0396145
0.0875183	0.0859888			0.0269822	0.0291057
0.075433	0.0807522			0.0261948	0.0224714
0.142629	0.0672176			0.020107	0.0269931
0.116621	0.0876557			0.0272541	0.0267825
0.116298	0.0674009			0.0109301	0.0393584
0.100461	0.0680094			0.0417764	0.0482973
0.108948	0.0587766			0.0329323	0.066961
0.10335	0.0766535			0.025116	0.0251087
0.109613	0.085917			0.0384152	0.0291653
0.126071	0.0778725			0.0215797	0.0387154
0.113694	0.0786738			0.0153313	0.0266748
0.127994	0.0759836			0.0406771	0.0336413
0.123767	0.0792479			0.0202034	0.0195964
0.12051	0.0817993			0.0221706	0.0315416
0.103396	0.0888719			0.0377555	0.0243509
0.103561	0.0851164			0.0314755	0.0300588
0.129543	0.0801642			0.028461	0.0274513
0.107178	0.0833989			0.0314955	0.0264189
0.116031	0.0763383			0.0235916	0.02896
0.105186	0.088571			0.0312719	0.030869
0.129562	0.081402			0.026365	0.0264812
0.104555	0.073091			0.0408075	0.0260377
0.114525	0.0748542			0.0212739	0.0280237
0.110437	0.084636			0.0255108	0.0268186
0.118373	0.0739491			0.0297298	0.0414717
0.108162	0.0781593			0.0298068	0.0244203
0.11533	0.0781848			0.0273135	0.0256017
0.106513	0.0866084			0.0205341	0.0293205
0.124632	0.0821815			0.0255265	0.0287886
0.107535	0.0731905			0.0470391	0.037704
0.104956	0.0797022			0.0277342	0.0280688
0.129812	0.0730601			0.028478	0.0371723
0.111779	0.0767935			0.039166	0.0291934
0.118169	0.0753753			0.0363319	0.0234642
0.115353	0.0721681			0.0280654	0.0338628
0.0358877	0.0659196			0.0757976	0.0495036
0.0315097	0.0765283			0.0800046	0.0270455
0.0331358	0.077431			0.0825654	0.0267963
0.0617025	0.0736453			0.0764074	0.0270028
0.0527184	0.085521			0.0845366	0.0277922
0.0636103	0.0832193			0.0675032	0.0315945
0.0894456	0.0828099			0.0645638	0.0262072
0.0582635	0.0847616			0.0784326	0.0250175
0.0358145	0.0714979			0.0830393	0.0423024
0.0565255	0.0795799			0.0728833	0.0277023
0.0573237	0.0714733			0.0596261	0.0320208
0.073828	0.0830031			0.0301545	0.0282733
0.0767052	0.076133			0.0239306	0.0284298
0.0737607	0.0788104			0.027683	0.0263431
0.0570914	0.0804208			0.0251987	0.0302638
0.0534896	0.0752578			0.0281933	0.0283542
0.0624855	0.0820312			0.0453192	0.0253632
0.0719712	0.0706115			0.0238962	0.0306039
0.0665927	0.088789			0.0321364	0.0255992
0.0674047	0.0821154			0.029043	0.0253157
0.0680704	0.0792985			0.0289514	0.0231347
0.0720675	0.0825789			0.0267634	0.028799
0.0722566	0.0806958			0.0249815	0.0233195
0.0669379	0.078155			0.0287683	0.0264287
0.0660798	0.0726583			0.0363179	0.0234928
0.0752678	0.0816465			0.0269442	0.0320189
0.0668569	0.085089			0.0269744	0.0266843
0.0681989	0.0816124			0.0267709	0.027462
0.0707989	0.0785241			0.0294592	0.031091
0.0778107	0.0777378			0.0280057	0.0303233
0.0679078	0.0713196			0.02602	0.0349476
0.0669062	0.0805258			0.0268612	0.0274564
0.0630967	0.0777183			0.0381422	0.0377276
0.0671504	0.0792349			0.0274604	0.0317144
0.075433	0.0833611			0.0255632	0.0256239
0.0647393	0.0778985			0.0280332	0.0268016
0.0687685	0.0759289			0.0447261	0.0313592
0.0747814	0.0756819			0.0315785	0.0224879
0.0757983	0.0648431			0.0248289	0.0230883
0.0796094	0.081919			0.0267506	0.0335507
0.0663066	0.0868292			0.0654261	0.0228772
0.0590586	0.0806654			0.0344952	0.0323133
0.0798759	0.0793994			0.0404582	0.0262458
0.0826042	0.0766914			0.0257475	0.024847
0.0434911	0.075727			0.0588679	0.0260606
0.0545049	0.0751454			0.0140743	0.0249729
0.0657077	0.074507			0.0425167	0.0352978
0.0260236	0.0901366			0.0518291	0.0265131
0.0669293	0.083424			0.0389672	0.0183576
0.0822294	0.077008			0.0303027	0.0319345
0.036462	0.0730114			0.0389845	0.0292325
0.0721095	0.0735335			0.0591111	0.024293
0.076246	0.0690023			0.0239241	0.038002
0.0720517	0.0830266			0.0273078	0.0228526
0.0715635	0.0761454			0.0298083	0.0243785
0.0555439	0.0810378			0.0413487	0.0284393
0.0585642	0.0804854			0.0612581	0.0259908
0.0738671	0.0724208			0.0445511	0.0301753
0.0754485	0.0846918			0.0289304	0.0200463
0.0638518	0.0766656			0.0401235	0.0487697
0.0588773	0.0809477			0.0496418	0.0260775
0.061193	0.0810284			0.0646166	0.028334
0.0687361	0.080482			0.0382498	0.0274301
0.0560784	0.0768299			0.0467043	0.0282843
0.0517466	0.0812736			0.0550168	0.0288066
0.0383608	0.0862415			0.082057	0.0351687
0.0478985	0.082453			0.0639916	0.0314436
0.0722289	0.0790917			0.0756214	0.0284197
0.0381077	0.0723827			0.0163372	0.0336251
0.0618804	0.0740261			0.0374951	0.0245181
0.0790689	0.073751			0.0656362	0.024792
0.0746744	0.0795636			0.0254707	0.0277638
0.0694809	0.0851558			0.0316684	0.0242131
0.0808317	0.0895162			0.0300756	0.0272748
0.069185	0.0725875			0.0414305	0.0401668
0.0818112	0.0812707			0.0236849	0.0205097
0.0772726	0.0783463			0.0289843	0.0242683
0.0701794	0.0715094			0.0333102	0.0297644
0.0797739	0.08323			0.0213001	0.0200937
0.0676157	0.0859652			0.0343766	0.0301294
0.0765316	0.0802383			0.0326309	0.0383366
0.0834906	0.0840936			0.0322476	0.0332961
0.0884535	0.0814951			0.0229783	0.0341694
0.0801716	0.0790977			0.0310276	0.025719
0.0792687	0.0797355			0.0272739	0.0239342
0.0781544	0.0828185			0.0251292	0.0326788
0.0792852	0.0858745			0.0257912	0.0303528
0.0755162	0.0859186			0.0265343	0.0295284
0.0802815	0.0812483			0.0264485	0.0308735
0.06215	0.0802831			0.0488446	0.0247515
0.0638625	0.0778747			0.0452488	0.0371864
0.0884588	0.082654			0.0240379	0.0236986
0.0906596	0.0816631			0.0272167	0.0378056
0.0797763	0.084091			0.0228801	0.0293221
0.0640907	0.0859253			0.0393825	0.0304046
0.0738211	0.0827497			0.0488968	0.0317802
0.061534	0.0771437			0.0509384	0.0261729
0.0657467	0.0722909			0.0443373	0.0293159
0.065861	0.0829243			0.0368815	0.0316153
0.0713254	0.0885124			0.0409843	0.0284331
0.065376	0.0788174			0.0359323	0.0275635
	0.0718658				0.0321653
	0.0753464				0.0300553
	0.0837572				0.0314207
	0.0854209				0.0258868
	0.078263				0.0287238
	0.0756944				0.0224268
	0.0758669				0.0292285
	0.0826015				0.0237396
	0.0815623				0.0280631
	0.0802273				0.0379527
	0.0818763				0.0278735
	0.0760038				0.0280774
	0.0817695				0.0318067
	0.0889399				0.0269801
	0.0863013				0.0281963
	0.0825317				0.0239482
	0.0773656				0.029414
	0.0893474				0.0272157
	0.0864883				0.0286417
	0.0730436				0.0353315
	0.0782073				0.029103
	0.0745571				0.0250525
	0.0890131				0.0283131
	0.0818787				0.0323457
	0.0832918				0.0333433
	0.0816171				0.0357966
	0.0767178				0.027812
	0.0835213				0.0307415
	0.0848725				0.0277259
	0.0877719				0.0229566
	0.0814924				0.0253773
	0.0717519				0.030184
	0.0844984				0.0290654
	0.0831404				0.0259878
	0.0762303				0.03075
	0.07779				0.024019
	0.0675056				0.0313673
	0.0908966				0.0279188
	0.0838174				0.0305808
	0.0778868				0.0285395
	0.0786374				0.0282846
	0.0766668				0.0329638
	0.0890023				0.0303002
	0.0826176				0.036077
	0.0817329				0.0292319
	0.0759985				0.0293862
	0.0772505				0.030436
	0.0842504				0.0411947
	0.0880237				0.0309412
	0.0815756				0.033355
	0.0814507				0.0271172
	0.0744412				0.0313854
	0.0899143				0.0277886
	0.0869937				0.0285571
	0.0856862				0.0285502
	0.0786219				0.0253544
	0.0741403				0.0264168
	0.0901663				0.028975
	0.0877729				0.0270371
	0.0838962				0.0262456
	0.0781216				0.0257046
	0.0745787				0.0262952
	0.088207				0.0303066
	0.0832851				0.0303018
	0.080986				0.024276
	0.0808489				0.0243402
	0.073854				0.0288973
	0.0884545				0.0272989
	0.0840068				0.0250068
	0.0820267				0.0300296
	0.0805444				0.0271747
	0.0767136				0.0269806
	0.0885857				0.029118
	0.0907502				0.0278869
	0.0829628				0.0268948
	0.07759				0.0323274
	0.0744608				0.0335674
	0.0885353				0.0289721
	0.0863593				0.0301046
	0.0839913				0.0281009
	0.0789194				0.0279193
	0.0801945				0.0286291
	0.109128				0.0373273
	0.105164				0.0463512
	0.101429				0.0471649
	0.100813				0.037948
	0.105491				0.0326331
	0.110825				0.0358824
	0.113887				0.0282366
	0.104397				0.0328248
	0.0997434				0.0295296
	0.11039				0.0297445
	0.113201				0.0332276
	0.117299				0.0300081
	0.106345				0.0283032
	0.11184				0.0245638
	0.109278				0.0291536
	0.117978				0.0274243
	0.111334				0.0379706
	0.101929				0.0373907
	0.108247				0.0320746
	0.108549				0.0258861
	0.117201				0.0285735
	0.10738				0.0256231
	0.10801				0.0261293
	0.111532				0.0282697
	0.120755				0.0313542
	0.116554				0.027755
	0.100812				0.0429892
	0.118765				0.0287152
	0.11462				0.0324797
	0.12132				0.0278373
	0.11963				0.0264261
	0.119269				0.0273116
	0.115478				0.0255108
	0.108448				0.0516746
	0.123499				0.0300193
	0.117086				0.0364342
	0.119991				0.0295315
	0.113823				0.0326595
	0.104122				0.0439482
	0.120924				0.0334904
	0.118307				0.0325239
	0.122494				0.0296974
	0.117678				0.033794
	0.107212				0.0376458
	0.0731521				0.0697558
	0.0790346				0.0689301
	0.0706708				0.0712817
	0.0756906				0.070305
	0.0774293				0.0686381
	0.0724263				0.0791753
	0.0827985				0.0685293
	0.0838501				0.0665336
	0.0664019				0.0751849
	0.057451				0.0674565
	0.0922363				0.0724382
	0.0775499				0.0742066
	0.0771921				0.0644744
	0.0764758				0.069135
	0.0716922				0.0636686
	0.0795832				0.0746331
	0.0870936				0.0722916
	0.0827155				0.0718844
	0.0796716				0.07245
	0.0696743				0.0675776
	0.084507				0.064662
	0.0980463				0.0654109
	0.0797853				0.0709033
	0.081335				0.0695665
	0.0723231				0.0682678
	0.0911599				0.0725071
	0.0893223				0.0765611
	0.0772534				0.0715203
	0.0773787				0.0685564
	0.0694323				0.068289
	0.0814397				0.0291422
	0.0770259				0.0297675
	0.0772617				0.0324361
	0.0845569				0.0289938
	0.0830011				0.03035
	0.084822				0.0304415
	0.0799582				0.0275528
	0.0784683				0.0307928
	0.0776193				0.0323741
	0.0830915				0.0303883
	0.0838222				0.0286078
	0.0780742				0.0300784
	0.0813114				0.0288735
	0.0785373				0.0290902
	0.0807588				0.0320022
	0.0857758				0.0288315
	0.0832262				0.025588
	0.0744002				0.0267732
	0.0804503				0.0275318
	0.0772269				0.0279059
	0.0778196				0.0257941
	0.0829253				0.0306573
	0.0833501				0.0255492
	0.0761712				0.0270779
	0.0758067				0.0270607
	0.0726921				0.0315473
	0.0721755				0.0339722
	0.0764174				0.034488
	0.0836887				0.0262993
	0.08042				0.0250607
	0.0785019				0.0231824
	0.0736244				0.0291616
	0.0745897				0.0278013
	0.0863292				0.0245214
	0.0810936				0.0261952
	0.0824025				0.0250652
	0.0764907				0.0265174
	0.0721695				0.0315141
	0.0767768				0.0332191
	0.0834911				0.0263889
	0.0872788				0.027091
	0.07904				0.0308943
	0.0776496				0.0332325
	0.0754256				0.0248666
	0.075566				0.0278973
	0.087136				0.0268407
	0.0816212				0.0312903
	0.0802171				0.0266168
	0.0740668				0.0257373
	0.0767143				0.0332255
	0.0786168				0.0281787
	0.0879702				0.0298752
	0.0844016				0.0274735
	0.0828838				0.0317114
	0.0871408				0.0245059
	0.073833				0.0289154
	0.0791531				0.0291996
	0.0884785				0.0254639
	0.0781789				0.0344515
	0.0815394				0.0312504
	0.0809884				0.038435
	0.0707402				0.0251138
	0.0863981				0.0275669
	0.0889604				0.0299149
	0.0832307				0.0422199
	0.066571				0.0506757
	0.0885761				0.018631
	0.0826332				0.0375133
	0.079927				0.0384486
	0.0789618				0.0368295
	0.0775256				0.0390888
	0.0650289				0.04299
	0.0888173				0.0382972
	0.0826311				0.0410204
	0.0728982				0.038187
	0.0721307				0.0404063
	0.0612287				0.0428536
	0.0643992				0.0375314
	0.0898423				0.0351698
	0.0716934				0.0408562
	0.0724337				0.0397797
	0.0720079				0.0371416
	0.0652266				0.04126
	0.0870707				0.0364967
	0.0807467				0.0413878
	0.073046				0.0421579
	0.066518				0.0402439
	0.0630033				0.0372319
	0.0636165				0.0351057
	0.0844335				0.0395453
	0.0703333				0.043087
	0.0714574				0.0437424
	0.0676952				0.0382609
	0.0669563				0.0359397
	0.0590103				0.0432047
	0.0821438				0.0377493
	0.0739975				0.0402806
	0.074079				0.0399562
	0.0700388				0.0350452
	0.0658033				0.0389566
	0.0616436				0.0369835
	0.0761187				0.0421896
	0.083617				0.033528
	0.0667708				0.037128
	0.0667515				0.0391287
	0.0696926				0.0346141
	0.0621722				0.0335543
	0.0811603				0.033632
	0.0803468				0.0371059
	0.0744636				0.0335841
	0.0700259				0.0336542
	0.0706935				0.0361156
	0.0635016				0.0371062
	0.0855495				0.0264719
	0.0775285				0.0341942
	0.0732425				0.0382561
	0.0673628				0.0313695
	0.0688255				0.0369465
	0.068461				0.0370516
	0.0860417				0.0329812
	0.0690847				0.0379684
	0.072026				0.0393397
	0.0793156				0.0289004
	0.0799408				0.0336077
	0.07232				0.0313935
	0.0723784				0.0375232
	0.0756655				0.0296154
	0.0689287				0.0334461
	0.0690525				0.0320437
	0.0837245				0.0418041
	0.0732484				0.0341148
	0.0721097				0.0374982
	0.0697927				0.0360394
	0.0712941				0.0311429
	0.0650129				0.034481
	0.0807898				0.0344787
	0.073802				0.0399611
	0.0770509				0.0358779
	0.0759826				0.0359564
	0.0668178				0.0315642
	0.0784621				0.0407889
	0.0798259				0.0375836
	0.0728993				0.0307768
	0.0707705				0.0369126
	0.056876				0.0477459
	0.0698898				0.0362432
	0.0696447				0.0470292
	0.0716322				0.0332959
	0.0710187				0.0337131
	0.0620658				0.0399373
	0.074404				0.0367176
	0.0735316				0.0376229
	0.0654776				0.0397287
	0.0665531				0.0406511
	0.0692484				0.0351424
	0.0656002				0.0409042
	0.0885215				0.0304865
	0.0873995				0.0325226
	0.0901236				0.0283048
	0.0857935				0.0270486
	0.0856261				0.0314372
	0.0901928				0.0279436
	0.0891426				0.0288088
	0.0866385				0.0274076
	0.0818417				0.0305255
	0.0794015				0.033685
	0.0890265				0.0267663
	0.0884528				0.029283
	0.0875118				0.0293484
	0.0816305				0.0304427
	0.0775663				0.0322816
	0.0880757				0.0300355
	0.0874238				0.0272596
	0.083061				0.0307858
	0.0808856				0.029783
	0.0808897				0.0258901
	0.0879016				0.0303712
	0.0878141				0.0276027
	0.0858614				0.0295179
	0.0842414				0.0297294
	0.0817988				0.0300486
	0.0879373				0.0286617
	0.0882506				0.0306888
	0.0918386				0.0278986
	0.0828026				0.0286362
	0.0866824				0.0288634
	0.0946293				0.0286302
	0.0926461				0.0287469
	0.091126				0.0288753
	0.0790248				0.0282839
	0.0816963				0.0248434
	0.0961353				0.0285361
	0.0947091				0.0281361
	0.0911441				0.0281801
	0.0838904				0.0291029
	0.0772005				0.029041
	0.0928607				0.0284559
	0.0896907				0.0258991
	0.087401				0.0282871
	0.0872779				0.0286736
	0.0896187				0.0265069
	0.0938063				0.0276944
	0.0932002				0.0278761
	0.0904696				0.0270024
	0.0911912				0.0283626
	0.0897548				0.0291968
