# Supplementary material for: Spatiotemporal properties of glutamate input support direction selectivity in the dendrites of retinal starburst amacrine cells
Source: eLife. 2022 Nov 8;11:e81533. doi: 10.7554/eLife.81533 (PMC9674338; doi:10.7554/eLife.81533)
Supplement: Figure 3—figure supplement 1—source data 1. [file elife-81533-fig3-figsupp1-data1.xlsx]

## Sheet: STATS
Signal-to-noise Statistics
Proximal ROIs			Distal ROIs
STis	Peak		STis	Peak
0.226315	0.914962		0.158753	1.94162
0.236191	1.21759		0.112886	2.04155
0.250933	0.986611		0.132559	1.99775
0.255018	0.642876		0.14292	1.74903
0.459699	0.845318		0.199441	1.92923
0.15647	0.975233		0.178144	1.57703
0.376652	1.09269		0.170007	1.77896
0.249918	1.50418		0.158576	1.67395
0.312914	1.18445		0.144937	1.77229
0.205271	0.993531		0.241905	1.88537
0.294485	1.16753		0.175886	1.63753
0.148504	1.24267		0.202072	1.72036
0.234442	1.45833		0.175104	1.86457
0.11291	1.09103		0.190679	1.64259
0.23918	1.8386		0.247737	1.73142
0.212433	1.48131		0.187521	1.6846
0.270881	2.08191		0.204486	1.82315
0.298976	1.48351		0.244258	1.83664
0.158401	1.6083		0.184856	1.87003
0.254153	2.27822		0.242624	1.56993
0.242575	2.03172		0.159054	1.88457
0.303566	1.5842		0.129131	1.9919
0.157797	1.85388		0.128455	2.0355
0.244864	1.47439		0.145139	1.94502
0.25406	1.47669		0.195006	2.43441
0.226371	1.79845		0.182847	1.83359
0.21655	1.62793		0.2125	1.82747
0.15896	1.50022		0.199967	2.1899
0.13802	1.29559		0.262421	2.0439
0.246459	1.53594		0.208172	1.98734
0.201005	1.34475		0.246867	1.98881
0.214861	1.79228		0.179832	2.48821
0.275583	0.828381		0.341455	1.75572
0.199295	1.43882		0.252922	2.19582
0.265393	1.17396		0.241706	2.22837
0.302559	0.961512		0.197967	2.67867
0.266419	1.20782		0.261888	2.27859
0.252378	1.29348		0.246233	2.11183
0.314976	1.29187		0.271727	2.47912
0.327405	1.56449		0.186333	2.44799
0.445929	1.09836		0.135788	2.75205
0.3075	1.7667		0.308218	1.69416
0.256884	1.15533		0.143186	2.86977
0.421339	1.33985		0.155307	2.29439
0.33368	1.28132		0.199339	3.09747
0.330326	1.32368		0.16337	1.95907
0.378409	1.69949		0.150771	2.48824
0.299467	1.87517		0.160543	2.63184
0.277676	1.37798		0.153512	1.93316
0.286637	1.56198		0.172551	2.50501
0.333865	1.17631		0.106553	2.82758
0.222604	1.53321		0.105369	1.71316
0.281206	2.12855		0.0709836	2.3445
0.34925	1.83208		0.136781	2.0567
0.377759	1.81064		0.142407	2.7836
0.361915	1.93204		0.216523	1.66609
0.217561	1.16796		0.166595	2.41231
0.305582	1.47874		0.100311	2.0707
0.234402	1.07454		0.157525	2.23985
0.346893	1.3909		0.103057	2.445
0.28724	2.13195		0.157426	1.94635
0.356262	1.65159		0.217157	1.68249
0.338893	2.09888		0.164599	1.99864
0.379525	1.7043		0.155168	2.58276
0.355102	2.49254		0.169332	2.15029
0.269007	2.00267		0.0971777	2.29066
0.231621	1.97517		0.153977	2.34963
0.299692	1.53111		0.138388	2.13642
0.227222	1.84204		0.139683	2.29273
0.187475	2.58735		0.240405	1.86383
0.227984	2.20752		0.263612	1.59566
0.263562	1.15206		0.207353	1.85068
0.327764	1.43848		0.130574	1.85764
0.280888	0.87788		0.213472	2.43861
0.235016	1.24316		0.198382	1.73227
0.317164	1.7377		0.159547	2.29307
0.342673	1.84504		0.158327	1.70921
0.43796	1.74146		0.22591	1.57739
0.321685	1.4383		0.159025	2.40075
0.299046	1.07334		0.190759	2.57165
0.359853	1.50973		0.183777	2.25023
0.371104	2.12745		0.166363	1.66657
0.312689	1.96611		0.211623	1.17879
0.399946	1.94338		0.168228	2.54992
0.30182	1.58533		0.186815	2.2064
0.228532	1.59415		0.207478	2.00815
0.398522	1.59269		0.216597	2.31493
0.382263	1.64901		0.18541	2.07599
0.344226	1.57493		0.172333	3.3972
0.309633	2.47619		0.210084	2.5515
0.302699	1.5455		0.12287	2.23929
0.340161	2.01376		0.213504	2.85449
0.364361	1.5906		0.21522	2.80214
0.283091	1.81484		0.220117	2.90972
0.266623	1.18429		0.260465	2.46943
0.282439	1.78856		0.169423	2.30947
0.273832	1.47579		0.303754	2.66864
0.209027	1.99828		0.259535	2.6858
0.21295	2.25655		0.287587	2.22871
0.163839	1.94555		0.279344	2.69691
0.18788	2.27439		0.298203	3.11274
0.216519	2.19058		0.318508	2.86456
0.293038	1.59636		0.25729	2.47394
0.370035	1.90906		0.353533	2.24794
0.333379	2.25109		0.208516	2.55893
0.308136	2.53792		0.233197	2.60287
0.326508	1.92996		0.283466	2.57708
0.223094	2.34993		0.185211	2.32061
0.256839	2.11623		0.224464	2.22402
0.298841	1.58962		0.183096	2.07568
0.214599	2.44582		0.211178	2.78534
0.274065	2.40804		0.192393	2.24787
0.399858	1.74702		0.166291	2.28815
0.300442	2.22502		0.328369	2.23574
0.284954	2.25571		0.20423	2.43314
0.310953	1.37842		0.198071	2.63422
0.244149	1.85474		0.153961	2.57864
0.365315	2.04335		0.208624	2.69631
0.256251	1.68599		0.181034	2.02866
0.312752	1.95094		0.196102	2.2573
0.36367	2.06625		0.205447	2.14483
0.375054	2.07981		0.167791	2.31406
0.238447	2.37037		0.182123	1.93402
0.451876	1.56054		0.177088	2.5115
0.289848	1.91759		0.239198	2.50386
0.423023	1.71943		0.238667	1.87424
0.336296	2.48751		0.183649	2.42113
0.412373	1.52081		0.187076	2.09938
0.386345	1.77595		0.248416	1.8475
0.337362	1.60353		0.199805	2.2578
0.433603	1.26855		0.276751	2.03987
0.28992	1.76359		0.22928	2.72703
0.276435	1.17348		0.203159	2.77435
0.315842	1.59825		0.206789	2.11375
0.393038	1.96369		0.187875	2.50432
0.334056	1.17872		0.143115	2.4378
0.27157	1.7761		0.168728	2.43193
0.253683	1.56266		0.172904	2.50708
0.28681	1.45216		0.295108	2.75199
0.25478	1.26699		0.1529	2.44333
0.365534	1.31991		0.207494	2.17096
0.326974	1.76517		0.193308	2.05805
0.336105	1.66394		0.168944	2.18406
0.336365	1.68647		0.125413	2.38033
0.283012	2.39558		0.167847	2.45808
0.413154	1.08635		0.20127	2.14094
0.430697	0.972378		0.158563	2.11711
0.347552	1.33664		0.141948	2.29071
0.352028	1.32916		0.141239	1.99695
0.404588	1.75289		0.115123	2.44458
0.343141	1.63257		0.168122	2.38716
0.295851	1.44563		0.191721	2.37495
0.424738	0.952443		0.21534	2.25223
0.386091	1.55691		0.159394	1.98718
0.431191	1.62703		0.120776	1.78277
0.40351	2.01636		0.215513	2.34959
0.507224	1.98133		0.237914	2.0448
0.317268	1.69516		0.146506	2.14033
0.512782	1.56116		0.234194	1.61255
0.344177	1.95251		0.161488	2.16318
0.434995	1.40736		0.164522	2.30593
0.331366	1.31512		0.15557	2.80518
0.390659	1.2996		0.227906	2.23317
0.391025	0.714971		0.261121	2.37718
0.208007	1.08325		0.175656	2.22802
0.344412	0.892828		0.193904	1.63779
0.42635	0.910124		0.244791	2.53754
0.30925	0.91761		0.211064	2.07822
0.302067	1.33178		0.272355	2.64266
0.360338	1.20634		0.203967	2.54746
0.268662	1.10673		0.234074	2.65622
0.295343	0.830341		0.234985	2.1001
0.353964	1.2929		0.2411	1.83821
0.286447	1.74746		0.152752	2.93617
0.307123	2.20515		0.194916	2.77698
0.25206	1.16972		0.268002	2.3237
0.314975	1.07018		0.183234	2.35733
0.359531	1.44436		0.178489	2.26768
0.362686	2.03495		0.128356	2.08722
0.210213	1.56375		0.0963406	1.80366
0.277614	1.00262		0.20063	2.8826
0.516621	1.80646		0.164042	2.67154
0.475279	1.76713		0.183763	2.25867
0.317047	1.09166		0.163456	2.85502
0.438596	1.12326		0.154633	2.53097
0.419769	2.04891		0.160689	2.36443
0.355457	1.32121		0.174116	1.80191
0.393652	1.50043		0.245263	2.54687
0.359473	1.39416		0.190545	3.14195
0.275229	1.48661		0.188561	2.81736
0.305529	1.52657		0.246284	2.22111
0.340175	1.63202		0.184886	2.38088
0.358532	1.95984		0.172618	2.23662
0.26728	1.97972		0.146763	2.24499
0.481311	1.64377		0.257052	2.76816
0.318373	1.88991		0.177511	2.6063
0.431934	1.25094		0.180905	2.64731
0.407327	1.0743		0.209871	2.67843
0.491778	1.01213		0.239696	2.67118
0.339478	1.84525		0.251709	2.42578
0.288608	1.44316		0.223302	2.65882
0.389904	1.03444		0.204166	2.57218
0.421004	1.36827		0.20599	2.5322
0.30274	1.01011		0.18899	2.36807
0.354671	1.35616		0.196398	2.47035
0.331657	1.40834		0.190206	2.42305
0.436363	1.26188		0.133059	2.19854
0.450807	1.40783		0.218606	2.43862
0.444248	1.16435		0.210239	2.71912
0.296457	1.48451		0.249863	2.32441
0.32431	1.75521		0.149774	1.78882
0.32979	2.03123		0.131493	2.05547
0.299727	2.07951		0.149564	2.34827
0.320951	1.09393		0.239352	2.60765
0.424769	1.19802		0.187742	1.99699
0.388385	1.317		0.171979	1.80312
0.310966	1.51089		0.091554	2.44001
0.258247	1.57957		0.171263	2.56032
0.316597	1.89195		0.238407	2.37621
0.329057	2.11607		0.189566	1.98203
0.397055	2.53445		0.194919	1.78973
0.323375	2.01389		0.136573	1.87343
0.416615	2.03492		0.169713	2.10831
0.411609	2.62737		0.169853	2.64945
0.254327	2.10793		0.144832	2.2984
0.318638	2.52213		0.11835	2.27153
0.291308	2.4639		0.0933365	1.89648
0.324467	2.42832		0.101139	2.25079
0.315085	2.63604		0.129606	2.34363
0.422996	2.66796		0.167991	2.12927
0.269766	2.76681		0.157935	2.62287
0.33443	2.76412		0.200271	2.35352
0.305004	2.96441		0.164008	2.38769
0.318235	1.77189		0.185281	2.20494
0.353717	2.40532		0.244493	2.11125
0.312573	2.24204		0.142077	2.27937
0.219066	2.49116		0.199389	2.04436
0.224629	2.01829		0.215647	2.25009
0.329463	2.10252		0.167433	2.48879
0.389484	1.9241		0.264748	2.51468
0.428294	1.5145		0.203661	2.71201
0.322898	1.89018		0.241919	2.58765
0.321076	1.37572		0.248522	2.74483
0.318097	1.2331		0.161106	2.91358
0.179302	1.06166		0.289327	2.26862
0.310273	1.49551		0.233273	2.60525
0.362688	1.46551		0.243149	3.04687
0.318592	1.52495		0.194	2.8384
0.300559	1.33834		0.197298	2.69416
0.353801	1.73507		0.208274	2.15774
0.364545	1.55444		0.202529	2.57266
0.384504	1.08513		0.169062	2.63498
0.253975	0.99888		0.144236	2.27071
0.258321	1.56108		0.286608	2.57751
0.277712	1.60628		0.167094	2.6829
0.471939	1.34235		0.18417	2.54469
0.530438	0.95686		0.145904	2.46506
0.23797	1.34668		0.127123	2.18803
0.285772	0.992869		0.171282	2.34789
0.325273	1.72539		0.251246	2.34308
0.406963	1.68275		0.194991	2.20658
0.400629	1.61106		0.162499	2.3634
0.38613	1.50418		0.0948865	2.14268
0.330336	1.50654		0.148902	1.84744
0.412911	1.31367		0.239655	2.61525
0.382919	1.41629		0.154677	2.1565
0.316552	2.25156		0.134667	2.18056
0.281111	1.64894		0.0968793	2.17302
0.357973	1.19956		0.181337	2.35087
0.376901	1.35443		0.239709	2.72899
0.403253	1.88485		0.250471	2.25257
0.335468	1.3163		0.229987	2.52662
0.328606	1.5545		0.243075	2.76514
0.273012	1.24187		0.205631	2.47693
0.35702	1.19014		0.243719	2.36793
0.357777	1.27548		0.280161	2.66306
0.37722	1.05979		0.186248	2.39951
0.295874	1.41263		0.275068	2.59152
0.314859	1.72366		0.258792	2.23318
0.423563	1.81417		0.317519	2.3963
0.397547	1.55283		0.219838	2.18794
0.341677	1.18431		0.222621	2.16793
0.478419	1.743		0.236605	2.44606
0.507782	1.52894		0.293436	2.70316
0.460307	2.4711		0.109887	1.21109
0.428068	1.66928		0.157283	1.24565
0.329229	1.59403		0.162079	1.23528
0.402178	1.43348		0.203695	1.27277
0.457398	1.72645		0.086451	1.20277
0.348941	1.45013		0.106595	1.18965
0.378414	1.42322		0.0899643	1.24561
0.337171	2.04406		0.212891	1.27668
0.304429	1.39968		0.131447	1.0059
0.331904	1.64832		0.101186	1.29111
0.309148	1.96005		0.156894	1.3816
0.295857	1.51972		0.1263	1.43085
0.29875	1.5602		0.12625	1.08683
0.316033	1.59483		0.122307	1.44221
0.353975	1.51901		0.0942603	1.48287
0.369787	1.7219		0.100333	1.34581
0.365225	1.81284		0.153963	1.37052
0.334976	1.76477		0.133374	1.47629
0.339663	1.53256		0.168695	1.52522
0.385712	1.53528		0.140548	1.99353
0.347794	1.59734		0.113422	1.1164
0.476858	1.61353		0.11179	1.27487
0.403886	1.57822		0.12852	1.22988
0.356769	1.60326		0.124619	2.02569
0.438295	1.31955		0.0888036	1.26408
0.370202	1.3077		0.0301601	1.6391
0.373152	1.44986		0.170024	0.698037
0.406736	1.46788		0.14023	1.3124
0.250356	1.60439		0.0880572	1.57492
			0.0445193	1.35784
			0.0752408	1.21655
			0.0319536	1.1529
			0.140971	1.47654
			0.155427	1.06894
			0.0360925	1.49897
			0.0732521	1.38955
			0.114025	1.55839
			0.117827	1.3341
			0.124921	1.0047
			0.106103	0.913985
			0.0903618	0.998729
			0.114538	1.56229
			0.114964	1.41575
			0.0765637	1.17974
			0.181782	2.34414
			0.179264	1.67142
			0.246866	1.33758
			0.289995	1.67298
			0.175178	1.70768
			0.210472	1.92862
			0.167757	1.6996
			0.182932	0.952751
			0.152497	1.14263
			0.247262	1.19745
			0.234229	1.62188
			0.227162	1.20292
			0.186731	1.71279
			0.164235	1.66252
			0.204031	1.49053
			0.208771	1.64038
			0.212042	1.69836
			0.213531	1.56648
			0.173668	1.60804
			0.137896	1.44311
			0.191064	1.8248
			0.188976	1.46233
			0.114417	1.5115
			0.208281	1.90183
			0.212873	1.23733
			0.145375	1.87128
			0.0773611	1.99893
			0.151868	1.73175
			0.149187	1.8943
			0.194296	1.65789
			0.257977	2.39251
			0.255099	2.20179
			0.241228	2.32685
			0.242123	2.70837
			0.23592	2.97308
			0.255772	2.73176
			0.258357	2.62322
			0.23986	2.27271
			0.252141	2.5894
			0.288019	2.45528
			0.2398	2.56868
			0.24993	2.65612
			0.171281	2.57987
			0.185536	2.21565
			0.247227	2.10058
			0.163276	2.00539
			0.210129	2.43439
			0.188511	2.36939
			0.169145	2.50877
			0.251671	2.96094
			0.270715	2.63867
			0.167364	2.29655
			0.202161	2.09604
			0.191341	2.2044
			0.243755	2.33635
			0.24783	2.37648
			0.227302	1.95655
			0.220346	1.91295
			0.176133	2.19599
			0.20704	1.97223
			0.161789	2.63255
			0.213522	2.36131
			0.185034	2.24581
			0.185922	2.3039
			0.182253	2.15961
			0.194404	2.08053
			0.193081	2.0657
			0.204323	2.63654
			0.205365	2.17888
			0.211351	2.22575
			0.161988	2.1058
			0.149571	2.73795
			0.217253	2.45576
			0.155601	2.37876
			0.160017	2.69085
			0.172	2.33374
			0.239728	2.84954
			0.191314	2.75212
			0.249676	2.05529
			0.228691	2.36646
			0.220861	2.50415
			0.256353	2.49049
			0.229165	2.79219
			0.185379	2.39459
			0.18081	2.58751
			0.213024	2.63604
			0.197781	1.79593
			0.275836	2.50038
			0.216136	1.87183
			0.224964	2.73583
			0.233673	1.70938
			0.177867	1.81846
			0.289906	2.77196
			0.23733	2.81706
			0.274821	2.2389
			0.253722	1.78229
			0.219227	1.79271
			0.433596	2.11009
			0.320796	2.83754
			0.372177	2.46738
			0.406279	2.08811
			0.328223	3.18012
			0.374694	2.42153
			0.328283	2.57383
			0.266956	2.82971
			0.400018	2.91954
			0.412373	2.95982
			0.358576	3.27782
			0.345112	3.14831
			0.29487	2.38844
			0.2323	2.81894
			0.448947	2.89453
			0.345115	2.52963
			0.318873	2.42178
			0.319857	2.55011
			0.27334	2.37932
			0.350036	3.45624
			0.370875	3.21689
			0.430421	2.93331
			0.428102	2.40965
			0.354993	2.15216
			0.30051	3.0165
			0.380241	2.8407
			0.315874	3.17898
			0.365863	3.38905
			0.25664	2.84316
			0.377932	2.87495
			0.287577	3.12015
			0.259029	2.88915
			0.306724	3.1383
			0.32881	2.70938
			0.267174	2.59558
			0.272399	2.28977
			0.323725	2.43936
			0.302543	3.06076
			0.256949	2.25573
			0.309803	3.14673
			0.247218	2.298
			0.209587	1.85697
			0.2389	2.33299
			0.336395	2.83467
			0.326185	2.81589
			0.268482	2.74979
			0.271752	1.68812
			0.212345	2.26224
			0.261995	2.45346
			0.297158	2.69474
			0.249822	2.38745
			0.241144	2.70749
			0.17351	2.04085
			0.199979	1.84367
			0.247217	2.45037
			0.168743	2.25198
			0.135517	2.47514
			0.190567	2.2646
			0.272965	2.15537
			0.307862	2.53963
			0.172528	2.10671
			0.110798	1.96542
			0.108324	2.54959
			0.159137	2.37334
			0.304623	2.39381
			0.217331	2.70625
			0.196399	2.15536
			0.151964	2.45429
			0.157076	2.10174
			0.198941	2.64992
			0.155297	2.3723
			0.203149	2.04705
			0.228833	2.78429
			0.271112	2.85757
			0.194227	2.31306
			0.188284	2.94272
			0.264806	2.32778
			0.27658	2.76762
			0.260458	2.50162
			0.187184	2.48389
			0.207167	3.07068
			0.229978	2.89738
			0.283892	2.61141
			0.31945	3.10071
			0.273985	3.13772
			0.288136	2.83335
			0.309296	2.82679
			0.244942	3.04778
			0.290375	2.76785
			0.211333	2.47148
			0.201483	2.45678
			0.185634	2.33839
			0.138962	2.03734
			0.314992	2.54084
			0.296857	2.76416
			0.360665	2.43069
			0.237266	2.33445
			0.188398	1.86203
			0.272742	2.30534
			0.282023	2.53588
			0.259003	2.23704
			0.235613	1.96456
			0.249392	1.96471
			0.271848	2.8175
			0.267169	2.14702
			0.296074	1.93518
			0.235823	1.96549
			0.228546	2.15854
			0.260517	2.55556
			0.258805	1.95087
			0.172209	1.86276
			0.242138	1.89522
			0.242728	2.15741
			0.338611	2.39859
			0.3203	2.27729
			0.190305	2.01601
			0.299244	2.35249
			0.259802	2.11212
			0.189201	2.78991
			0.210147	2.37861
			0.277567	2.38683
			0.229172	2.19038
			0.149859	2.22189
			0.26636	2.38694
			0.255699	2.14018
			0.259323	2.32665
			0.274002	2.57861
			0.261002	2.1122
			0.289899	2.64736
			0.244734	2.26404
			0.304025	2.39189
			0.283738	2.29322
			0.22566	2.01008
			0.216941	2.32149
			0.271488	2.56997
			0.28608	2.23873
			0.239307	2.12315
			0.197623	1.76807
			0.362735	0.994662
			0.129087	1.16354
			0.156715	1.36786
			0.141997	1.19386
			0.124251	1.52222
			0.139779	1.34881
			0.0902573	1.13945
			0.22077	1.1021
			0.20009	2.53036
			0.192539	2.42429
			0.224546	2.30763
			0.17076	1.67146
			0.1609	1.30802
			0.154202	1.34977
			0.0815614	1.25805
			0.11341	1.38299
			0.212122	2.54304
			0.206445	2.04235
			0.257497	2.06606
			0.205989	1.65595
			0.16326	1.73644
			0.161483	1.29195
			0.0982601	1.38269
			0.0673097	1.154
			0.228748	2.28699
			0.19811	1.83805
			0.245322	1.79896
			0.155791	1.54783
			0.11092	1.34557
			0.114819	1.17292
			0.157172	1.24711
			0.106415	1.3835
			0.235089	1.98573
			0.176791	1.87408
			0.117687	1.78849
			0.117716	1.38099
			0.131885	1.60031
			0.164956	1.52686
			0.22383	1.33953
			0.180036	1.24176
			0.181068	2.02445
			0.216899	1.84346
			0.219306	2.02547
			0.162116	1.40476
			0.180742	1.52717
			0.196349	1.59605
			0.137806	1.76597
			0.202756	1.50594
			0.227398	2.05649
			0.210919	1.98155
			0.209748	1.5674
			0.195093	1.56474
			0.195851	1.84151
			0.196973	1.82203
			0.216232	1.5911
			0.170141	1.51041
			0.163489	1.72739
			0.205434	1.61792
			0.206562	1.5238
			0.176709	1.93056
			0.253204	1.62973
			0.180535	1.57348
			0.197907	1.49486
			0.131764	1.66562
			0.171056	1.95883
			0.180606	1.24126
			0.219435	0.995241
			0.186929	1.13589
			0.253885	1.22526
			0.160604	1.44685
			0.153143	1.5876
			0.21133	1.59718
			0.102588	1.4664
			0.175968	1.22018
			0.127245	0.939546
			0.0744348	1.05119
			0.0960849	0.937656
			0.104866	1.23577
			0.138371	1.28264
			0.0950531	1.16327
			0.0627707	1.11993
			0.0858306	0.929447
			0.0441801	0.882565
			0.0895863	0.787064
			0.0507295	1.29801
			0.0205675	0.908695
			0.0334446	0.759895
			0.0617919	0.955557
			0.179425	1.79484
			0.0679404	0.84407
			0.0552185	0.86056
			0.0981141	0.722011
			0.220657	1.6108
			0.0989348	1.1373
			0.00741249	0.681877
			0.110239	1.01261
			0.0723429	1.48078
			0.06356	1.32388
			0.0489303	1.80191
			0.0650034	1.95446
			0.265557	1.48466
			0.0478061	0.766983
			0.0549725	0.891779
			0.095331	1.04196
			0.133989	1.22686
			0.0681892	1.52012
			0.125394	1.47779
			0.109437	1.4302
			0.0892179	1.23917
			0.117038	1.32126
			0.160778	1.82113
			0.22345	1.64413
			0.168746	1.40084
			0.162655	1.28232
			0.147314	1.40135
			0.194626	1.47803
			0.278114	1.67151
			0.302605	1.78954
			0.276328	1.44594
			0.188967	1.65529
			0.2024	1.39099
			0.144724	0.906979
			0.134115	1.25092
			0.230336	1.36826
			0.208479	1.42647
			0.240236	1.36605
			0.222455	1.38052
			0.071223	0.736685
			0.122049	1.4127
			0.161961	0.939903
			0.313541	1.38967
			0.154112	1.50291
			0.219614	1.0888
			0.165631	1.42982
			0.331207	1.47598
			0.123513	0.531435
			0.166378	0.945109
			0.252203	1.13903
			0.223543	1.44473
			0.194094	0.970396
			0.183092	1.12481
			0.137626	1.21724
			0.164741	0.657435
			0.213735	1.32956
			0.246388	1.28359
			0.165273	0.897564
			0.260594	1.00519
			0.0764432	1.17019
			0.100319	0.613792
			0.107718	0.795171
			0.254115	1.33933
			0.191029	1.39935
			0.18939	1.17639
			0.199413	0.793695
			0.18108	0.820742
			0.169961	1.58277
			0.156846	1.19571
			0.225791	1.599
			0.0484382	0.799496
			0.0661796	0.932514
			0.171591	0.845732
			0.142826	1.08958
			0.167033	1.18873
			0.199709	0.624459
			0.139082	0.679802
			0.0908528	1.39423
			0.0828834	0.574793
			0.238175	1.39021
			0.271715	1.23644
			0.260054	1.11184
			0.286859	1.24171
			0.179923	1.58608
			0.163207	1.29778
			0.117736	0.857896
			0.271466	1.36313
			0.29832	1.14116
			0.257316	1.61191
			0.216213	1.21296
			0.183219	1.21087
			0.283835	0.812476
			0.0865932	1.54191
			0.164943	1.27732
			0.205427	1.15437
			0.328727	1.02044
			0.200151	1.12308
			0.32635	1.25472
			0.234303	1.68109
			0.0827714	1.24037
			0.221878	1.07745
			0.236969	1.52986
			0.237506	1.81383
			0.245619	1.23707
			0.27363	1.40294
			0.171886	1.37056
			0.319989	1.09365
			0.25179	1.32992
			0.166753	1.32124
			0	0.735458
			0.236148	1.44831
			0.149838	1.41566
			0.1552	1.64132
			0.202961	1.15213
			0.151198	1.78835
			0.145654	1.53963
			0.124077	1.49599
			0.217157	1.69456
			0.109457	1.66719
			0.145861	1.80264
			0.232158	1.21703
			0.264622	1.48186
			0.219892	1.26244
			0.147468	2.21015
			0.121212	1.90749
			0.127304	1.43418
			0.193756	1.40917
			0.142389	1.57329
			0.181369	1.56845
			0.153022	1.8538
			0.168294	1.56353
			0.15582	1.62179
			0.176012	1.42266
			0.130239	1.51417
			0.152133	1.7745
			0.169386	1.28405
			0.230069	1.78474
			0.220742	1.37093
			0.223413	1.47027
			0.225937	1.09928
			0.198112	1.72217
			0.20244	1.38315
			0.212349	1.18218
			0.287306	1.32397
			0.199378	1.00993
			0.22795	1.79527
			0.208013	1.42109
			0.173737	1.44523
			0.136757	1.66539
			0.168516	1.39965
			0.224203	1.7759
			0.146442	1.26477
			0.163963	1.76486
			0.224823	1.27063
			0.147496	1.34782
			0.193176	1.49514
			0.149965	1.41513
			0.234535	1.11308
			0.0664412	1.43635
			0.254442	1.67753
			0.183865	1.34544
			0.172943	1.82658
			0.19792	1.94003
			0.097535	1.17241
			0.10058	1.43251
			0.295554	2.61235
			0.26505	2.08822
			0.333843	1.3057
			0.211437	1.7147
			0.229399	2.93963
			0.271929	2.40566
			0.290198	2.20925
			0.307122	1.72364
			0.245035	1.92185
			0.306994	2.311
			0.332472	3.15545
			0.109098	2.65076
			0.100992	2.61661
			0.24836	2.52398
			0.265324	2.11056
			0.210175	1.96241
			0.374854	2.5334
			0.410956	2.07618
			0.417378	2.62967
			0.136021	1.85789
			0.166701	2.1807
			0.179319	2.37193
			0.178763	2.75757
			0.177477	1.89981
			0.298521	2.55688
			0.107759	1.99205
			0.151134	1.87975
			0.228939	2.46357
			0.151486	2.09392
			0.197924	2.18585
			0.158689	2.0305
			0.298446	1.95967
			0.273987	2.44445
			0.167085	2.12071
			0.229385	2.32983
			0.211246	2.65205
			0.196727	2.55253
			0.148442	2.08438
			0.127708	2.17572
			0.223667	2.2254
			0.209768	2.35493
			0.185288	2.7708
			0.186537	2.47019
			0.26846	2.89074
			0.250458	2.51397
			0.144204	1.85503
			0.184494	2.08828
			0.17959	2.33462
			0.186569	2.394
			0.189186	2.08428
			0.166544	2.39118
			0.208329	2.38026
			0.200456	2.11938
			0.153559	1.89993
			0.148088	1.81359
			0.0933846	2.21065
			0.173811	2.25818
			0.145294	2.24158
			0.14279	2.24686
			0.141778	1.93372
			0.1191	1.34141
			0.129366	1.58318
			0.199023	1.78946
			0.21456	2.00668
			0.163923	2.73616
			0.187959	2.45241
			0.123672	1.95744
			0.0970181	1.57333
			0.14255	1.62683
			0.107912	1.3228
			0.256804	1.26281
			0.161423	1.48967
			0.214879	2.47188
			0.139979	2.07931
			0.192857	1.87454
			0.18209	1.88635
			0.15998	2.16661
			0.203912	1.89567
			0.208207	1.76433
			0.108584	1.55521
			0.120622	1.95124
			0.135755	2.76581
			0.194432	2.13426
			0.178909	1.94326
			0.141669	2.39854
			0.13813	2.43839
			0.164541	2.52708
			0.177392	2.27519
			0.139138	2.11955
			0.122968	2.40738
			0.179943	2.28806
			0.0925761	2.02607
			0.120464	2.11924
			0.170813	2.39314
			0.177859	2.3047
			0.168318	2.20038
			0.120169	2.30995
			0.142912	1.87588
			0.200276	2.55267
			0.199272	2.14543
			0.336326	2.41859
			0.253497	2.41576
			0.280931	2.40504
			0.219301	3.14391
			0.141251	2.93857
			0.044086	2.95337
			0.0446468	2.85634
			0.0374356	2.69942
			0.0898301	2.05068
			0.174162	3.3413
			0.155392	2.96767
			0.190249	2.53816
			0.140781	2.54054
			0.00431649	2.03466
			0.0500667	2.01926
			0.0870948	2.86333
			0.177431	1.94492
			0.169164	3.5317
			0.144691	2.72635
			0.190664	2.31239
			0.141447	1.77052
			0.0998294	1.9912
			0.190156	2.10935
			0.159777	2.00004
			0.239601	2.71819
			0.146224	2.91384
			0.151286	2.14641
			0.164173	1.91405
			0.150902	2.24525
			0.15396	1.95311
			0.20958	2.09829
			0.199181	2.07802
			0.222227	1.55176
			0.199659	2.04299
			0.250685	1.13704
			0.193566	2.16177
			0.132825	2.09046
			0.179203	2.41238
			0.168365	2.68374
			0.301079	1.72285
			0.16079	1.60827
			0.198882	2.29581
			0.182629	2.14284
			0.152576	2.18774
			0.190881	2.33144
			0.171966	1.75948
			0.119896	2.20631
			0.0896591	1.67518
			0.183894	1.78339
			0.214293	1.64904
			0.181104	2.09292
			0.153522	1.70025
			0.205244	2.0386
			0.125859	2.11914
			0.1731	1.65044
			0.135809	2.00389
			0.25741	1.33898
			0.116046	2.14077
			0.152881	2.00677
			0.183739	1.77153
			0.128431	1.90592
			0.123949	1.5931
			0.0720106	2.02158
			0.206375	1.9393
			0.131562	2.32559
			0.0800815	2.64932
			0.0769311	2.09178
			0.122588	1.81618
			0.169893	1.55004
			0.137531	1.00984
			0.0396407	1.5546
			0.112914	1.79971
			0.095444	2.40325
			0.0952887	1.80098
			0.20083	1.77733
			0.0917374	1.75893
			0.11285	1.83386
			0.0992149	1.21955
