# Supplementary material for: Spatiotemporal properties of glutamate input support direction selectivity in the dendrites of retinal starburst amacrine cells
Source: eLife. 2022 Nov 8;11:e81533. doi: 10.7554/eLife.81533 (PMC9674338; doi:10.7554/eLife.81533)
Supplement: Figure 4—source data 1. [file elife-81533-fig4-data1.xlsx]

## Sheet: Control
Sustained-transient index (STi)
100 μm			200 μm			400 μm			800 μm
Proximal ROIs	Distal ROIs		Proximal ROIs	Distal ROIs		Proximal ROIs	Distal ROIs		Proximal ROIs	Distal ROIs
0.15748	0.0396739		0.226315	0.362735		0.107844	0.215548		0.100199	0.235955
0.184609	0.0559566		0.236191	0.129087		0.298086	0.0829351		0.330199	0.145414
0.104755	0.093422		0.250933	0.156715		0.215953	0.0996402		0.300424	0.0804442
0.134506	0.123776		0.255018	0.141997		0	0.135543		0.0433991	0.137521
0.00424719	0.0845774		0.459699	0.124251		0.487738	0.00951935		0.286163	0.0748956
0.217067	0.0880347		0.15647	0.139779		0.141175	0		0.179463	0.055192
0.207257	0.0960772		0.376652	0.0902573		0.107659	0.0677012		0.00572124	0.193243
0.132098	0.148425		0.249918	0.22077		0.295013	0.16224		0.198134	0.0798752
0.226364	0.0144792		0.312914	0.20009		0.172684	0.166691		0.21913	0.1143
0.203749	0.116233		0.205271	0.192539		0.196281	0.0881824		0.153903	0.0412632
0.196978	0.105389		0.294485	0.224546		0.0920037	0.145731		0.113714	0.0719428
0.276873	0.113833		0.148504	0.17076		0.199225	0.043408		0.117476	0.0126109
0.0994236	0.081095		0.234442	0.1609		0.172326	0.0249199		0.162031	0.0326046
0.0911261	0.0875949		0.11291	0.154202		0.18563	0.00825941		0.261406	0.0224075
0.0284797	0.0300009		0.23918	0.0815614		0.385371	0		0.329995	0.151008
0.0575244	0.106868		0.212433	0.11341		0.312422	0.00604795		0.262437	0
0.0529875	0.0535715		0.270881	0.212122		0.302492	0.191904		0.246368	0.194453
0.0893469	0.0865705		0.298976	0.206445		0.289116	0.189086		0.198715	0.0958103
0.0124123	0.118645		0.158401	0.257497		0.182559	0.192617		0.239203	0.0682092
0.039154	0.115831		0.254153	0.205989		0.306114	0.129471		0.210994	0.0394037
0.0820411	0.105297		0.242575	0.16326		0.194376	0.0474612		0.223898	0.049038
0.103176	0.119449		0.303566	0.161483		0.227879	0.0213691		0.214184	0.0283463
0.0480204	0.0753605		0.157797	0.0982601		0.106386	0		0.118184	0.0668954
0.154658	0.0344263		0.244864	0.0673097		0.202606	0		0.260177	0.0150803
0.139572	0.0668267		0.25406	0.228748		0.305861	0.22268		0.245029	0.184335
0.15898	0.092888		0.226371	0.19811		0.241095	0.152193		0.204979	0.1103
0.136259	0.100457		0.21655	0.245322		0.147538	0.18422		0.085514	0.0782714
0.149725	0.102812		0.15896	0.155791		0.113394	0.0538934		0.219203	0.0452219
0.0654548	0.0699622		0.13802	0.11092		0.241095	0.0294625		0.142994	0.0776373
0.144871	0.0780103		0.246459	0.114819		0.176345	0.0308567		0.120156	0.0229756
0.124263	0.0655703		0.201005	0.157172		0.207868	0.000722576		0.346292	0.109839
0.046856	0.117332		0.214861	0.106415		0.288834	0		0.265043	0
0.205289	0.134752		0.275583	0.235089		0.35798	0.188869		0.382141	0.243108
0.111467	0.0928077		0.199295	0.176791		0.388442	0.10918		0.275557	0.122729
0.0357457	0.120029		0.265393	0.117687		0.319186	0.091562		0.346466	0.109295
0.0851997	0.0850577		0.302559	0.117716		0.26288	0.0860099		0.350982	0.0692034
0.271979	0.130606		0.266419	0.131885		0.133861	0.0670352		0.221284	0.0559419
0.282718	0.103977		0.252378	0.164956		0.0959605	0.0844544		0.216282	0.0256247
0.215666	0.143349		0.314976	0.22383		0.218871	0.157354		0.211873	0.132243
0.123846	0.133049		0.327405	0.180036		0.130679	0.129591		0.16279	0.0682386
0.234568	0.104906		0.445929	0.181068		0.261563	0.212761		0.321481	0.238028
0.160536	0.148733		0.3075	0.216899		0.126656	0.165891		0.261486	0.157267
0.226973	0.198031		0.256884	0.219306		0.259248	0.198773		0.353665	0.0835659
0.224973	0.124839		0.421339	0.162116		0.334066	0.128309		0.271532	0.0305949
0.365092	0.148678		0.33368	0.180742		0.235819	0.0997491		0.273885	0.0366402
0.0858752	0.149042		0.330326	0.196349		0.3202	0.0907521		0.429263	0.037076
0.239461	0.124932		0.378409	0.137806		0.359338	0.092034		0.251873	0
0.236621	0.147253		0.299467	0.202756		0.257024	0.0347579		0.348148	0.0662252
0.199038	0.154807		0.277676	0.227398		0.423317	0.239625		0.222471	0.224577
0.266123	0.098732		0.286637	0.210919		0.402668	0.189942		0.19934	0.137013
0.347355	0.150863		0.333865	0.209748		0.307225	0.123567		0.184864	0.0890852
0.296672	0.111223		0.222604	0.195093		0.366958	0.098028		0.26661	0.0374994
0.213089	0.142202		0.281206	0.195851		0.256465	0.0652834		0.146975	0.0123034
0.284392	0.142272		0.34925	0.196973		0.405392	0.0547733		0.169961	0.00433142
0.24233	0.150587		0.377759	0.216232		0.333867	0.054536		0.222104	0.00909925
0.286416	0.0615989		0.361915	0.170141		0.388476	0.0310999		0.146402	0.0185098
0.201219	0.115584		0.217561	0.163489		0.357551	0.177584		0.124812	0.148545
0.324943	0.122112		0.305582	0.205434		0.197164	0.234228		0.288502	0.167863
0.188231	0.139763		0.234402	0.206562		0.424544	0.158027		0.211801	0.0735186
0.187529	0.161617		0.346893	0.176709		0.208166	0.113077		0.308871	0.0281843
0.23866	0.196955		0.28724	0.253204		0.160337	0.0984744		0.172515	0.0218205
0.233026	0.146057		0.356262	0.180535		0.311105	0.0572742		0.268835	0.00314018
0.228194	0.0997575		0.338893	0.197907		0.136021	0.0453462		0.204967	0.0181482
0.278303	0.117317		0.379525	0.131764		0.176009	0.0235945		0.0500872	0
0.340203	0.107764		0.355102	0.171056		0.0894232	0.15744		0.164517	0.205929
0.300794	0.180857		0.269007	0.180606		0.0889423	0.238066		0.227655	0.194687
0.0996994	0.0956043		0.231621	0.219435		0.126284	0.121735		0.245823	0.0259002
0.251248	0.159852		0.299692	0.186929		0.133678	0.138214		0.165259	0.0129849
0.147281	0.151799		0.227222	0.253885		0.189694	0.12659		0.261542	0.0263897
0.177914	0.0983365		0.187475	0.160604		0.0652433	0.0587163		0.129831	0.0234445
0.252458	0.120262		0.227984	0.153143		0.220182	0.0370191		0.0786131	0
	0.154103			0.21133			0.146863			0.0387228
	0.12289			0.102588			0.13823			0.130936
	0.128741			0.175968			0.183165			0.105803
	0.0349137			0.127245			0.0795648			0.0519849
	0.022769			0.0744348			0.0599773			0.00636044
	0.0288664			0.0960849			0.0812464			0
	0.0141397			0.104866			0.0231301			0
	0.0849101			0.138371			0.0792415			0.0500524
	0.0362783			0.0950531			0.116064			0.0133326
	0.00247642			0.0627707			0.0769636			0.050993
	0			0.0858306			0.0397279			0.0499297
	0			0.0441801			0.0322425			0
	0			0.0895863			0			0
	0.00672188			0.0507295			0.0625892			0.0888846
	0.0038177			0.0205675			0.089335			0.03399
	0			0.0334446			0.00225005			0
	0			0.0617919			0			0
	0.0299348			0.179425			0.239504			0.210739
	0			0.0679404			0.0182956			0
	0.00667895			0.0552185			0.0220917			0
	0			0.0981141			0.056082			0.0688888
	0.172078			0.220657			0.258422			0.177185
	0.039798			0.0989348			0.184809			0.233368
	0.0283683			0.00741249			0.175812			0.240807
	0			0.110239			0.183692			0.247388
	0			0.0723429			0.176015			0.228765
	0.00410687			0.06356			0.125023			0.137743
	0.00721328			0.0489303			0.0545948			0.0826225
	0.000907889			0.0650034			0.079882			0.0735757
	0.225897			0.265557			0.26727			0.214338
	0			0.0478061			0.149485			0.147828
	0.0342878			0.0549725			0.114906			0.101485
	0			0.095331			0.175013			0.154974
	0.0165753			0.133989			0.198636			0.194789
	0.025517			0.0681892			0.0767294			0.100425
	0.0265443			0.125394			0.100745			0.101722
	0.0471758			0.109437			0.143321			0.135417
	0			0.0892179			0.0847629			0.166616
	0.00697894			0.117038			0.0905412			0.101584
	0.058723			0.160778			0.181331			0.164692
	0.090707			0.22345			0.208988			0.18769
	0.0592229			0.168746			0.159954			0.168415
	0.0669326			0.162655			0.171211			0.165005
	0.0619895			0.147314			0.174635			0.194569
	0			0.194626			0.0827015			0.115348
	0			0.278114			0.146566			0.184597
	0.0468754			0.302605			0.217921			0.153587
	0.103969			0.276328			0.255494			0.238612
	0.143796			0.188967			0.143249			0.125254
	0.0869128			0.2024			0.164895			0.0679706
	0.0180825			0.144724			0.13727			0.0332774
	0.0178251			0.134115			0.0649742			0.110576
	0.0320268			0.230336			0.134421			0.0884043
	0.0805102			0.208479			0.153147			0.100597
	0.161891			0.240236			0.166192			0.0768421
	0.139703			0.222455			0.128773			0.142932
	0.0360502			0.071223			0.134139			0.0617239
	0.0358378			0.122049			0.148429			0.0975684
	0.0641001			0.161961			0.181158			0.076403
	0.211755			0.313541			0.196696			0.107841
	0.136974			0.154112			0.152115			0.0759268
	0.178973			0.219614			0.186884			0.127255
	0.144512			0.165631			0.0781602			0.16729
	0.21153			0.331207			0.230224			0.232319
	0.0136112			0.123513			0.144094			0.0359598
	0.088337			0.166378			0.0504198			0.116758
	0.217189			0.252203			0.102941			0.0637016
	0.216822			0.223543			0.129719			0.0557056
	0.175173			0.194094			0.167001			0.202045
	0.20546			0.183092			0.0673072			0.0712233
	0.0984577			0.137626			0.115236			0.26633
	0.109662			0.164741			0.0571165			0.0932199
	0.120046			0.213735			0.133597			0.0698955
	0.211427			0.246388			0.0773128			0.179954
	0.129101			0.165273			0.0829192			0.204525
	0.261587			0.260594			0.0928156			0.0889057
	0.028912			0.0764432			0.0221132			0.0791362
	0.0604133			0.100319			0			0.124665
	0.121811			0.107718			0.0837799			0.101343
	0.270875			0.254115			0.122706			0.130505
	0.166069			0.191029			0.073123			0.107147
	0.211171			0.18939			0.0708894			0.12779
	0.21546			0.199413			0.140846			0.138159
	0.142421			0.18108			0.115129			0.136003
	0.198009			0.169961			0.0715268			0.134053
	0.102642			0.156846			0.0340632			0.163975
	0.20374			0.225791			0.0259464			0.159631
	0.0481966			0.0484382			0.0134521			0.0740903
	0.127682			0.0661796			0.0459911			0.217365
	0.0806193			0.171591			0.0686977			0.211761
	0.210632			0.142826			0.0265504			0.0957877
	0.187532			0.167033			0.046327			0.175777
	0.176684			0.199709			0.0324551			0.190174
	0.125457			0.139082			0.0905044			0.152836
	0.100523			0.0908528			0.0851038			0.212737
	0.0593316			0.0828834			0.0758575			0.0762174
	0.173935			0.238175			0.145982			0.133651
	0.216726			0.271715			0.133662			0.19115
	0.165271			0.260054			0.197052			0.192414
	0.279153			0.286859			0.116553			0.236375
	0.177082			0.179923			0.110142			0.180189
	0.104862			0.163207			0.150529			0.25991
	0.138008			0.117736			0.134993			0.193553
	0.154853			0.271466			0.19673			0.222851
	0.296561			0.29832			0.246114			0.284748
	0.266728			0.257316			0.177431			0.21521
	0.261683			0.216213			0.142999			0.270395
	0.159699			0.183219			0.299077			0.341542
	0.190464			0.283835			0.178871			0.25677
	0.163558			0.0865932			0.224692			0.340956
	0.132078			0.164943			0.13905			0.161959
	0.167667			0.205427			0.0487525			0.263539
	0.118385			0.328727			0.17788			0.13511
	0.198447			0.200151			0.0456629			0.137423
	0.247412			0.32635			0			0.073437
	0.167985			0.234303			0.0659427			0.144238
	0.17008			0.0827714			0.121525			0.0430101
	0.180475			0.221878			0.105638			0.0879117
	0.23396			0.236969			0.0924095			0.166948
	0.147483			0.237506			0.116568			0.16179
	0.137323			0.245619			0.0487645			0.14234
	0.173358			0.27363			0.167121			0.297337
	0.14904			0.171886			0.133154			0.231387
	0.261169			0.319989			0.090914			0.143269
	0.162928			0.25179			0.0217521			0.147784
	0.138492			0.166753			0.0947547			0.191417
	0.164679			0			0.184964			0.209351
	0.215649			0.236148			0.210928			0.125897
	0.148333			0.149838			0.0797627			0.0896645
	0.174417			0.1552			0.0663592			0.0942863
	0.225265			0.202961			0.119606			0.0923016
	0.218043			0.151198			0.0312657			0.0863336
	0.25142			0.145654			0.275602			0.00621367
	0.167224			0.124077			0.0583252			0.104237
	0.145368			0.217157			0.000393961			0.138774
	0.171429			0.109457			0.0421474			0.0837855
	0.185478			0.145861			0.271059			0.20744
	0.220591			0.232158			0.144331			0.0988107
	0.163118			0.264622			0.0770641			0.0828424
	0.186845			0.219892			0.0412928			0.188441
	0.227027			0.147468			0.0861305			0.105607
	0.181008			0.121212			0.0347495			0.0569635
	0.102317			0.127304			0.107414			0.098428
	0.196008			0.193756			0.0574202			0.220037
	0.20674			0.142389			0.155722			0.144662
	0.227774			0.181369			0.0692659			0.14273
	0.197755			0.153022			0.0788586			0.0584932
	0.143702			0.168294			0.0152347			0.0770349
	0.213047			0.15582			0.205556			0.11754
	0.165674			0.176012			0.0198254			0.0658075
	0.207226			0.130239			0			0.0520819
	0.212402			0.152133			0.0995219			0.0592548
	0.154986			0.169386			0.0735005			0.251227
	0.169903			0.230069			0.0406319			0.0199151
	0.142107			0.220742			0.101935			0.120518
	0.228585			0.223413			0.00873488			0.117612
	0.185318			0.225937			0			0.155555
	0.192316			0.198112			0.0516366			0.0271936
	0.153436			0.20244			0.178851			0.23011
	0.0813759			0.212349			0.16722			0.218884
	0.245449			0.287306			0.0361395			0.0566651
	0.131033			0.199378			0.0944776			0.105995
	0.159969			0.22795			0.0400261			0.0548719
	0.174875			0.208013			0.0165221			0.124406
	0.175907			0.173737			0			0.038572
	0.206288			0.136757			0.0281696			0
	0.150284			0.168516			0.0598625			0.0468936
	0.0647985			0.224203			0.322766			0.112172
	0.0364839			0.146442			0.0531232			0.213538
	0.131091			0.163963			0.189758			0.203358
	0.155705			0.224823			0.00909046			0.228344
	0.0579718			0.147496			0.128772			0.177672
	0.128916			0.193176			0			0.028956
	0.105234			0.149965			0.0527674			0.127698
	0.207291			0.234535			0.0214742			0.286978
	0.0585568			0.0664412			0.083589			0.0074943
	0.0350519			0.254442			0.17136			0.144128
	0.11372			0.183865			0.0903187			0
	0.0718051			0.172943			0.175004			0.128423
	0.148957			0.19792			0			0.225832
	0.0708421			0.097535			0.105731			0.0224362
	0.102736			0.10058			0.0708712			0.0313458
	0.128781			0.295554			0.30777			0.168769
	0.0637672			0.26505			0.247881			0.157686
	0.058437			0.333843			0.17152			0.12968
	0.0201115			0.211437			0.274737			0.229347
	0.0289524			0.229399			0.287812			0.247079
	0.0853841			0.271929			0.286029			0.247607
	0.195009			0.290198			0.382675			0.177278
	0.122785			0.307122			0.389673			0.254472
	0.0526891			0.245035			0.290009			0.143304
	0.0591324			0.306994			0.292848			0.26148
	0.190017			0.332472			0.320103			0.19976
	0.0813588			0.109098			0.273513			0.156247
	0.1216			0.100992			0.160139			0.169678
	0.151334			0.24836			0.336546			0.0977507
	0.195281			0.265324			0.282458			0.145122
	0.174008			0.210175			0.309706			0.0990607
	0.21907			0.374854			0.505949			0.211593
	0.157518			0.410956			0.265662			0.140532
	0.270898			0.417378			0.341377			0.193574
	0.0978364			0.136021			0.173523			0.307178
	0.148648			0.166701			0.218336			0.234653
	0.130325			0.179319			0.227083			0.116084
	0.147021			0.178763			0.322701			0.172798
	0.183673			0.177477			0.221731			0.170098
	0.200851			0.298521			0.255379			0.14228
	0.116939			0.107759			0.160012			0.131917
	0.179677			0.151134			0.180092			0.098246
	0.286777			0.228939			0.205416			0.0629762
	0.148108			0.151486			0.182698			0.0644158
	0.22133			0.197924			0.130443			0.0406449
	0.177341			0.158689			0.177324			0.0241564
	0.194251			0.298446			0.178853			0.00515417
	0.232862			0.273987			0.237362			0.0316389
	0.182682			0.167085			0.168939			0.080248
	0.173455			0.229385			0.259355			0.0503534
	0.21911			0.211246			0.223629			0.0202614
	0.210743			0.196727			0.236115			0.0381275
	0.226228			0.148442			0.187363			0.0205406
	0.169962			0.127708			0.239282			0.0410511
	0.201997			0.223667			0.200077			0
	0.153648			0.209768			0.151487			0.0260011
	0.140559			0.185288			0.190062			0.0458537
	0.116073			0.186537			0.167597			0.0250144
	0.276866			0.26846			0.152639			0.00769245
	0.231321			0.250458			0.146992			0.0341368
	0.18738			0.144204			0.184841			0.0261503
	0.176401			0.184494			0.161715			0.0697641
	0.213938			0.17959			0.243086			0.0396993
	0.193155			0.186569			0.140883			0.0668165
	0.0965902			0.189186			0.174233			0.0455647
	0.147644			0.166544			0.153559			0.0146711
	0.168575			0.208329			0.160056			0.0390529
	0.188167			0.200456			0.207457			0.0294092
	0.179651			0.153559			0.227136			0.0474514
	0.18875			0.148088			0.233669			0
	0.198086			0.0933846			0.180365			0.105408
	0.192574			0.173811			0.203918			0.0736936
	0.0867987			0.145294			0.0970717			0.00970015
	0.135904			0.14279			0.1095			0.0242863
	0.126525			0.141778			0.116893			0
	0.16814			0.1191			0.187623			0
	0.146756			0.129366			0.271416			0.0205131
	0.154852			0.199023			0.21981			0.101022
	0.223968			0.21456			0.188773			0.182459
	0.221327			0.163923			0.167951			0.0459339
	0.122011			0.187959			0.0904486			0.0126767
	0.0866836			0.123672			0.122607			0.00405499
	0.110062			0.0970181			0.106028			0
	0.148269			0.14255			0.114603			0
	0.188256			0.107912			0.263815			0.153541
	0.20974			0.256804			0.229025			0.123716
	0.169675			0.161423			0.187779			0.0727766
	0.251396			0.214879			0.139974			0.0373012
	0.113911			0.139979			0.117033			0
	0.0654164			0.192857			0.0694561			0.0166955
	0.108879			0.18209			0.202577			0
	0.105785			0.15998			0.122211			0.0207413
	0.189785			0.203912			0.156859			0.0202596
	0.232799			0.208207			0.144028			0
	0.165815			0.108584			0.10158			0.00916559
	0.148796			0.120622			0.197612			0.0220947
	0.0508149			0.135755			0.164583			0.017134
	0.0665581			0.194432			0.206727			0.0479628
	0.104986			0.178909			0.167671			0.0554867
	0.119935			0.141669			0.141012			0.000972257
	0.167878			0.13813			0.189671			0.0595157
	0.14285			0.164541			0.156273			0.126318
	0.149496			0.177392			0.174363			0.19463
	0.116599			0.139138			0.132796			0.0659329
	0.190011			0.122968			0.29509			0.108449
	0.108768			0.179943			0.205452			0.162086
	0.136381			0.0925761			0.177146			0.194351
	0.0553041			0.120464			0.204974			0
	0.149736			0.170813			0.242633			0.13661
	0.104067			0.177859			0.188959			0.160104
	0.0787659			0.168318			0.166085			0.031811
	0.0431661			0.120169			0.226129			0.102515
	0.0891932			0.142912			0.219483			0.190983
	0.0718837			0.200276			0.274074			0.0318225
	0.112348			0.199272			0.231367			0.166044
	0.16098			0.336326			0.245738			0.321213
	0.143884			0.253497			0.282283			0.268722
	0.102852			0.280931			0.228214			0.219772
	0.158506			0.219301			0.224533			0.238627
	0.130289			0.141251			0.214105			0.199275
	0.0703639			0.044086			0.114914			0.217128
	0.081593			0.0446468			0.186116			0.216703
	0.0470845			0.0374356			0.225388			0.346138
	0.199885			0.0898301			0.280531			0.304218
	0.0865966			0.174162			0.19021			0.197521
	0.0899085			0.155392			0.246772			0.253058
	0.107622			0.190249			0.293802			0.316069
	0.117957			0.140781			0.0888962			0.143981
	0.127192			0.00431649			0.141989			0.230455
	0.138121			0.0500667			0.147205			0.234569
	0.162163			0.0870948			0.144873			0.265939
	0.091347			0.177431			0.186838			0.338278
	0.104377			0.169164			0.151529			0.201289
	0.112521			0.144691			0.186185			0.247949
	0.120484			0.190664			0.21669			0.192284
	0.168165			0.141447			0.232911			0.213552
	0.104707			0.0998294			0.0579359			0.275087
	0.141936			0.190156			0.0895117			0.110037
	0.183971			0.159777			0.106586			0.166886
	0.130531			0.239601			0.169188			0.184079
	0.213432			0.146224			0.25448			0.310753
	0.103389			0.151286			0.0960005			0.185825
	0.156515			0.164173			0.0302605			0.158117
	0.176232			0.150902			0.0717359			0.131897
	0.179378			0.15396			0.138314			0.256172
	0.167581			0.20958			0.221372			0.23427
	0.146691			0.199181			0.13706			0.128953
	0.163678			0.222227			0.142302			0.292573
	0.188922			0.199659			0.0839615			0.204679
	0.171774			0.250685			0.0734731			0.201722
	0.18344			0.193566			0.109961			0.121142
	0.180591			0.132825			0.113069			0.275094
	0.172956			0.179203			0.147825			0.228892
	0.169426			0.168365			0.307067			0.302791
	0.226174			0.301079			0.18347			0.162272
	0.206191			0.16079			0.10278			0.0763683
	0.173736			0.198882			0.220836			0.119048
	0.201785			0.182629			0.263537			0.167016
	0.166274			0.152576			0.277041			0.206792
	0.157477			0.190881			0.189929			0.183655
	0.148405			0.171966			0.198912			0.147599
	0.165863			0.119896			0.0891753			0.136467
	0.142439			0.0896591			0.105804			0.185837
	0.199649			0.183894			0.0278899			0.162278
	0.243734			0.214293			0.174699			0.243538
	0.192407			0.181104			0.176294			0.108759
	0.158937			0.153522			0.221706			0.198455
	0.212611			0.205244			0.0931042			0.165395
	0.125888			0.125859			0.0486836			0.194627
	0.157482			0.1731			0.183316			0.14967
	0.185671			0.135809			0.092051			0.297448
	0.187252			0.25741			0.351136			0.111009
	0.157775			0.116046			0.199119			0.117184
	0.165303			0.152881			0.113581			0.156918
	0.165483			0.183739			0.111576			0.0986005
	0.142451			0.128431			0.151244			0.180467
	0.194015			0.123949			0.0822425			0.233
	0.186489			0.0720106			0.0805816			0.139651
	0.165636			0.206375			0.122524			0.166611
	0.11688			0.131562			0.0920505			0.184574
	0.17692			0.0800815			0.0689682			0.0598211
	0.168555			0.0769311			0.0823588			0.109471
	0.273986			0.122588			0.0619167			0.165926
	0.184723			0.169893			0.164993			0.256825
	0.239652			0.137531			0.210557			0.137019
	0.128838			0.0396407			0.0977012			0.0619581
	0.193999			0.112914			0.165458			0.130955
	0.188966			0.095444			0.0431606			0.0853332
	0.196115			0.0952887			0.0844904			0.155233
	0.21349			0.20083			0.125078			0.117329
	0.139963			0.0917374			0.11853			0.167593
	0.0801932			0.11285			0.161359			0.211905
	0.141333			0.0992149			0.155727			0.111523

## Sheet: Blockers
Sustained-transient index (STi)
100 μm			200 μm			400 μm			800 μm
Proximal ROIs	Distal ROIs		Proximal ROIs	Distal ROIs		Proximal ROIs	Distal ROIs		Proximal ROIs	Distal ROIs
0.0644395	0.0611071		0.162108	0.098103		0.166065	0.136902		0.186717	0.196358
0.105089	0.0307441		0.149069	0.0712538		0.310677	0.172083		0.263643	0.185973
0.0928259	0.0321572		0.192544	0.0882975		0.14388	0.142842		0.235912	0.205401
0.104005	0.0406064		0.218028	0.128762		0.191819	0.135282		0.276968	0.233345
0.046276	0.00711125		0.138155	0.0492807		0.246232	0.0614699		0.283517	0.148761
0	0.0382479		0.11615	0.0873214		0.176283	0.115943		0.200023	0.138001
0.10218	0.0436667		0.222548	0.100361		0.167537	0.10387		0.214685	0.1802
0.024102	0.0366826		0.122921	0.122133		0.144134	0.106333		0.19219	0.185014
0.0993982	0.0518181		0.0960536	0.0576083		0.102487	0.10289		0.15528	0.0553232
0.155954	0.0209028		0.150606	0.0820118		0.221875	0.143387		0.146183	0.0587594
0.1958	0.050846		0.127432	0.0777949		0.144286	0.121343		0.194387	0.100093
0.170876	0.0556588		0.198707	0.0744953		0.106718	0.11803		0.190964	0.120309
0.038694	0.0126364		0.0271619	0.082206		0.130894	0.107508		0.153527	0.126927
0.116069	0.058423		0.0829977	0.074843		0.173327	0.122078		0.279691	0.094174
0.0271248	0.0537796		0.0629401	0.0687913		0.187682	0.12646		0.327311	0.107721
0	0.0676469		0.0349383	0.144561		0.159076	0.125792		0.172462	0.164222
0.00599997	0.0062377		0.172799	0.0288054		0.173667	0.0769482		0.306687	0.0658859
0.0150188	0.0215434		0.0879384	0.0864358		0.120877	0.16084		0.130386	0.0579286
0.0403588	0.0426933		0.0351315	0.107698		0.166811	0.154389		0.362861	0.0771483
0.000111699	0.0253451		0.107332	0.0770302		0.120583	0.109867		0.143086	0.0879205
0	0.0124355		0.1374	0.0603848		0.190746	0.0944394		0.120191	0.0840045
0	0.0530861		0.0418222	0.0689806		0.188166	0.110032		0.130606	0.0496944
0	0.0371262		0.0877244	0.0463976		0.0452541	0.0787289		0.175418	0.0934944
0.16059	0.0203013		0.0176605	0.0731217		0.0628217	0.0881217		0.177485	0.100808
0.0203097	0.016933		0.0948398	0.0456094		0.06157	0.0983825		0.156172	0.0459396
0.00146021	0.0510964		0.0679249	0.0535278		0.104251	0.108713		0.117009	0.0507312
0.0835523	0.0304402		0.0433681	0.0586535		0.124354	0.113873		0.164667	0.0435325
0.0374758	0.0244333		0.0539577	0.0569925		0.139358	0.0895679		0.0411395	0.0408335
0.0879992	0.0306918		0.0757118	0.0582392		0.0800932	0.109068		0.235127	0.0647634
0.0102896	0.0429132		0.0895742	0.0682426		0.083226	0.103381		0.0759582	0.0463765
0.159598	0.06805		0.128829	0.0639753		0.348077	0.100902		0.306299	0.0897593
0	0.0328566		0.129371	0.0458482		0.171221	0.106345		0.250692	0.0712829
0.0262308	0.0558657		0.254872	0.0253943		0.300179	0.0988209		0.353994	0.040888
0	0.0664775		0.184702	0.0836218		0.228124	0.140342		0.296967	0.0453829
0.0616494	0.0407986		0.111964	0.0354313		0.279805	0.0974385		0.340427	0.0408092
0.12137	0.0248098		0.17294	0.065856		0.404528	0.131961		0.374561	0.0493984
0.234984	0.0411936		0.314481	0.0641148		0.224013	0.0975743		0.350678	0.0867786
0.24433	0.0607743		0.182513	0.0757785		0.190979	0.0654613		0.201353	0.0631749
0.178212	0.0913551		0.294596	0.123469		0.264504	0.12349		0.194915	0.0940331
0.183174	0.043583		0.322621	0.0324088		0.22679	0.0988379		0.481364	0.0822383
0.139664	0.0783978		0.202089	0.0429602		0.248093	0.0922511		0.352751	0.0326939
0.0316627	0.0406649		0.211871	0.0496437		0.222876	0.122347		0.290008	0.0436166
0.194037	0.041596		0.219254	0.0485335		0.220549	0.103823		0.186822	0.0369138
0.209178	0.0487124		0.237317	0.0807473		0.365525	0.131609		0.256462	0.0516079
0.163341	0.0486727		0.251555	0.0867827		0.247627	0.10923		0.228961	0.0771763
0.139686	0.0722856		0.220046	0.0764787		0.32788	0.117378		0.282209	0.0782683
0.231085	0.083021		0.171867	0.0981367		0.252941	0.0873297		0.244018	0.0902613
0.119	0.0963455		0.221257	0.0620178		0.230114	0.11019		0.259666	0.192432
0.130969	0.0504758		0.153899	0.0558045		0.214824	0.0948933		0.269428	0.0842991
0.192967	0.0506636		0.311544	0.0357914		0.226412	0.0892515		0.196723	0.0522846
0.160731	0.0394082		0.244475	0.0759835		0.240883	0.099938		0.165597	0.0421286
0.208803	0.0486829		0.143014	0.0922068		0.261961	0.114302		0.238832	0.045933
0.0785612	0.0847777		0.180152	0.1092		0.232696	0.123183		0.213147	0.0574069
0.150898	0.08011		0.259387	0.0992686		0.239725	0.144006		0.212481	0.10619
0.193329	0.0662749		0.238898	0.0785416		0.293079	0.121077		0.208786	0.0810326
0.174085	0.0319321		0.28358	0.0560598		0.255586	0.0759518		0.256823	0.0993911
0.164846	0.0293749		0.261285	0.09592		0.239099	0.128766		0.309896	0.0488732
0.172451	0.0509566		0.292046	0.118383		0.252514	0.141563		0.173867	0.0665406
0.168717	0.0505318		0.233893	0.137357		0.247025	0.111537		0.188827	0.0505426
0.143928	0.0974395		0.126437	0.151732		0.231904	0.167095		0.242284	0.0800168
0.179664	0.120134		0.278508	0.121358		0.359822	0.134236		0.350559	0.0686828
0.23083	0.106327		0.282047	0.111555		0.25398	0.0963651		0.306711	0.0580902
0.14019	0.0597842		0.242586	0.0930152		0.204258	0.129484		0.285319	0.0514547
0.192914	0.0899437		0.21347	0.0739115		0.250556	0.122688		0.232531	0.0823704
0.242033	0.0365424		0.243697	0.0777843		0.2592	0.135019		0.314624	0.0509587
0.156715	0.0384281		0.215472	0.0804339		0.194285	0.111173		0.227664	0.0664909
0.179333	0.0897619		0.220636	0.151135		0.238521	0.164472		0.268913	0.0531561
0.0858791	0.141137		0.127219	0.139168		0.257674	0.152645		0.29323	0.0700412
0.149212	0.0934852		0.237986	0.133577		0.224405	0.12758		0.311031	0.0618342
0.148121	0.123716		0.199797	0.147346		0.181197	0.148877		0.174573	0.060078
0.128366	0.0781281		0.226477	0.133435		0.232153	0.14496		0.199936	0.0517952
	0.0809662			0.0787939			0.126115			0.0538131
	0.0683612			0.0702288			0.117651			0.0502897
	0.0241988			0.134367			0.136318			0.0719923
	0.0484053			0.102567			0.148218			0.0807254
	0.05658			0.112622			0.106834			0.044159
	0.0572332			0.0790476			0.139176			0.0464891
	0.0605626			0.0789911			0.160734			0.0539761
	0.053724			0.0776327			0.142247			0.108512
	0.0223658			0.0761747			0.110697			0.0455219
	0			0.0760144			0.127431			0.043925
	0.0422008			0.0954344			0.144516			0.0501345
	0.0666474			0.080625			0.109834			0.0580881
	0.0405305			0.06337			0.100589			0.0469578
	0.0290011			0.05866			0.119677			0.072322
	0.0463542			0.110351			0.14518			0.0690533
	0.05162			0.080542			0.13426			0.0502261
	0.0372712			0.0746255			0.0997399			0.103668
	0			0.102646			0.15696			0.0782516
	0.0508511			0.0997954			0.155351			0.0734005
	0.0799475			0.0737573			0.133039			0.131325
	0.0572169			0.0848195			0.100887			0.198656
	0.0985132			0.200892			0.0454306			0.139297
	0			0.0630033			0.0906245			0.065408
	0			0.0601844			0.0674985			0.0294867
	0			0.0101982			0.0594234			0.0749464
	0			0.0217151			0.068843			0.0939582
	0			0.0248082			0.113532			0.1116
	0			0.0194082			0.0396491			0.0955693
	0.0259358			0.0495108			0.046608			0.0574974
	0.00667864			0.0789401			0.0377248			0.132783
	0			0.0843043			0.0430856			0.0229609
	0			0.0451737			0.0497762			0.0188282
	0			0.0526562			0.0362571			0.0618128
	0			0.0176358			0.0432726			0.0887674
	0			0.0478613			0.0621125			0.109543
	0.0825989			0.0449205			0.0380187			0.116097
	0.0503871			0.0735306			0.0510797			0.110124
	0			0.0716198			0.0411756			0.0177658
	0			0.082559			0.0313692			0.0269389
	0			0.0610474			0.0681461			0.0932455
	0			0.0488062			0.0562849			0.100085
	0.119438			0.0384544			0.060684			0.113667
	0			0.027543			0.0433367			0.0799186
	0			0.0534117			0.0498793			0.0471795
	0.0304967			0.0877243			0.0447521			0.0309595
	0.0562747			0.0557822			0.0747735			0.0912481
	0			0.0854879			0.0615607			0.122761
	0			0.0695934			0.12596			0.157554
	0			0.0943327			0.0490282			0.0577835
	0			0.0178797			0.0382774			0.0891733
	0			0.0402008			0.0345101			0.00997638
	0			0.0375818			0.0262732			0.026071
	0			0.0620892			0.0500389			0.0580391
	0.0179649			0.022808			0.0535996			0.0641671
	0			0.0635697			0.0667441			0.106959
	0			0.0463417			0.0672397			0.0767874
	0			0.0717503			0.0456524			0.0709806
	0			0.0283329			0.0309006			0.0262941
	0.00373541			0.0439879			0.0585104			0.0408412
	0			0.0771443			0.0731647			0.123996
	0			0.0493198			0.0329514			0.0920223
	0.0152437			0.0733205			0.067357			0.143866
	0.00747854			0.015643			0.0226066			0.0648873
	0.114785			0.170331			0.25909			0.225927
	0.0192839			0.0548031			0.041003			0.057089
	0.00308993			0.0785311			0.0672598			0.0661379
	0.00316646			0.0780903			0.0224056			0.0809209
	0			0.0523874			0.0451437			0.119438
	0.0503069			0.0568857			0.0322663			0.148843
	0.0135281			0.0199387			0.0249754			0.109343
	0.027553			0.081042			0.107672			0.131963
	0.0107891			0.0585392			0.056875			0.121675
	0.0095821			0.037537			0.0538781			0.0382341
	0.0326304			0.0533211			0.0373171			0.0600016
	0.00594103			0.0450942			0.0704823			0.110136
	0.0129782			0.0579451			0.033412			0.0975767
	0.0351651			0.043687			0.0889298			0.0467083
	0.0161078			0.0454372			0.0402559			0.0262787
	0.00827521			0.0840291			0.0712424			0.100633
	0.0274279			0.0692645			0.0492853			0.10142
	0.0285003			0.0208022			0.0677146			0.0466146
	0.021445			0.0474445			0.0677506			0.122783
	0			0.0629767			0.0409304			0.107878
	0.0174			0.0330251			0.0427808			0.124657
	0.0144457			0.0548228			0.060008			0.077992
	0			0.0288192			0.0846223			0.0533246
	0.0340817			0.0228051			0.0357884			0.101818
	0.0235533			0.0468473			0.0705055			0.0452727
	0.0120419			0.0455575			0.0814235			0.0464767
	0.00270071			0.0123283			0.0629124			0.0880162
	0			0.0362856			0.0383384			0.106753
	0.0357881			0.0236109			0.0823792			0.120622
	0.0404436			0.120215			0.152179			0.103757
	0.0152932			0.0820388			0.0894066			0.122886
	0.0752408			0.0430177			0.0436866			0.120535
	0.0242074			0.0494353			0.103736			0.0769157
	0.050211			0.131889			0.154828			0.113452
	0.0485251			0.166813			0.212374			0.173153
	0.0433572			0.13901			0.169295			0.163982
	0.0241612			0.0993034			0.148301			0.170153
	0.00745392			0.075454			0.103133			0.123431
	0.0459393			0.0704088			0.114389			0.156517
	0.0598028			0.0703215			0.0876983			0.171603
	0.0587608			0.174868			0.212807			0.188286
	0.0223426			0.124067			0.153061			0.161659
	0.0219431			0.0717811			0.146853			0.181992
	0.0104721			0.133596			0.1819			0.148697
	0.0281504			0.117023			0.189588			0.26288
	0.0507367			0.144438			0.191819			0.258667
	0.0514459			0.115806			0.162993			0.148779
	0.0955198			0.159415			0.175912			0.175665
	0.104884			0.137189			0.178859			0.145373
	0.047985			0.241687			0.172559			0.274567
	0.13003			0.107934			0.134856			0.202864
	0.0736216			0.146069			0.214239			0.247018
	0.132788			0.150948			0.157112			0.188409
	0.0451361			0.176188			0.128399			0.183125
	0.0732367			0.155613			0.142343			0.0958135
	0.0731633			0.201769			0.178494			0.124435
	0.12968			0.245207			0.169147			0.149367
	0.107547			0.237603			0.179676			0.166047
	0.143367			0.218517			0.146806			0.260478
	0.124761			0.156438			0.110045			0.148138
	0.199746			0.274508			0.195764			0.224286
	0.11277			0.22539			0.12501			0.113558
	0.136415			0.176808			0.0877953			0.183543
	0.0347405			0.168367			0.158272			0.178489
	0.138969			0.177526			0.200104			0.198591
	0.105598			0.258277			0.168836			0.207491
	0.101061			0.218539			0.143679			0.160182
	0.105539			0.217332			0.141225			0.137892
	0.130275			0.197406			0.15798			0.0999946
	0.122798			0.245482			0.205377			0.234113
	0.0505753			0.204341			0.12349			0.148203
	0.126593			0.220989			0.191595			0.189719
	0.116511			0.185784			0.135153			0.12206
	0.106591			0.256758			0.134524			0.176812
	0.152222			0.295277			0.205801			0.180757
	0.145975			0.278037			0.254479			0.183201
	0.0964695			0.198036			0.165129			0.208403
	0.133681			0.250257			0.222157			0.179934
	0.147641			0.253437			0.171501			0.133944
	0.0984077			0.284552			0.113187			0.145396
	0.164825			0.232916			0.193225			0.127735
	0.0923575			0.240041			0.158651			0.117998
	0.123673			0.244436			0.19674			0.151021
	0.188653			0.223784			0.18153			0.180292
	0.127604			0.242642			0.147524			0.162862
	0.117552			0.310964			0.193583			0.199529
	0.13823			0.28976			0.146145			0.165946
	0.130228			0.225704			0.127597			0.138433
	0.103708			0.165564			0.161288			0.166343
	0.0926034			0.252078			0.21223			0.159775
	0.185728			0.238499			0.220198			0.187603
	0.171246			0.256003			0.170576			0.174984
	0.185358			0.271502			0.219524			0.19617
	0.0965216			0.196251			0.142566			0.159229
	0.114539			0.25815			0.158614			0.18585
	0.0131738			0.194515			0.180467			0.202149
	0.0990045			0.273698			0.163124			0.223455
	0.203813			0.304741			0.18854			0.287661
	0.166695			0.264258			0.227573			0.217324
	0.173247			0.271532			0.17097			0.213965
	0.108655			0.267748			0.168822			0.161051
	0.110852			0.239114			0.166657			0.142869
	0.100704			0.190971			0.147021			0.177014
	0			0.135499			0.131813			0.180643
	0			0.232202			0.178973			0.171567
	0.103198			0.207587			0.215114			0.175138
	0.0260432			0.218173			0.218237			0.206061
	0.112904			0.233228			0.245602			0.330476
	0.0910187			0.235235			0.193472			0.20892
	0.0995487			0.287688			0.193075			0.188142
	0.07452			0.201425			0.132041			0.224977
	0.0718801			0.236177			0.167486			0.242336
	0.0329134			0.110069			0.173809			0.218098
	0			0.232397			0.163672			0.245007
	0			0.143686			0.130473			0.0900322
	0.0364953			0.241778			0.146431			0.134657
	0.00324177			0.21031			0.148678			0.209648
	0.0306033			0.15206			0.132697			0.172828
	0			0.199068			0.175664			0.171595
	0.0851559			0.196928			0.263418			0.274199
	0.0982611			0.179701			0.172036			0.262515
	0.103835			0.0847041			0.177363			0.260394
	0.0769677			0.130915			0.165485			0.293664
	0.124178			0.169952			0.183348			0.303318
	0.128834			0.199			0.21971			0.262005
	0.0982467			0.156645			0.236774			0.223879
	0.110532			0.201031			0.214819			0.2104
	0.0753699			0.216343			0.15084			0.198624
	0.167946			0.221141			0.178368			0.245847
	0.17556			0.246051			0.242926			0.338817
	0.121421			0.0987686			0.107248			0.161506
	0.0268097			0.0726044			0.1613			0.169668
	0.137722			0.170108			0.215219			0.229632
	0.129262			0.195925			0.203179			0.223878
	0.140894			0.222903			0.220344			0.200753
	0.178029			0.230503			0.203327			0.24495
	0.208784			0.295572			0.379846			0.307585
	0.205715			0.32394			0.317264			0.351603
	0.0419023			0.104835			0.136511			0.203593
	0.0361983			0.151438			0.182137			0.154269
	0.0900096			0.150209			0.190602			0.193356
	0.146059			0.161898			0.234606			0.25774
	0.0535875			0.155428			0.216232			0.217667
	0.128975			0.20438			0.164353			0.25177
	0.00769116			0.119222			0.187985			0.17004
	0.0464634			0.190615			0.181092			0.129294
	0.159109			0.188923			0.218516			0.230987
	0.0834717			0.1607			0.134832			0.221525
	0.0794797			0.194239			0.18555			0.194162
	0.09891			0.138399			0.123994			0.173849
	0.14062			0.147542			0.150532			0.198149
	0.195361			0.218048			0.166287			0.228872
	0.0599239			0.180669			0.17993			0.183747
	0.112073			0.190673			0.183675			0.17062
	0.137655			0.226735			0.182402			0.190849
	0.14388			0.165379			0.167202			0.179739
	0.120836			0.165368			0.168403			0.17567
	0.0869732			0.106229			0.153243			0.130749
	0.106373			0.139121			0.135491			0.165703
	0.119892			0.13981			0.15591			0.18306
	0.0925256			0.170224			0.225437			0.194065
	0.13097			0.140463			0.141793			0.154852
	0.196068			0.225405			0.184585			0.252792
	0.165998			0.236552			0.189463			0.213758
	0.15034			0.156484			0.163999			0.151543
	0.145935			0.130556			0.179834			0.188196
	0.131315			0.19673			0.154712			0.122998
	0.127274			0.193634			0.145255			0.203633
	0.06405			0.195487			0.17216			0.217404
	0.0718697			0.11537			0.13363			0.152599
	0.19832			0.167562			0.156519			0.181923
	0.168271			0.175982			0.163062			0.19799
	0.135867			0.176784			0.155764			0.176821
	0.178515			0.143848			0.12356			0.140698
	0.132621			0.141139			0.179019			0.174558
	0.140323			0.201876			0.195624			0.200606
	0.112666			0.103112			0.107808			0.193272
	0.121187			0.118654			0.0912532			0.166287
	0.156293			0.119012			0.140696			0.165265
	0.175933			0.116191			0.0981906			0.131084
	0.144213			0.167181			0.135382			0.155576
	0.0926609			0.157724			0.129248			0.190147
	0.13386			0.187466			0.193174			0.162402
	0.0917321			0.170758			0.225211			0.221464
	0.0395856			0.144999			0.127852			0.174732
	0.0967399			0.135588			0.104684			0.167957
	0.127674			0.116209			0.0954514			0.16398
	0.140584			0.145564			0.163277			0.227159
	0.103817			0.17174			0.169235			0.173362
	0.05759			0.149527			0.173969			0.179137
	0.0794134			0.125745			0.194682			0.158254
	0.0769408			0.186932			0.217288			0.268621
	0.11239			0.0772131			0.128564			0.156844
	0.0672305			0.162926			0.110305			0.164979
	0.103893			0.151608			0.117581			0.186209
	0.0938039			0.125589			0.113788			0.206459
	0.108714			0.139969			0.144553			0.192341
	0.12183			0.152865			0.149587			0.21205
	0.052255			0.0955118			0.157606			0.141595
	0.0534283			0.164316			0.123321			0.177539
	0.124411			0.124849			0.165978			0.265862
	0.101077			0.125273			0.182832			0.228805
	0.0640147			0.0906785			0.148555			0.192444
	0.0645201			0.112845			0.11324			0.177676
	0.100576			0.10247			0.10881			0.184417
	0.060292			0.136647			0.133251			0.210147
	0.123755			0.106162			0.162751			0.173172
	0.100275			0.12303			0.152972			0.168737
	0.0303309			0.111635			0.220796			0.207745
	0.0992639			0.150241			0.198213			0.191755
	0.0626435			0.1493			0.186278			0.204543
	0.0969325			0.0820717			0.120206			0.170127
	0.0730598			0.124639			0.162416			0.168644
	0.072638			0.151786			0.167103			0.189467
	0.0811458			0.10581			0.143616			0.198387
	0.0402992			0.0709415			0.116655			0.179586
	0.00357044			0.113127			0.187797			0.203457
	0.0514947			0.0976073			0.18578			0.211613
	0.0568922			0.11236			0.163943			0.232889
	0.0381142			0.169806			0.232496			0.278806
	0.103748			0.180869			0.224796			0.27506
	0.0710544			0.173025			0.228468			0.35082
	0.1077			0.119807			0.0572755			0.153972
	0.0889501			0.115086			0.135926			0.177267
	0.0378537			0.110493			0.112926			0.203993
	0.0876507			0.0548547			0.121637			0.191548
	0.210551			0.128568			0.037105			0.266131
	0.128187			0.134266			0.175363			0.286289
	0.104294			0.0972102			0.108577			0.152452
	0.0775662			0.105516			0.115537			0.201269
	0.108905			0.122906			0.128348			0.20344
	0.068691			0.085736			0.0698645			0.131481
	0.068451			0.0730543			0.103005			0.159871
	0.0977048			0.0646252			0.0915139			0.179602
	0.0687858			0.0547478			0.121032			0.133153
	0.10128			0.197684			0.121324			0.259218
	0.0691682			0.202697			0.1489			0.195532
	0.070563			0.131901			0.173894			0.206322
	0.0560592			0.0781217			0.0861779			0.161483
	0.0166344			0.0952203			0.150383			0.1883
	0.0856143			0.0611871			0.0868632			0.177749
	0.0497489			0.0904161			0.196494			0.213589
	0.0656053			0.0985908			0.141795			0.218296
	0.0841096			0.144468			0.143921			0.16632
	0.0672926			0.11498			0.156099			0.139501
	0.0113936			0.0708512			0.0674123			0.107383
	0.0585884			0.0707907			0.0596911			0.112144
	0.0597325			0.0929346			0.0804388			0.110852
	0.0445694			0.130897			0.264247			0.18457
	0.0428411			0.116823			0.121771			0.155526
	0.122466			0.117444			0.14412			0.118179
	0.133854			0.136311			0.13788			0.151282
	0.0541522			0.0844771			0.0842456			0.184745
	0.060658			0.123814			0.151843			0.209905
	0.110928			0.26064			0.0863371			0.161232
	0.0454747			0.119174			0.138632			0.190807
	0.0850861			0.178302			0.130285			0.205289
	0.136744			0.15989			0.110381			0.194098
	0.149514			0.229184			0.0978175			0.25177
	0.112232			0.0643383			0.145612			0.161513
	0.107871			0.252703			0.185219			0.264108
	0.0918409			0.158684			0.0983886			0.145137
	0.080372			0.149629			0.13776			0.214081
	0.0742549			0.118742			0.114968			0.20616
	0.0863358			0.0983762			0.138094			0.171231
	0.143567			0.133537			0.157708			0.149869
	0.116458			0.0860835			0.0936219			0.101216
	0.0940187			0.147407			0.183464			0.280042
	0.139602			0.176139			0.124627			0.22322
	0.0732217			0.128282			0.140156			0.154082
	0.0673874			0.124612			0.0911877			0.129272
	0.164065			0.12166			0.184666			0.162492
	0.128918			0.0851807			0.0676638			0.170072
	0.106639			0.111311			0.114427			0.197055
	0.173429			0.206487			0.145872			0.214067
	0.135944			0.207125			0.191055			0.256307
	0.0451726			0.107436			0.139896			0.191346
	0.0181851			0.116448			0.152403			0.145914
	0.146535			0.176509			0.24365			0.221223
	0.217606			0.112505			0.113732			0.200851
	0.164533			0.176827			0.131641			0.155256
	0.156262			0.14255			0.127411			0.142334
	0.0330627			0.109472			0.111914			0.188394
	0.152156			0.129552			0.144531			0.155145
	0.0161807			0.0810807			0.164824			0.167859
	0.0806312			0.147814			0.112436			0.164547
	0.119507			0.180068			0.119626			0.234069
	0.110806			0.108727			0.141918			0.279879
	0.146236			0.156616			0.220971			0.190157
	0.0927298			0.138525			0.121208			0.20483
	0.0708593			0.15643			0.112958			0.239629
	0			0.0967254			0.102915			0.123109
	0.0779236			0.164216			0.169259			0.213158
	0.0397271			0.124285			0.0981434			0.261352
	0.146555			0.160329			0.233642			0.190535
	0.0400958			0.162746			0.177724			0.280615
	0.061911			0.0871865			0.0579633			0.263367
