# Supplementary material for: Spatiotemporal properties of glutamate input support direction selectivity in the dendrites of retinal starburst amacrine cells
Source: eLife. 2022 Nov 8;11:e81533. doi: 10.7554/eLife.81533 (PMC9674338; doi:10.7554/eLife.81533)
Supplement: Figure 6—source data 1. [file elife-81533-fig6-data1.xlsx]

## Sheet: Model parameters
Model Parameters (see Vlasits et al., 2016; Ding et al., 2016):
	Soma	Initial dendrite	Middle dendrite	Terminal dendrite
Length [µm]	7	10	140	20
Diameter [µm]	7	0.4	0.2	0.2
Ra [Ω-cm]	150	150	150	150
‍gleak (hh) [S/cm2]	4.6e-05	4.6e-05	4.6e-05	4.6e-05
‍ Leak reversal [mV]	-54.4	-54.4	-54.4	-54.4
‍Kv (delayed rectifier) [S/cm2]	0.003	0.00276	0.00192	0.00177
‍Nav1.8 [S/cm2]	0	0	0	0.003
‍L-type Ca2+ [S/cm2]	0	0	0.001	0.001

## Sheet: BC pdf
Bipolar Cell Distributions (population distribution transcribed from Fig. 2 of Ding et al., 2016):
Somatic Distance Bin [µm]	Sustained (BC7)	Transient (BC5s)
0 - 10	0.0339	0
2022-10-20	0.127	0.037
20 - 30	0.271	0.0741
30 - 40	0.144	0.0519
40 - 50	0.119	0.0963
50 - 60	0.0932	0.0815
60 - 70	0.0169	0.0889
70 - 80	0.0508	0.0444
80 - 90	0.0424	0.17
90 - 100	0.0339	0.141
100 - 110	0.0339	0.0741
110 - 120	0.0254	0.0593
120 - 130	0.00847	0.037
130 - 140	0	0.0296
‍140 - 150	0	0.00741
‍150 - 160	0	0.00741
Bipolar Cell Locations (used in Fig. 6B):
Sustained [µm]	10, 20, 25, 30, 40, 50
Transient [µm]	20, 40, 50, 60, 70, 75, 80, 85, 90, 100, 110, 120
